# Supplementary material for: Synthesis of arrays containing porphyrin, chlorin, and perylene-imide constituents for panchromatic light-harvesting and charge separation
Source: Royal Society of Chemistry journal article supplement (doi:10.1039/c8ra04052d), 2018-01-01
Supplement: c8ra04052d1.pdf [file c8ra04052d1.pdf]

Supplementary Information for:

**Synthesis of Arrays Containing Porphyrin, Chlorin, and Perylene-Imide Constituents for  
Panchromatic Light-Harvesting and Charge Separation**

Gongfang Hu, Hyun Suk Kang, Amit K. Mandal, Arpita Roy, Christine Kirmaier,  
David F. Bocian, Dewey Holten, and Jonathan S. Lindsey

**Table of Contents**

| <b>Topic</b>                                                        | <b>Pages</b> |
|---------------------------------------------------------------------|--------------|
| Spectra of new compounds                                            | S2–S50       |
| Analytical SEC traces for arrays and benchmarks                     | S51–S59      |
| Analytical SEC monitoring of the formation of pentad <b>C-T-PDI</b> | S60          |

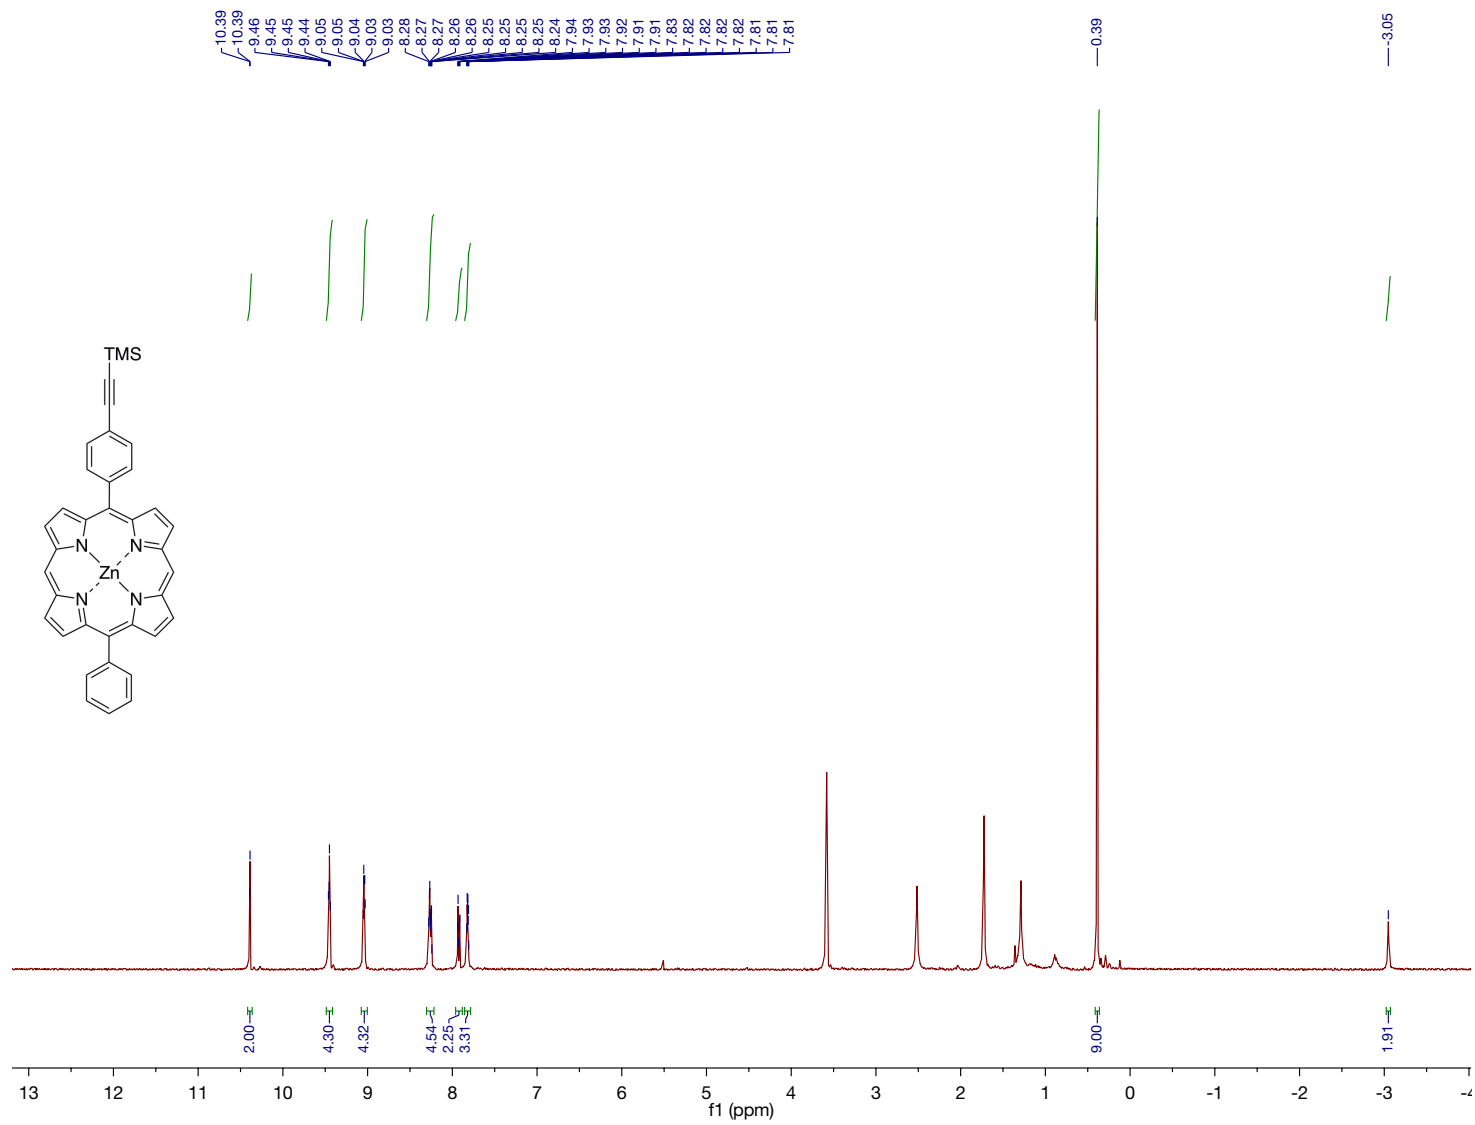

Figure S1. The  $^1\text{H}$  NMR spectrum of Zn2-TMS.

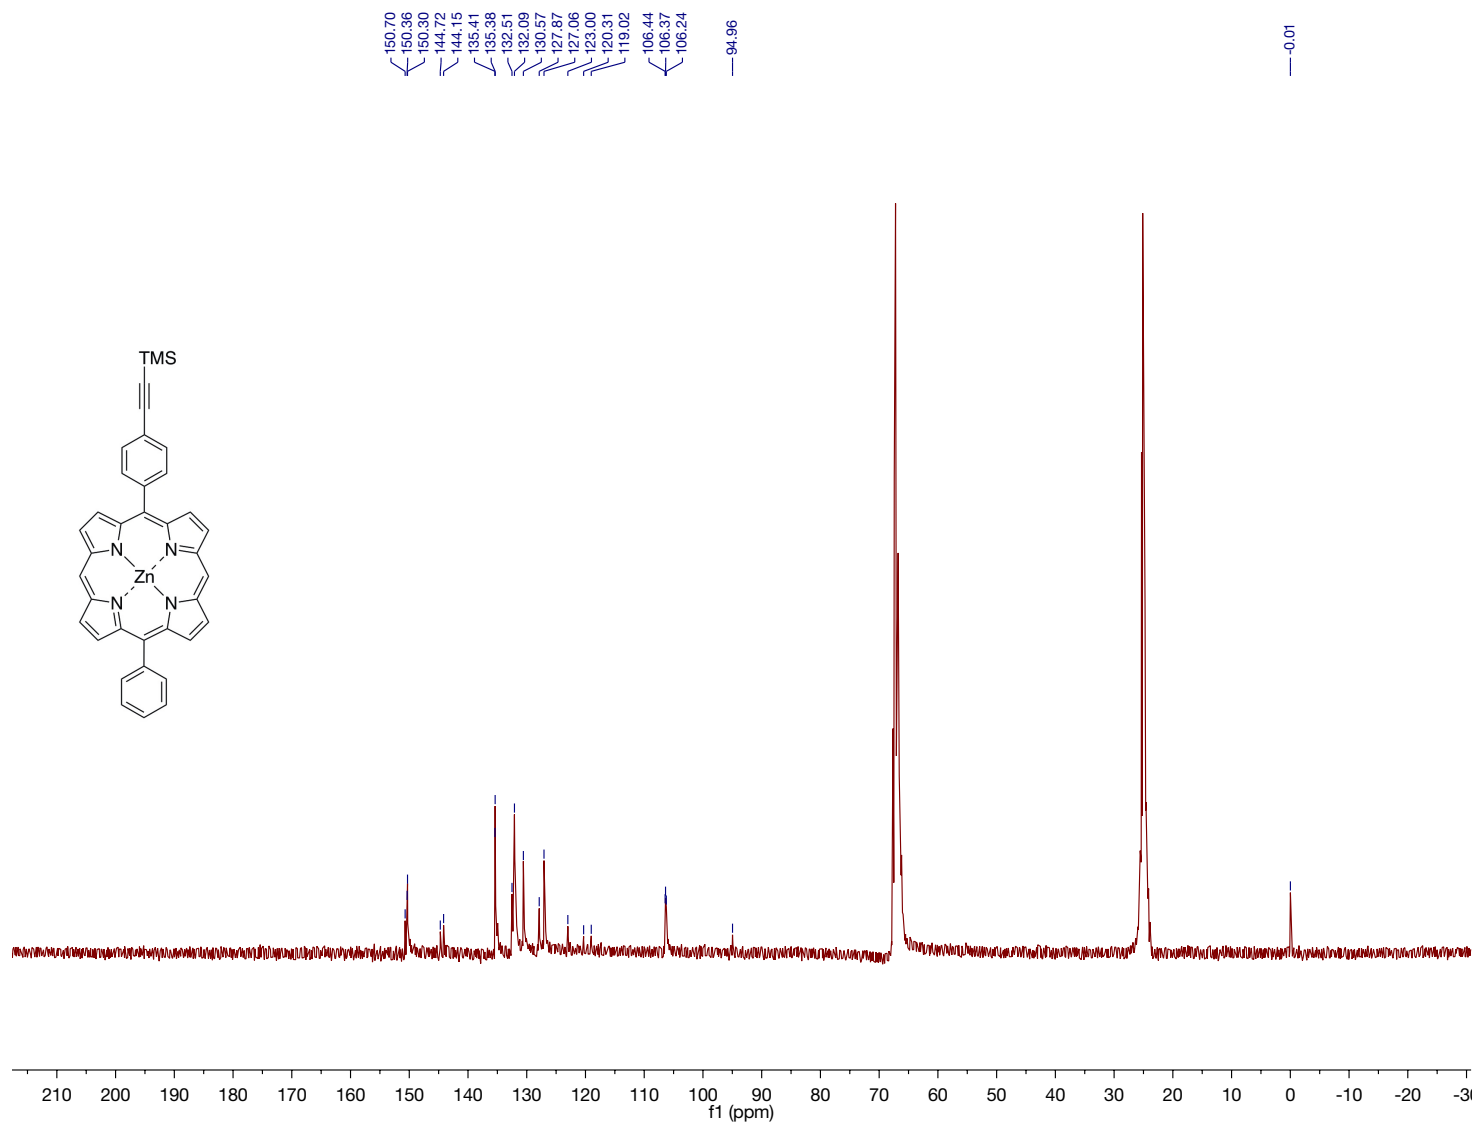

**Figure S2.** The  $^{13}\text{C}$  NMR spectrum of Zn2-TMS.

| Sample     | M <sub>Theoretical</sub>        | M <sub>Experimental</sub>       | ΔM (ppm) | Elemental Composition                               |
|------------|---------------------------------|---------------------------------|----------|-----------------------------------------------------|
| PHGF-II-Zn | 621.14475<br>[M+H] <sup>+</sup> | 621.14281<br>[M+H] <sup>+</sup> | -3.113   | C <sub>37</sub> H <sub>28</sub> N <sub>4</sub> SiZn |

### MS Data

PHGF-II-Zn

140548\_PHGF-II-Zn #264-333 RT: 1.36-1.72 NL: 6.11E7

T: FTMS + p ESI Full ms [150.00-800.00]

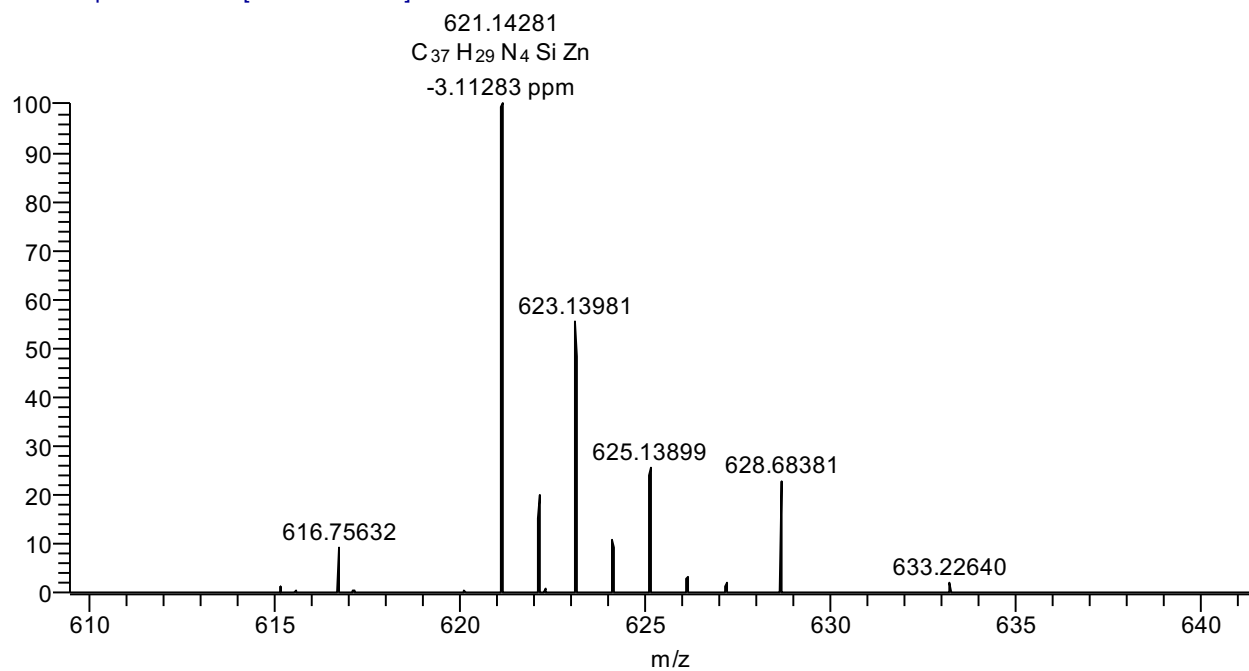

**Figure S3.** The ESI-MS spectrum of **Zn2-TMS**.

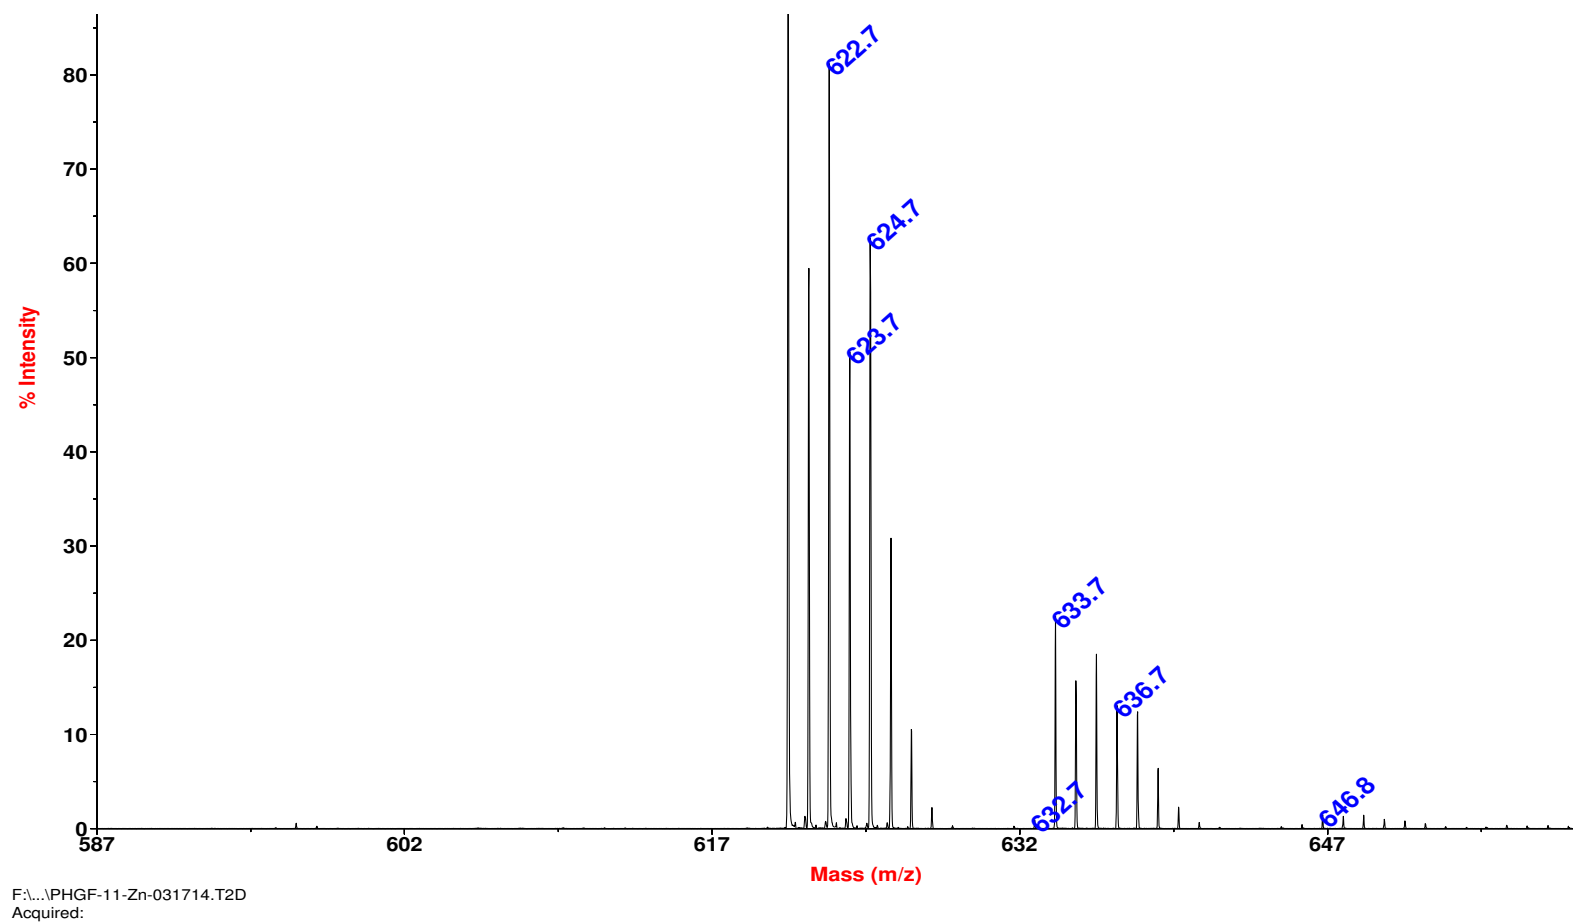

**Figure S4.** The MALDI-MS spectrum of **Zn<sub>2</sub>-TMS**.

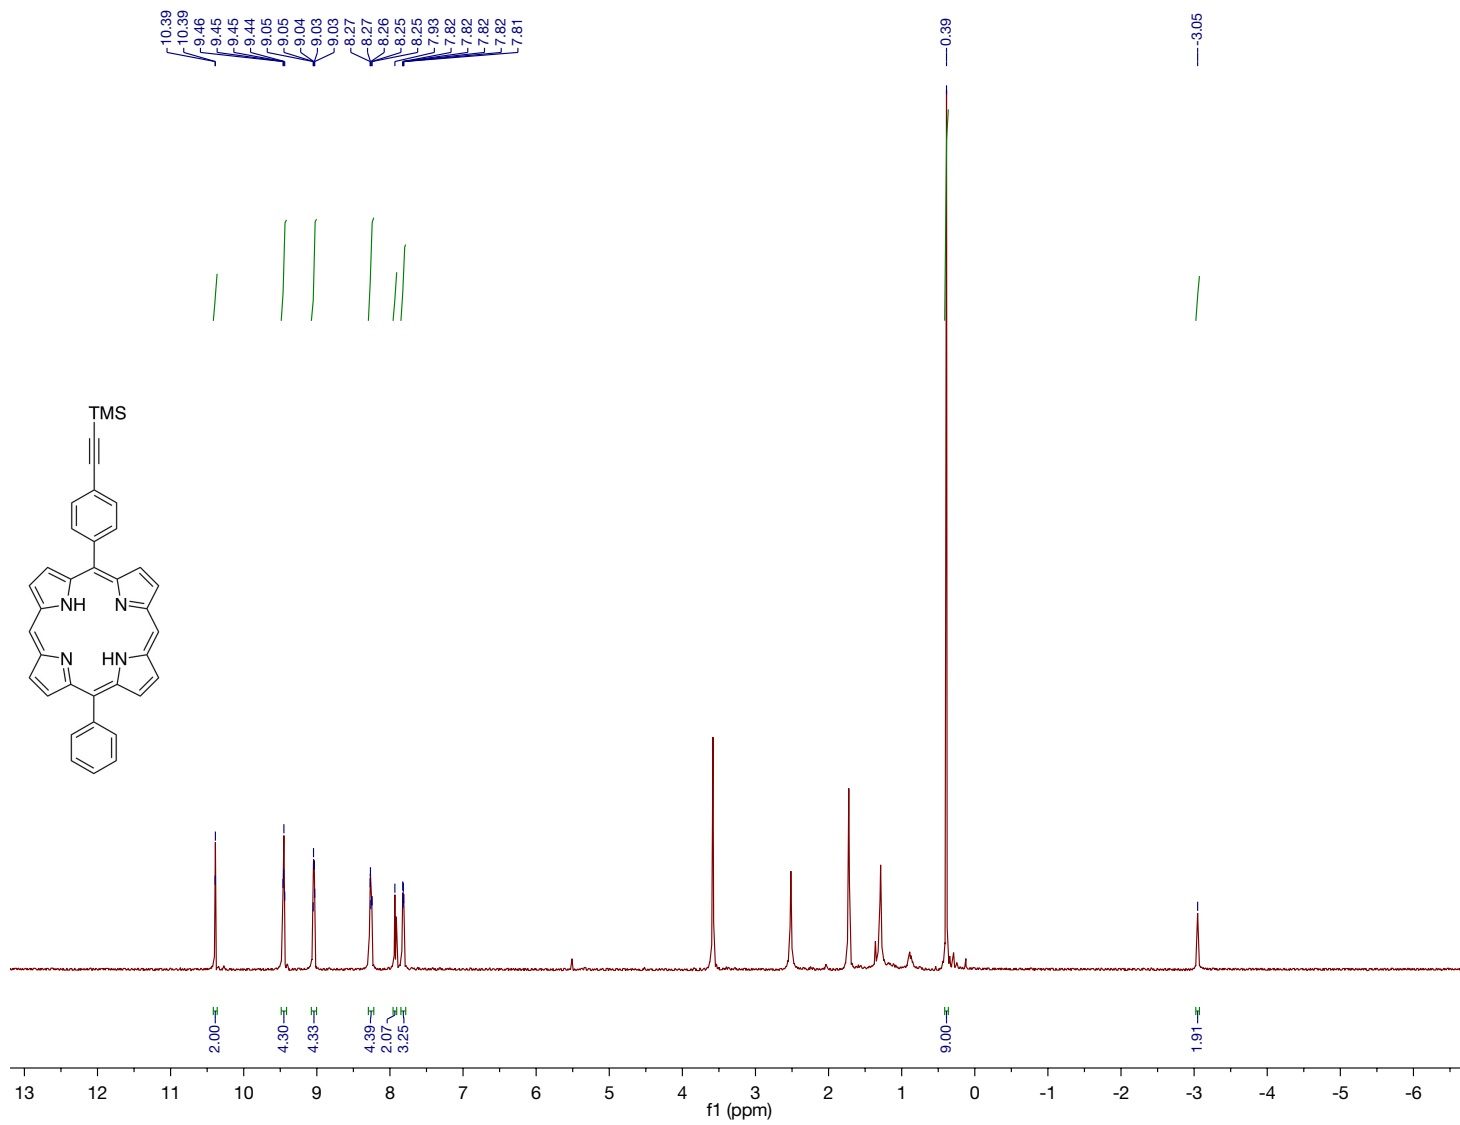

**Figure S5.** The <sup>1</sup>H NMR spectrum of 2-TMS.

| Sample  | M <sub>Theoretical</sub>        | M <sub>Experimental</sub>       | ΔM (ppm) | Elemental Composition                             |
|---------|---------------------------------|---------------------------------|----------|---------------------------------------------------|
| PHGF-II | 559.23125<br>[M+H] <sup>+</sup> | 559.23264<br>[M+H] <sup>+</sup> | 2.488    | C <sub>37</sub> H <sub>30</sub> N <sub>4</sub> Si |

### MS Data

PHGF-II

140554\_PHGF-II #12-115 RT: 0.05-0.51 A\ NL: 6.97E7  
T: FTMS + p ESI Full ms [250.00-800.00]

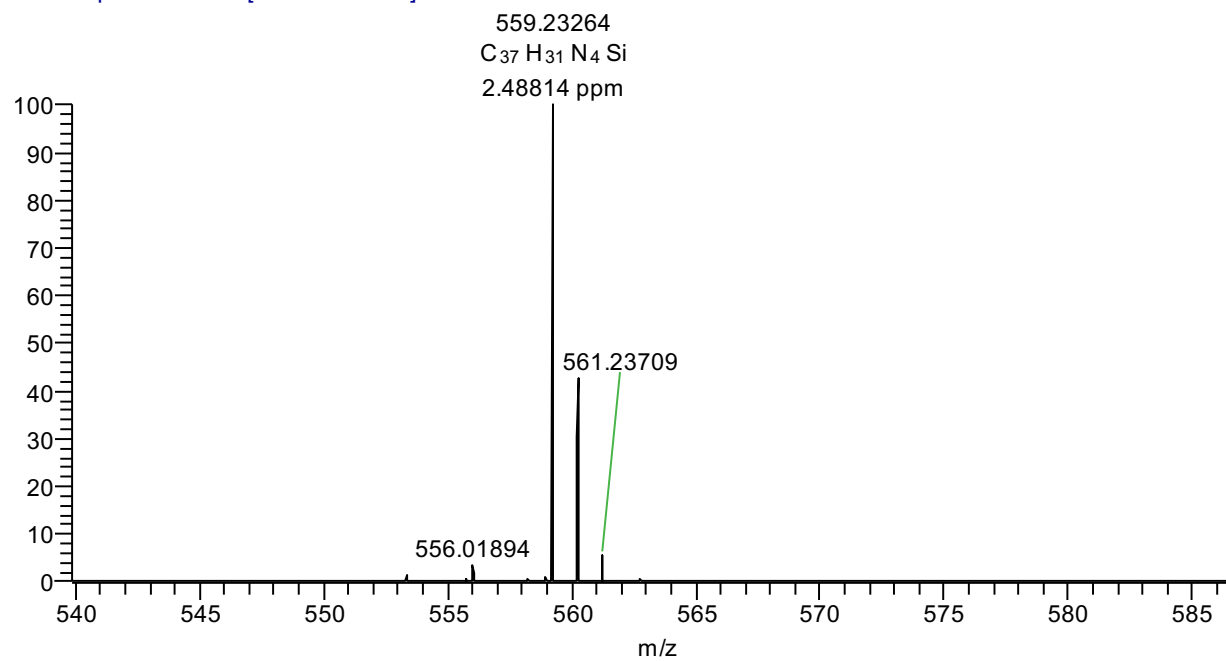

Figure S6. The ESI-MS spectrum of 2-TMS.

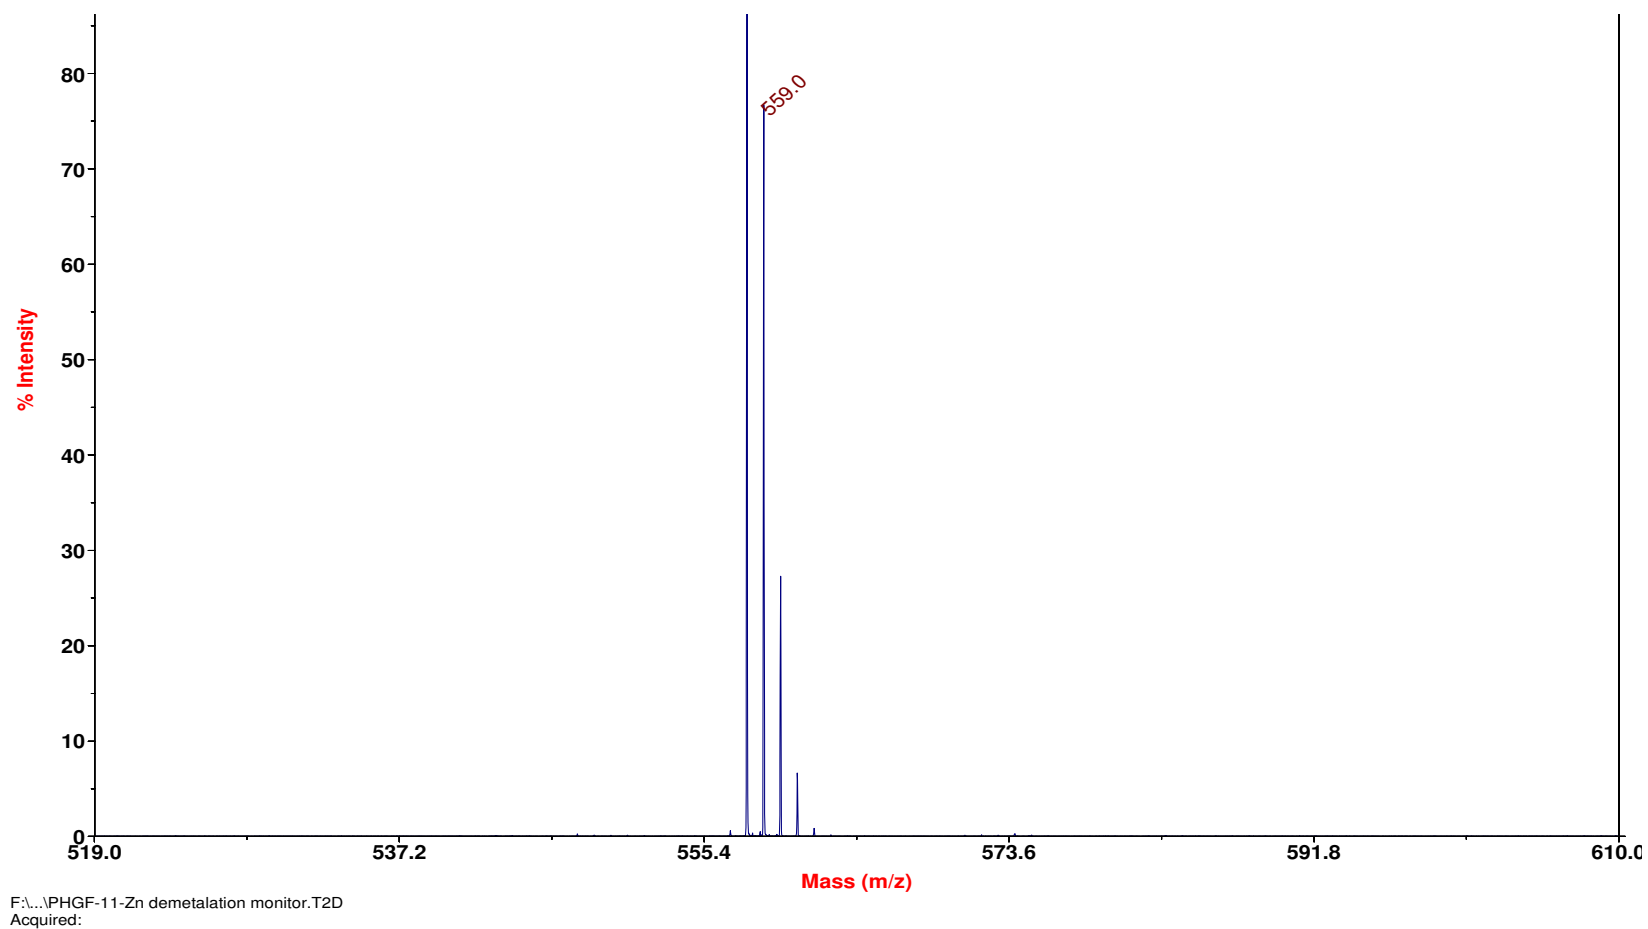

**Figure S7.** The MALDI-MS spectrum of **2-TMS**.



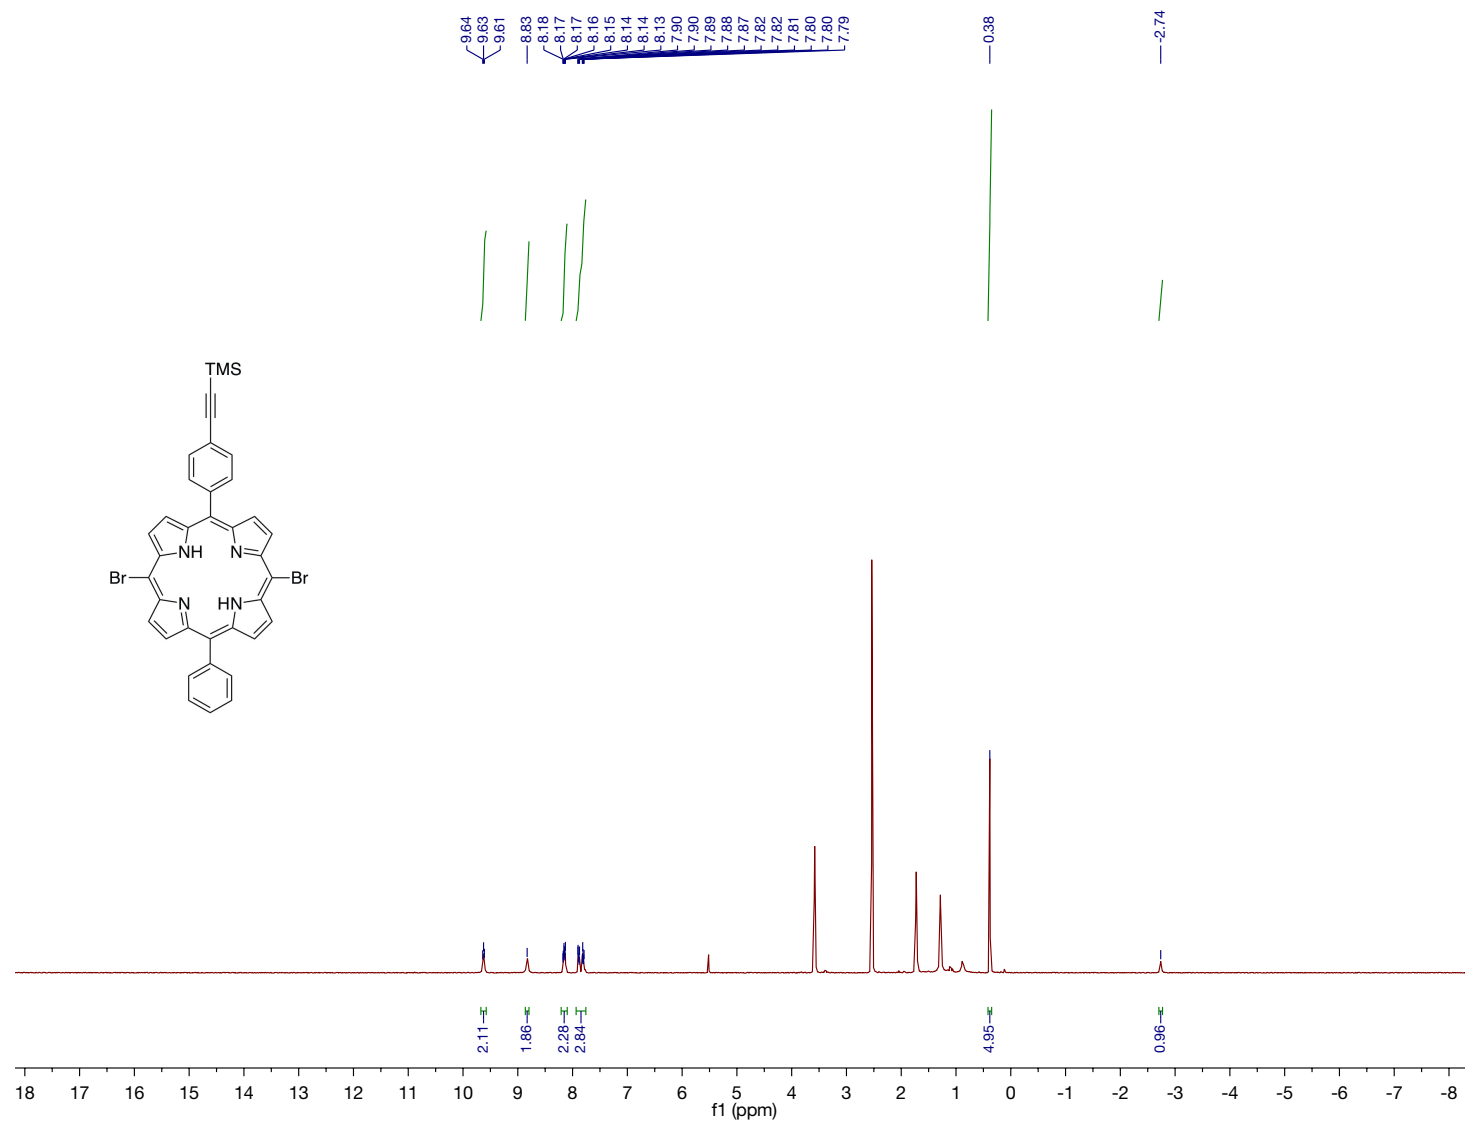

Figure S8. The <sup>1</sup>H NMR spectrum of 2-Br<sub>2</sub>/TMS.

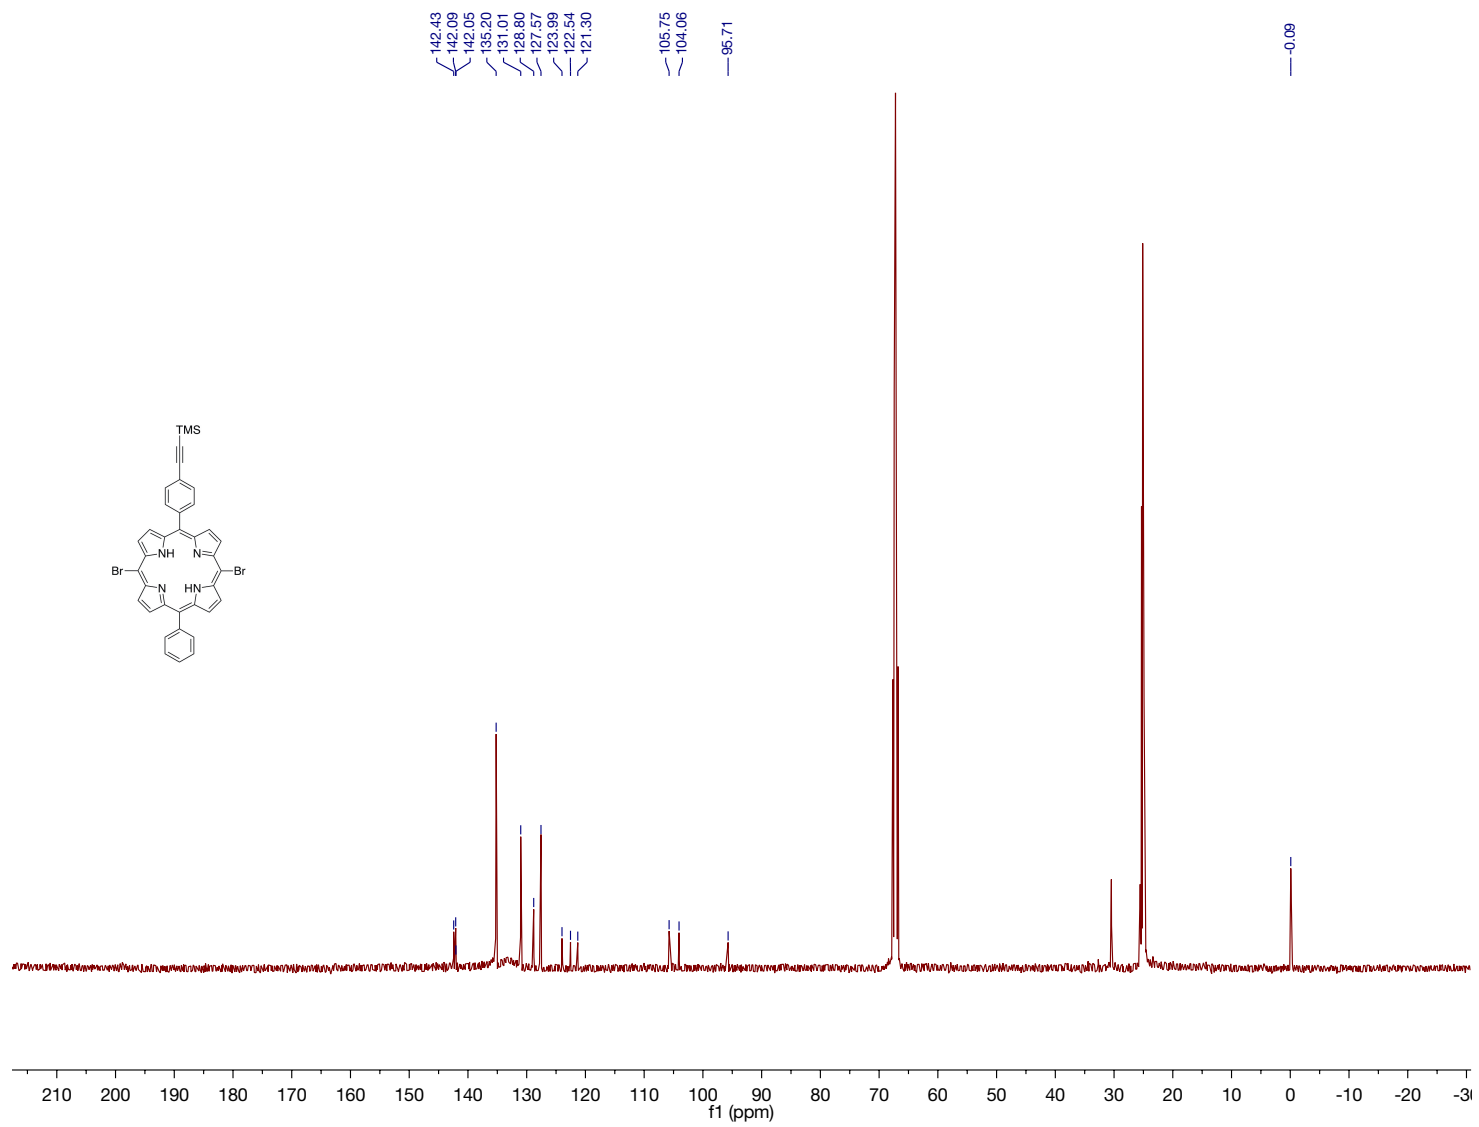

**Figure S9.** The  $^{13}\text{C}$  NMR spectrum of 2-Br<sub>2</sub>/TMS.

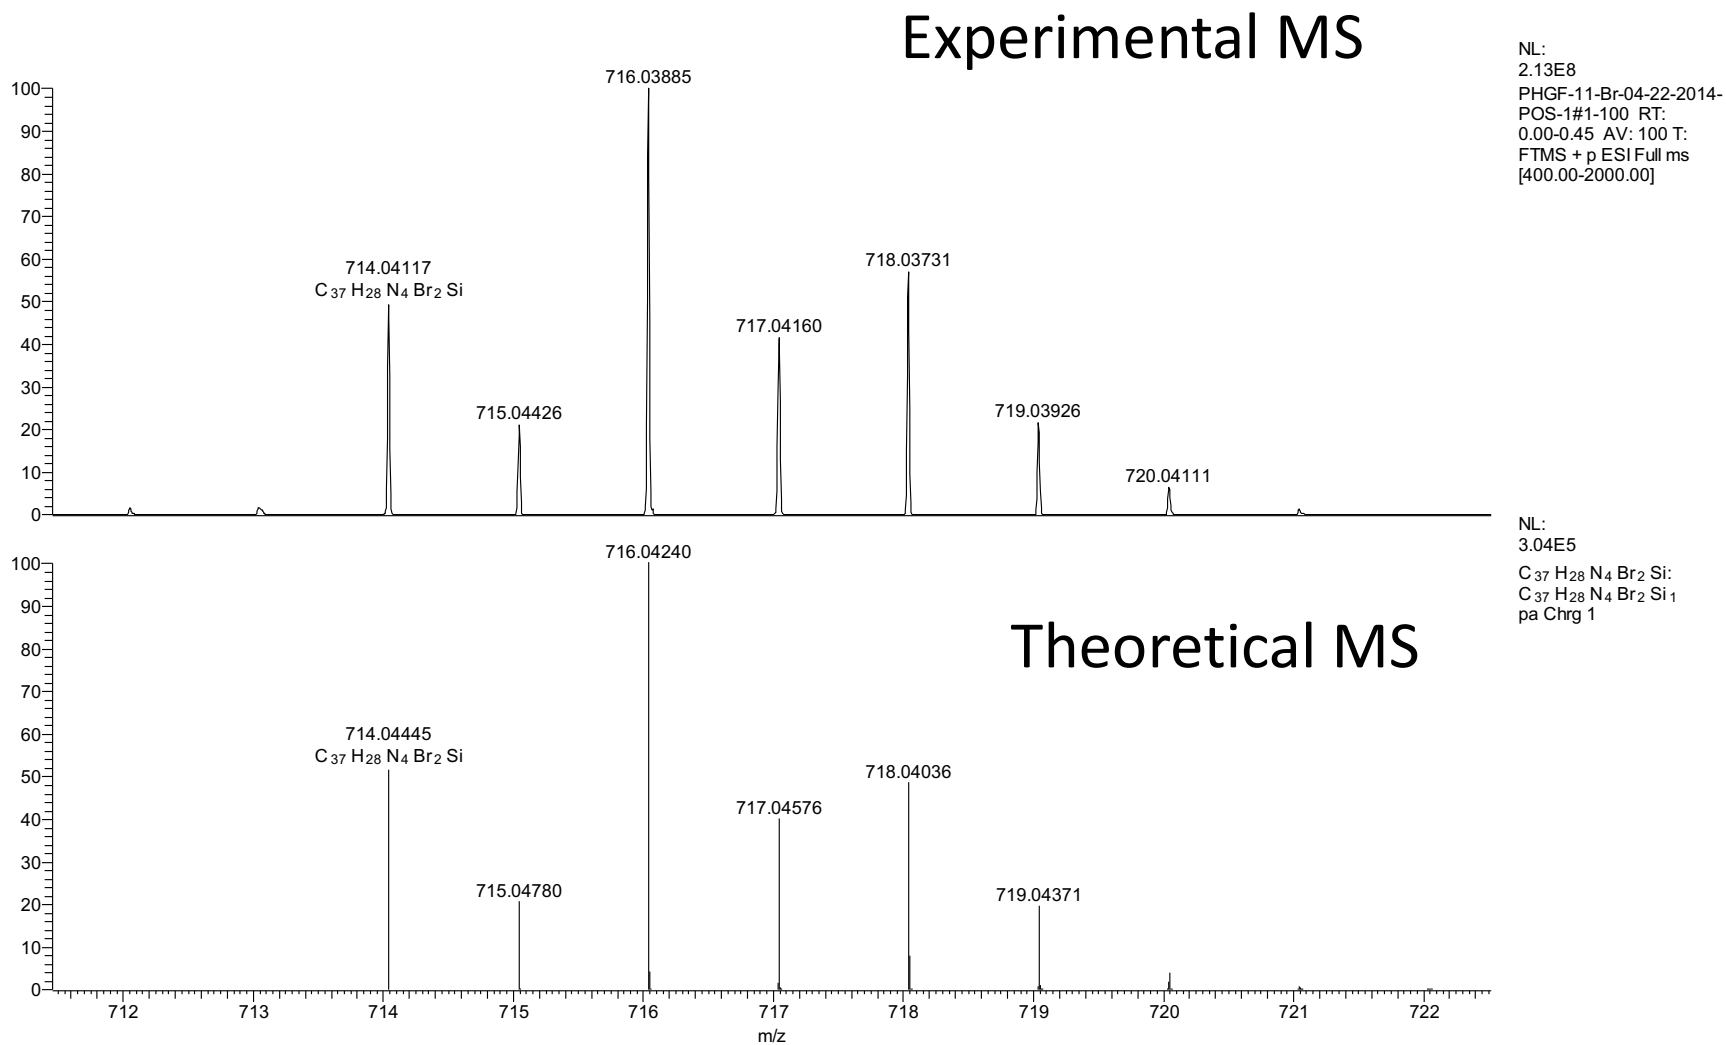

**Figure S10.** The ESI-MS spectrum of **2-Br<sub>2</sub>/TMS**.

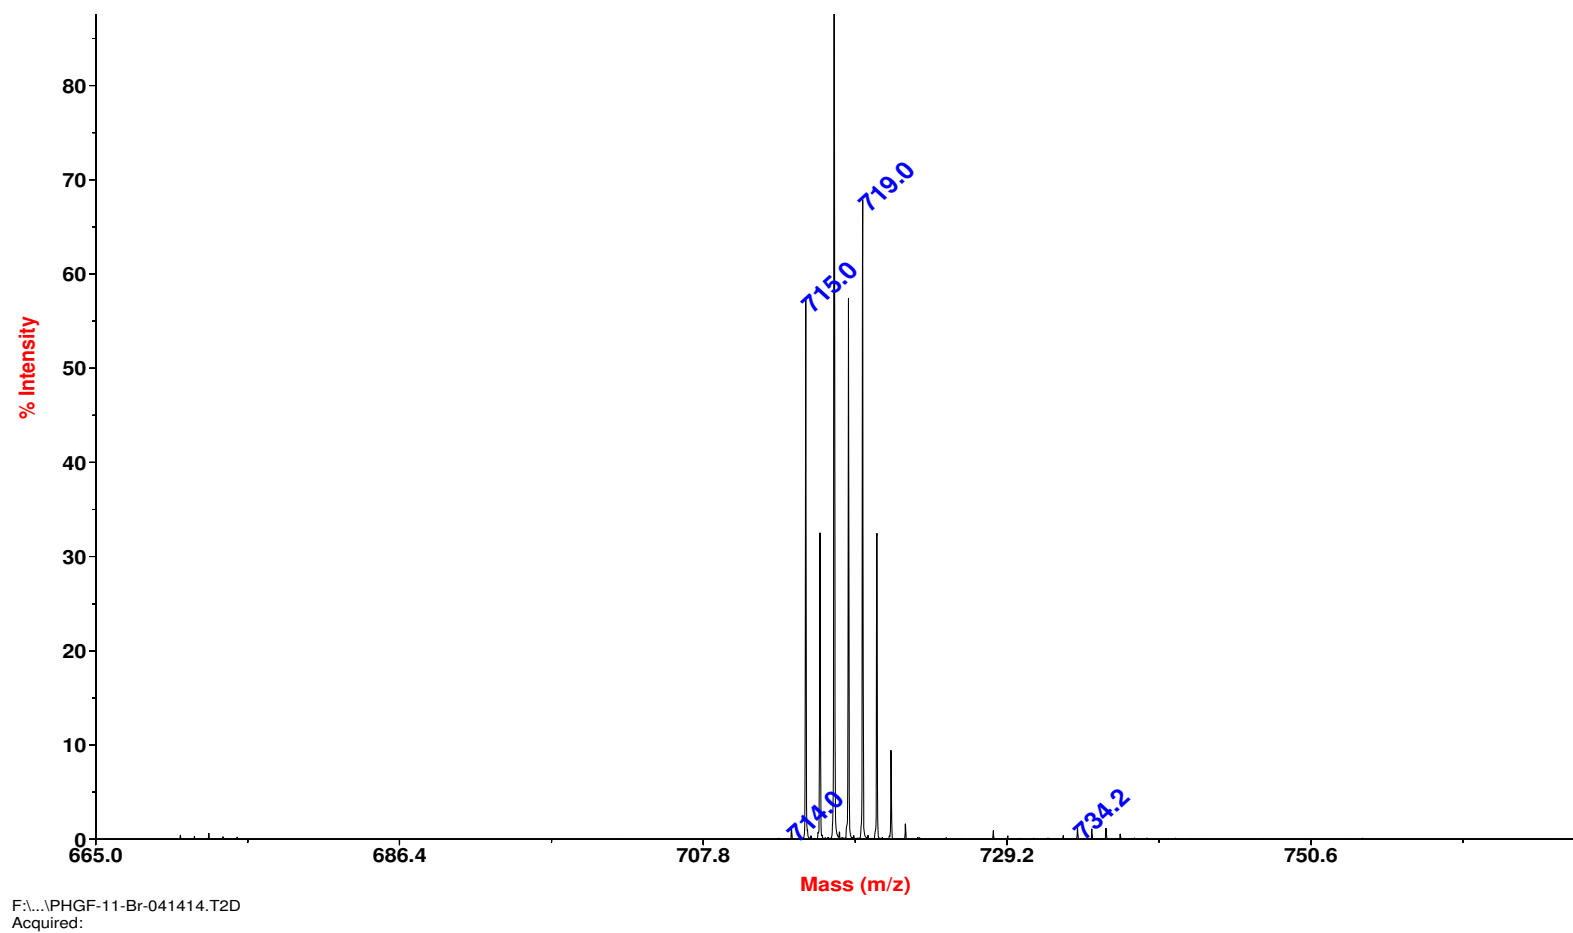

**Figure S11.** The MALDI-MS spectrum of **2-Br<sub>2</sub>/TMS**.

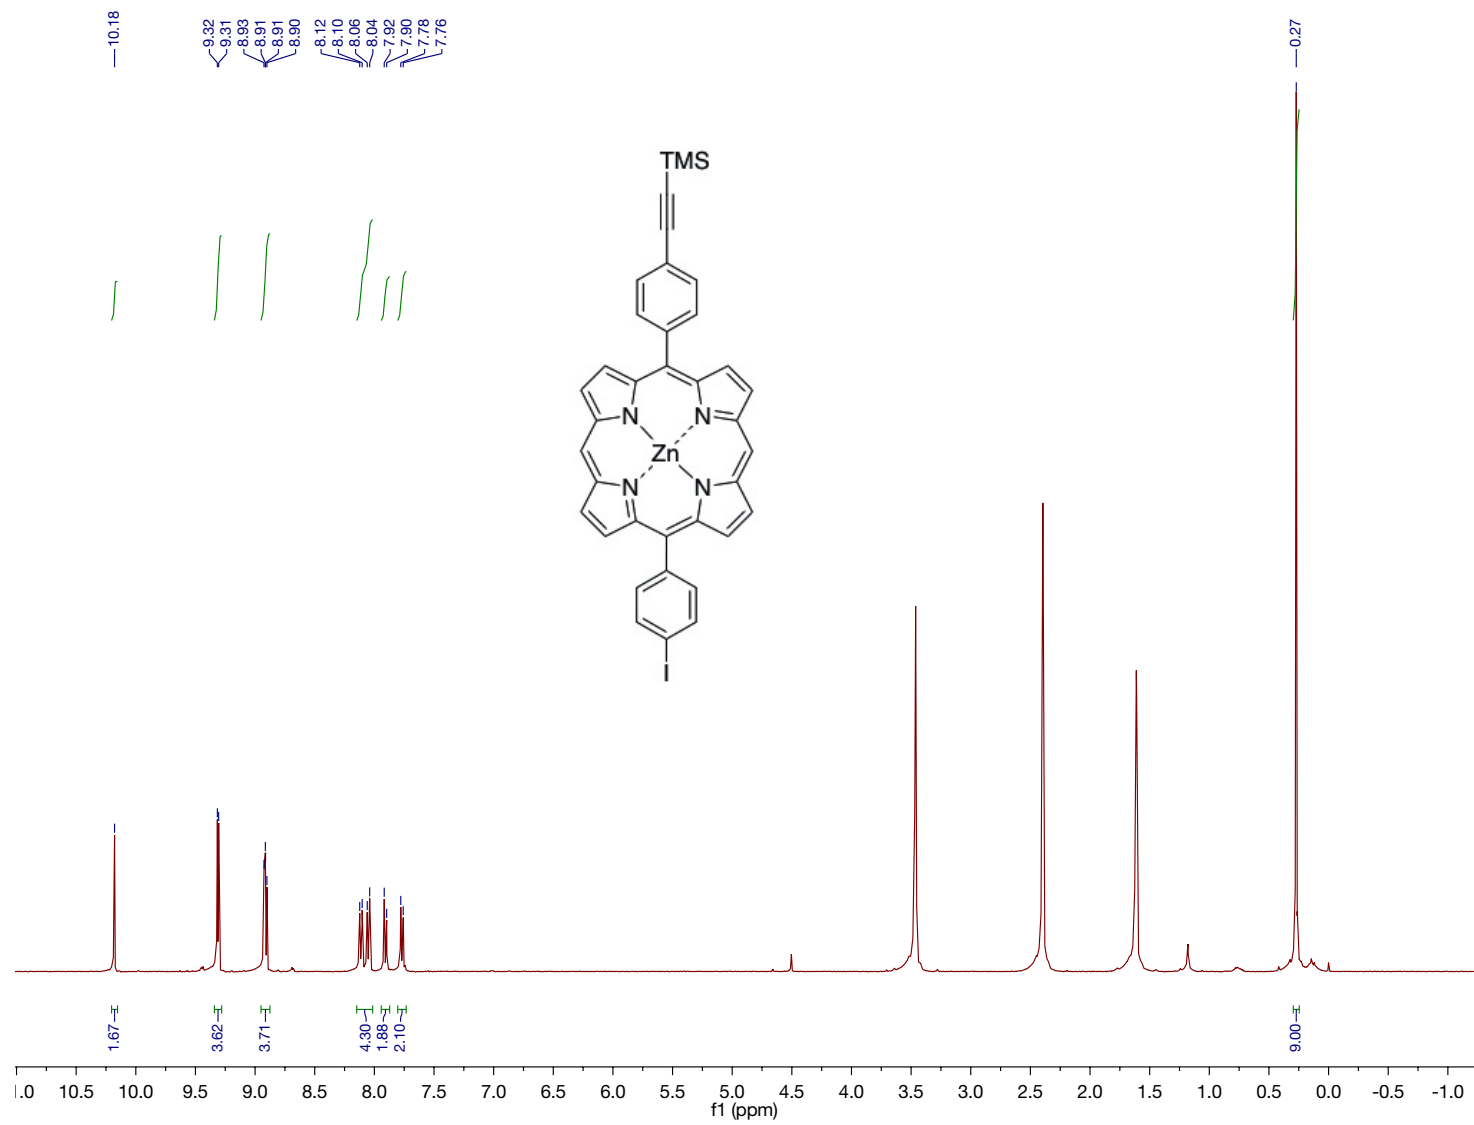

Figure S12. The  $^1\text{H}$  NMR spectrum of Zn4-I/TMS.

**MS Data**

**ZnP-TMS5I15 Experimental and Theoretical Isotopic Distribution for  $C_{37}H_{27}IN_4SiZn$ ,  $[M+H]^+$**

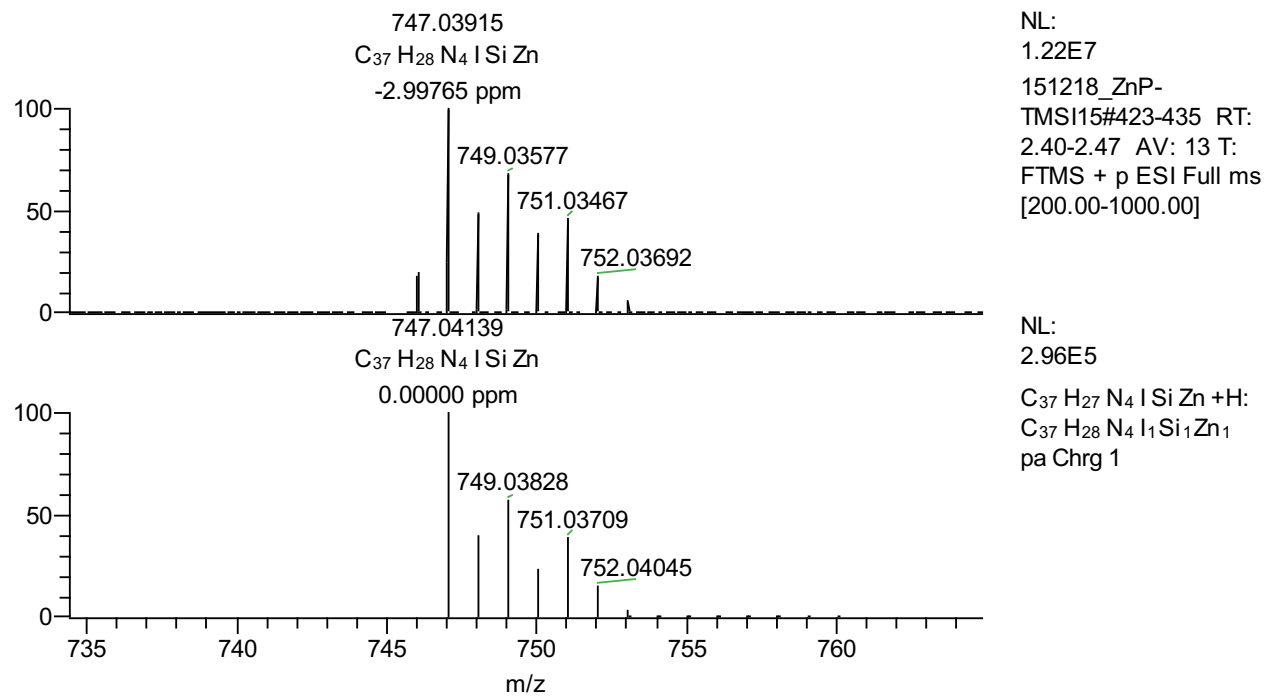

**Figure S13.** The ESI-MS spectrum of **Zn4-I/TMS**.

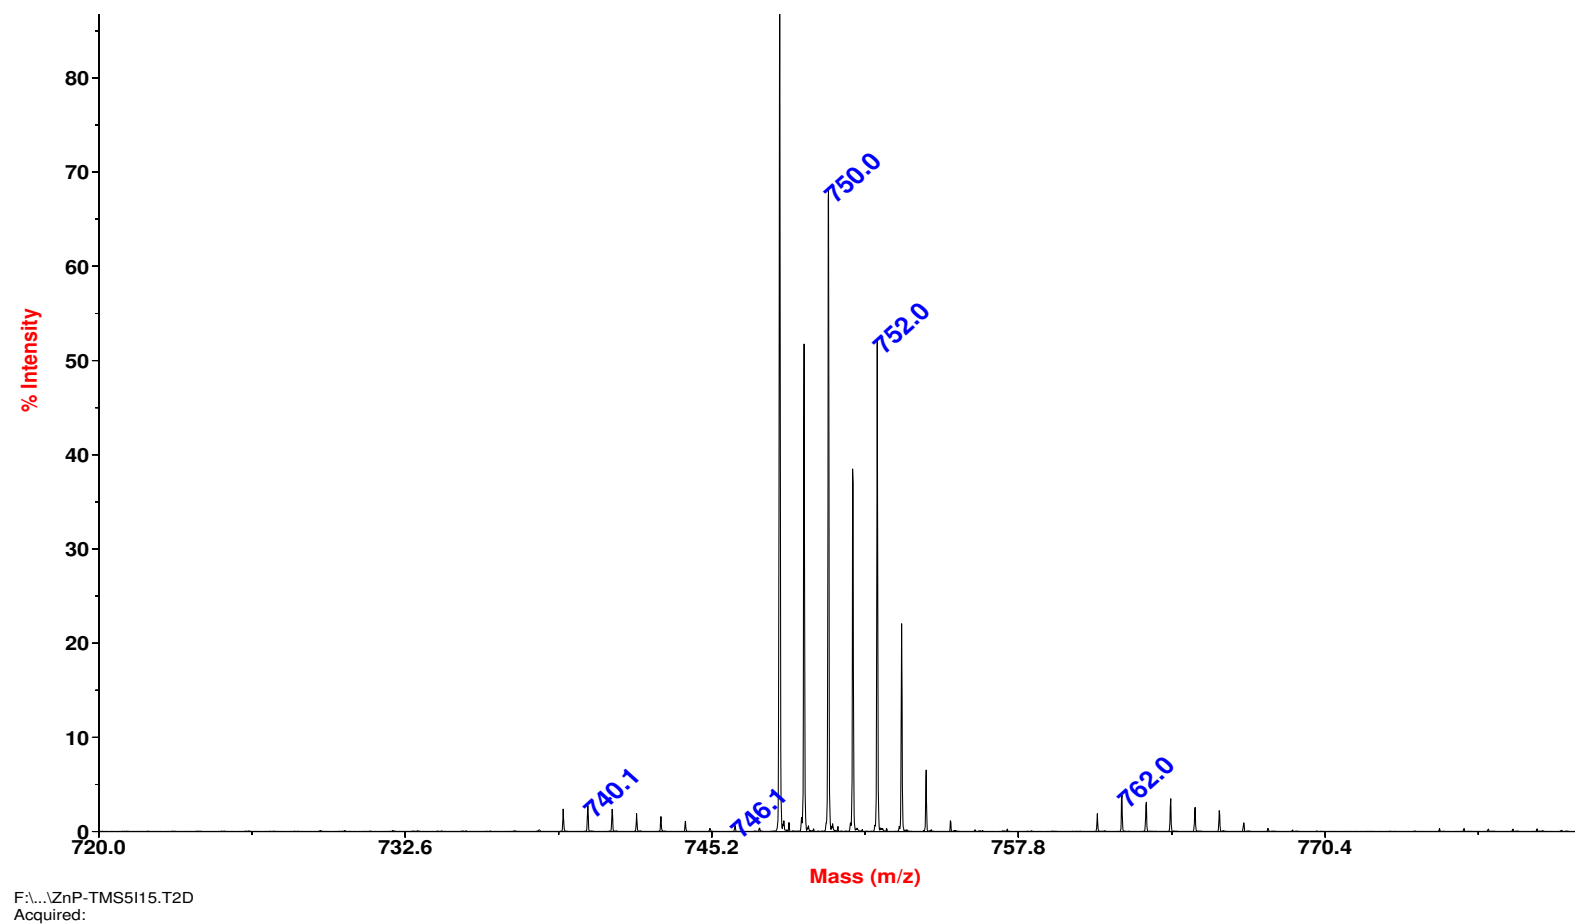

**Figure S14.** The MALDI-MS spectrum of **Zn4-I/TMS**.

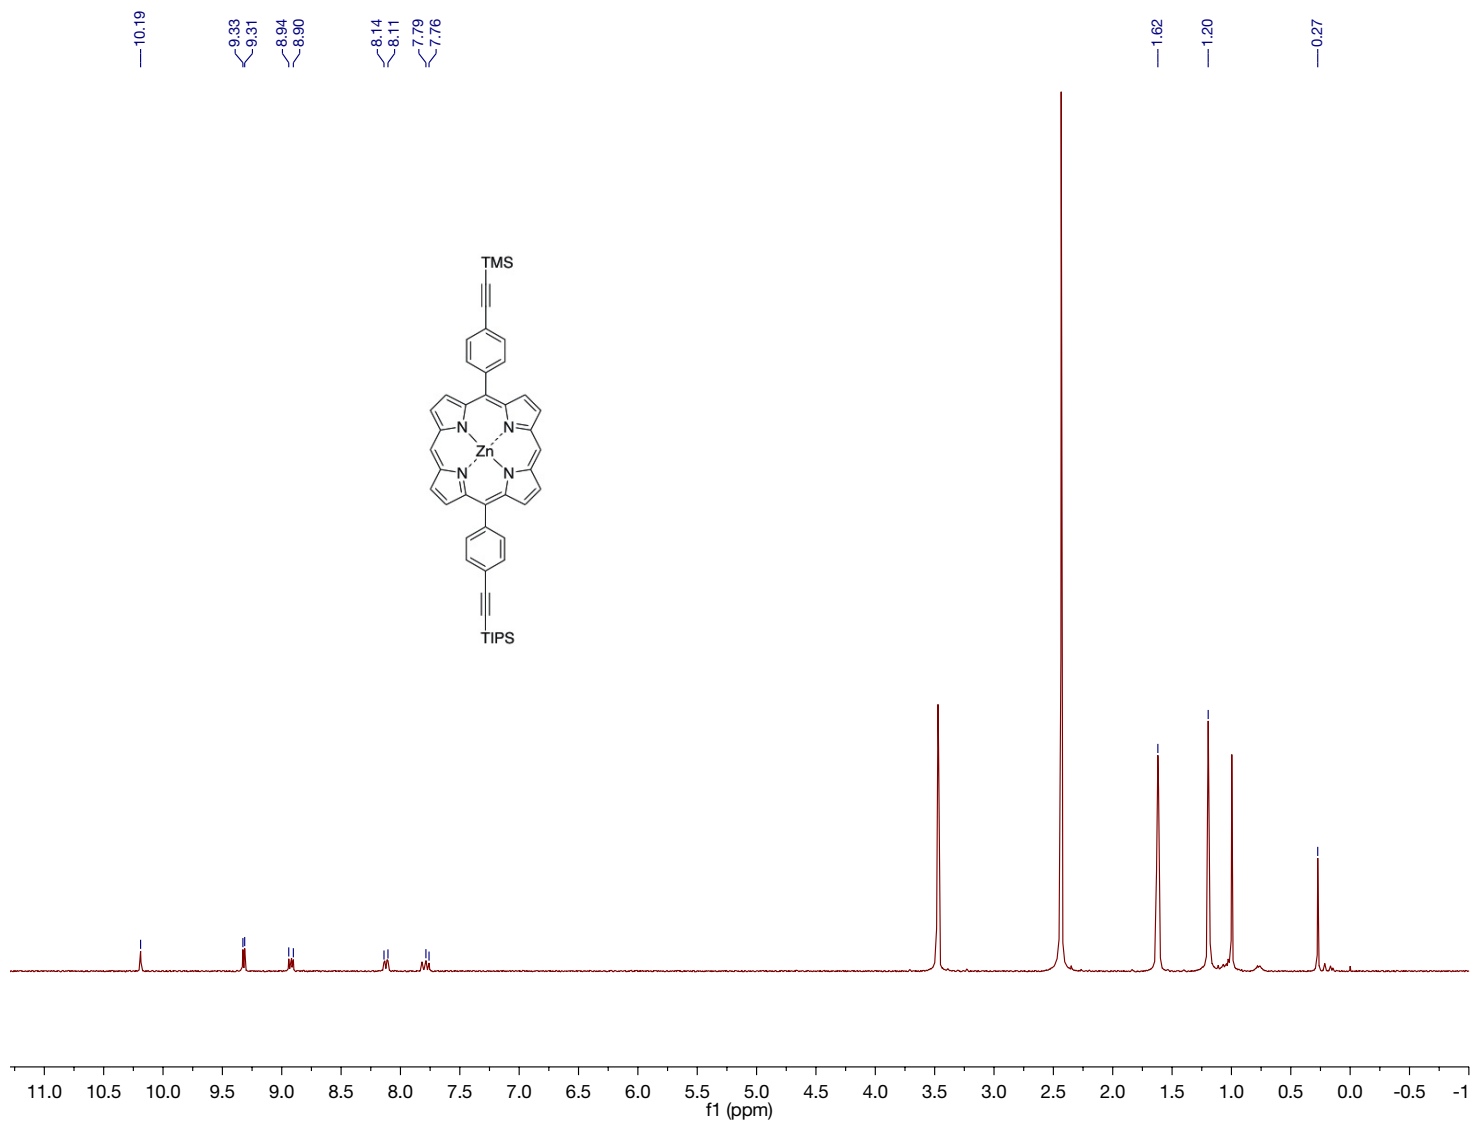

**Figure S15.** The  $^1\text{H}$  NMR spectrum of Zn4-TMS/TIPS.



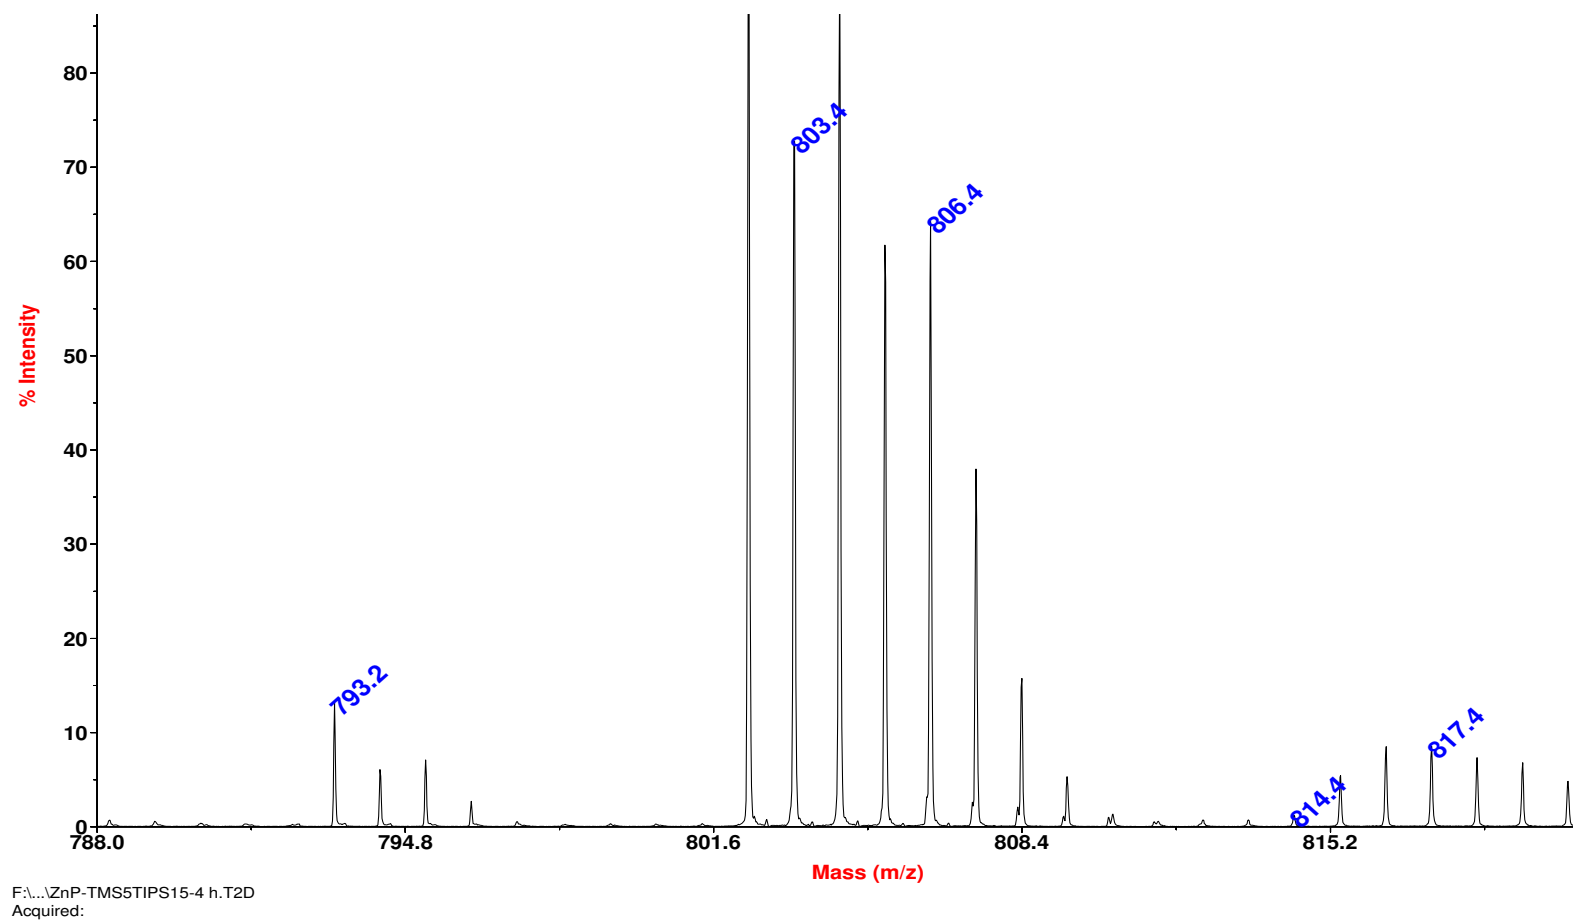

**Figure S16.** The MALDI-MS spectrum of **Zn<sub>4</sub>-TMS/TIPS**.

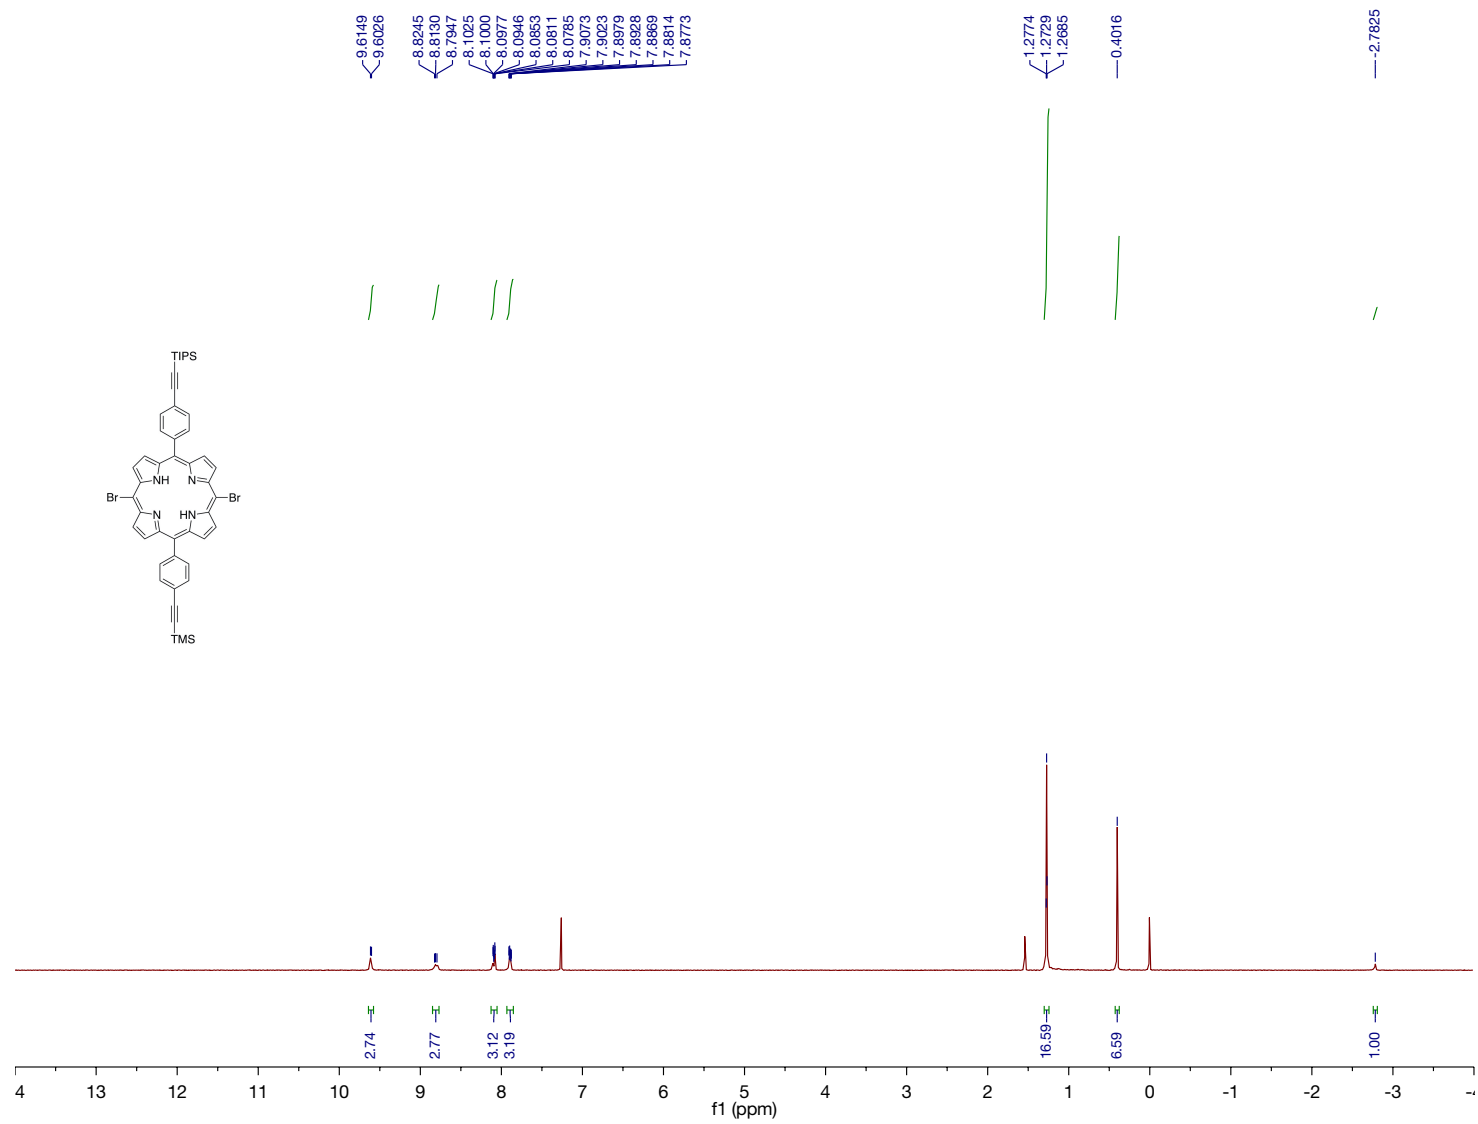

**Figure S17.** The <sup>1</sup>H NMR spectrum of 4-Br<sub>2</sub>/TMS/TIPS.

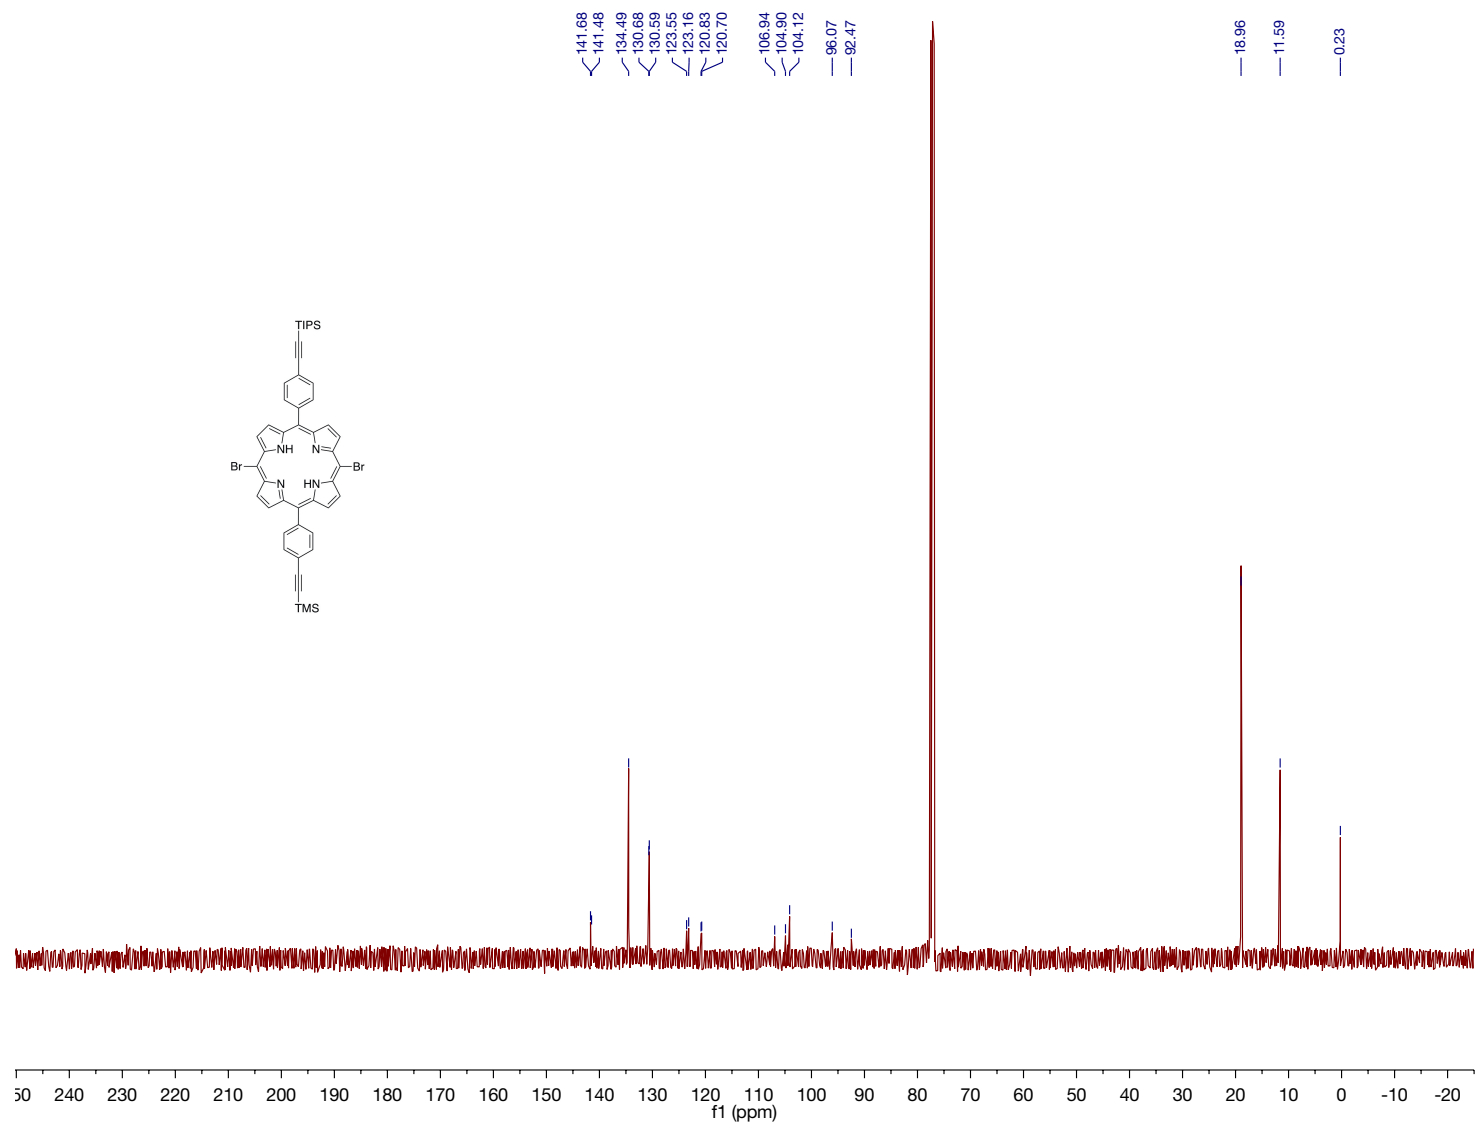

Figure S18. The  $^{13}\text{C}$  NMR spectrum of 4-Br<sub>2</sub>/TMS/TIPS.

| Sample            | M <sub>Theoretical</sub>      | M <sub>Experimental</sub>     | ΔM (ppm) | Elemental Composition                                                          |
|-------------------|-------------------------------|-------------------------------|----------|--------------------------------------------------------------------------------|
| FbP-TMS5TIPS15Br2 | 895.18570<br>[M] <sup>+</sup> | 895.18357<br>[M] <sup>+</sup> | -2.386   | C <sub>48</sub> H <sub>49</sub> Br <sub>2</sub> N <sub>4</sub> Si <sub>2</sub> |

### MS Data

#### FbP-TMS5TIPS15Br2 Experimental and Theoretical Isotopic Distribution for C<sub>48</sub>H<sub>49</sub>Br<sub>2</sub>N<sub>4</sub>Si<sub>2</sub>, [M+H]<sup>+</sup>

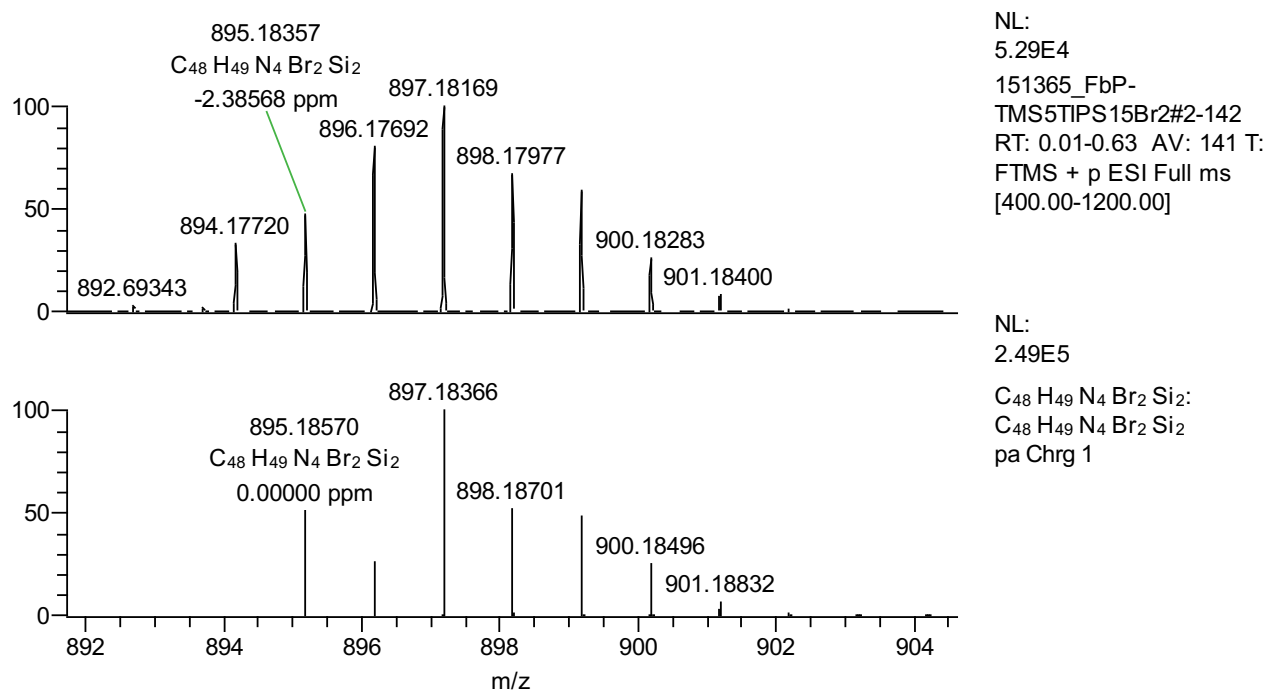

**Figure S19.** The ESI-MS spectrum of 4-Br<sub>2</sub>/TMS/TIPS.

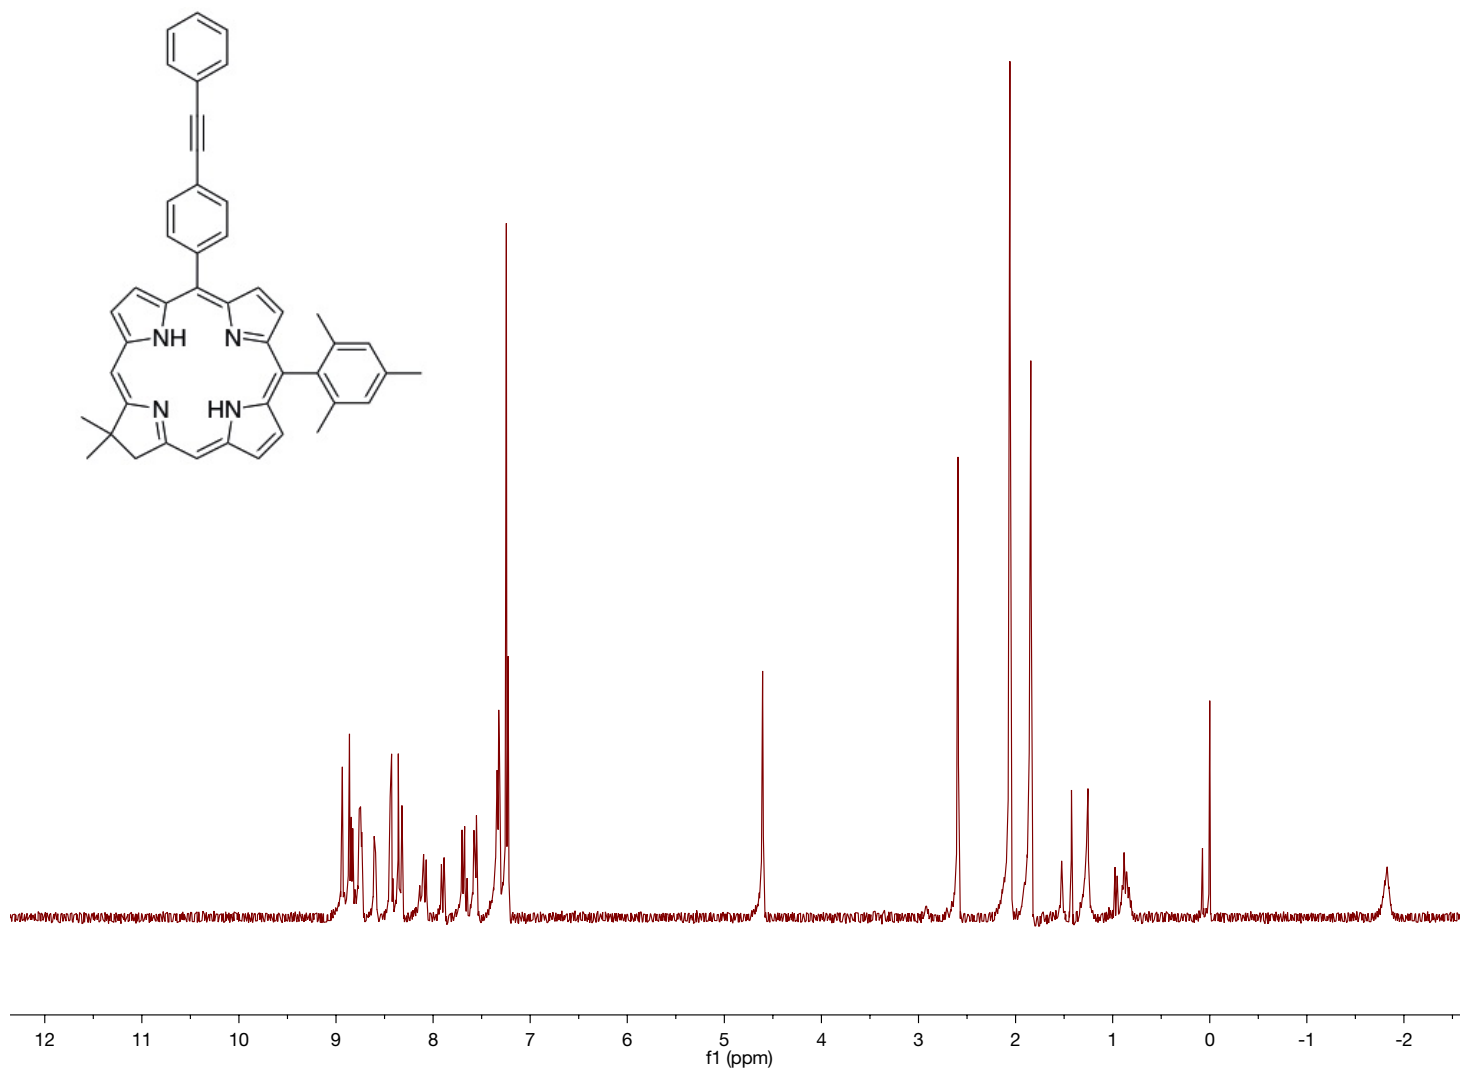

**Figure S20.** The <sup>1</sup>H NMR spectrum of **C-Ph**.

| Sample  | M <sub>Theoretical</sub>        | M <sub>Experimental</sub>       | ΔM (ppm) | Elemental Composition                          |
|---------|---------------------------------|---------------------------------|----------|------------------------------------------------|
| FbC-pep | 635.31692<br>[M+H] <sup>+</sup> | 635.31711<br>[M+H] <sup>+</sup> | 0.287    | C <sub>45</sub> H <sub>38</sub> N <sub>4</sub> |

### MS Data

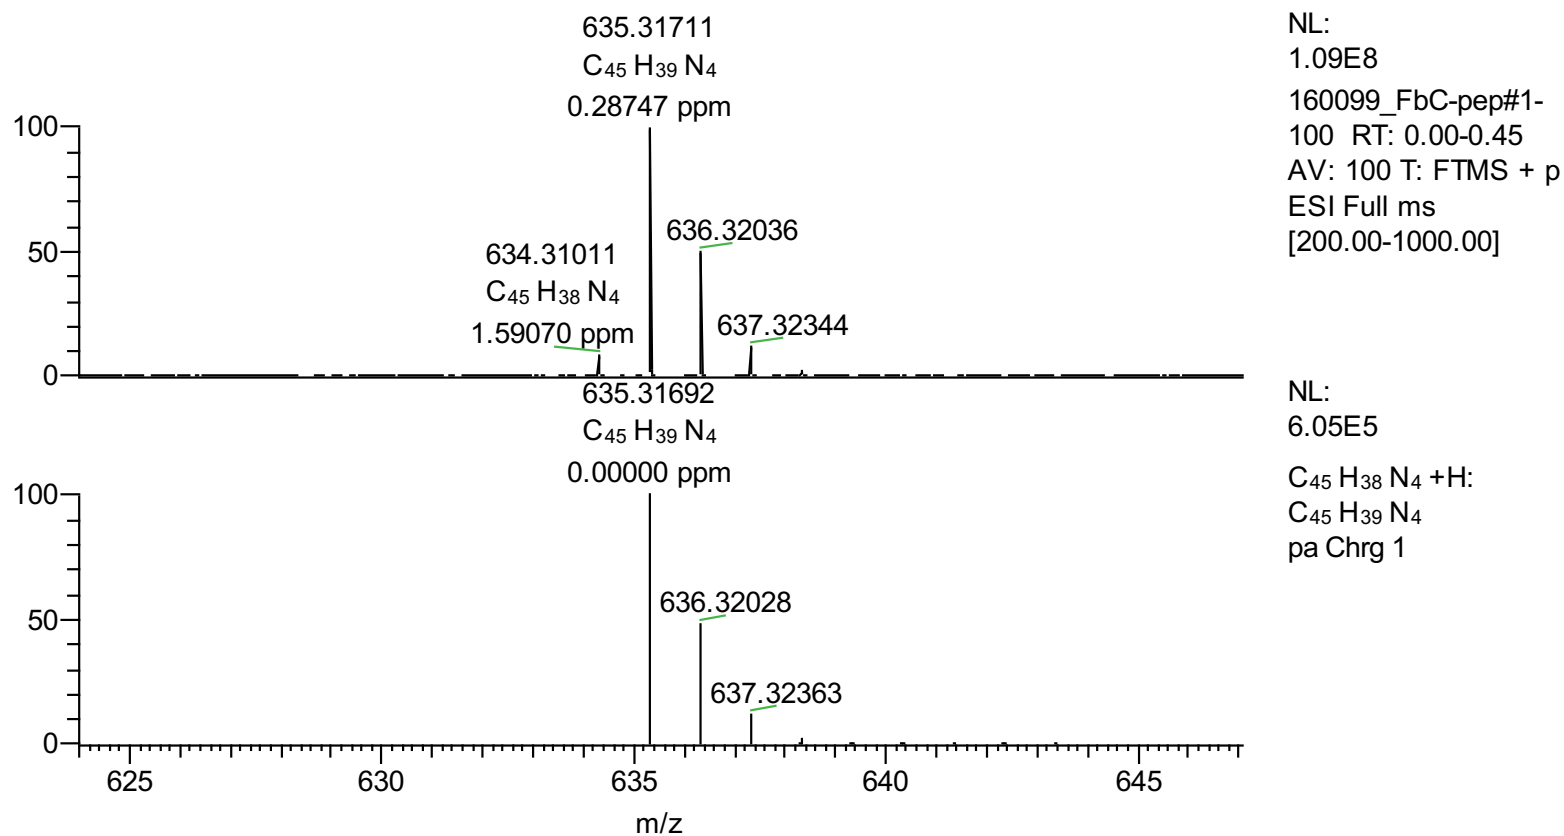

**Figure S21.** The ESI-MS spectrum of **C-Ph**.

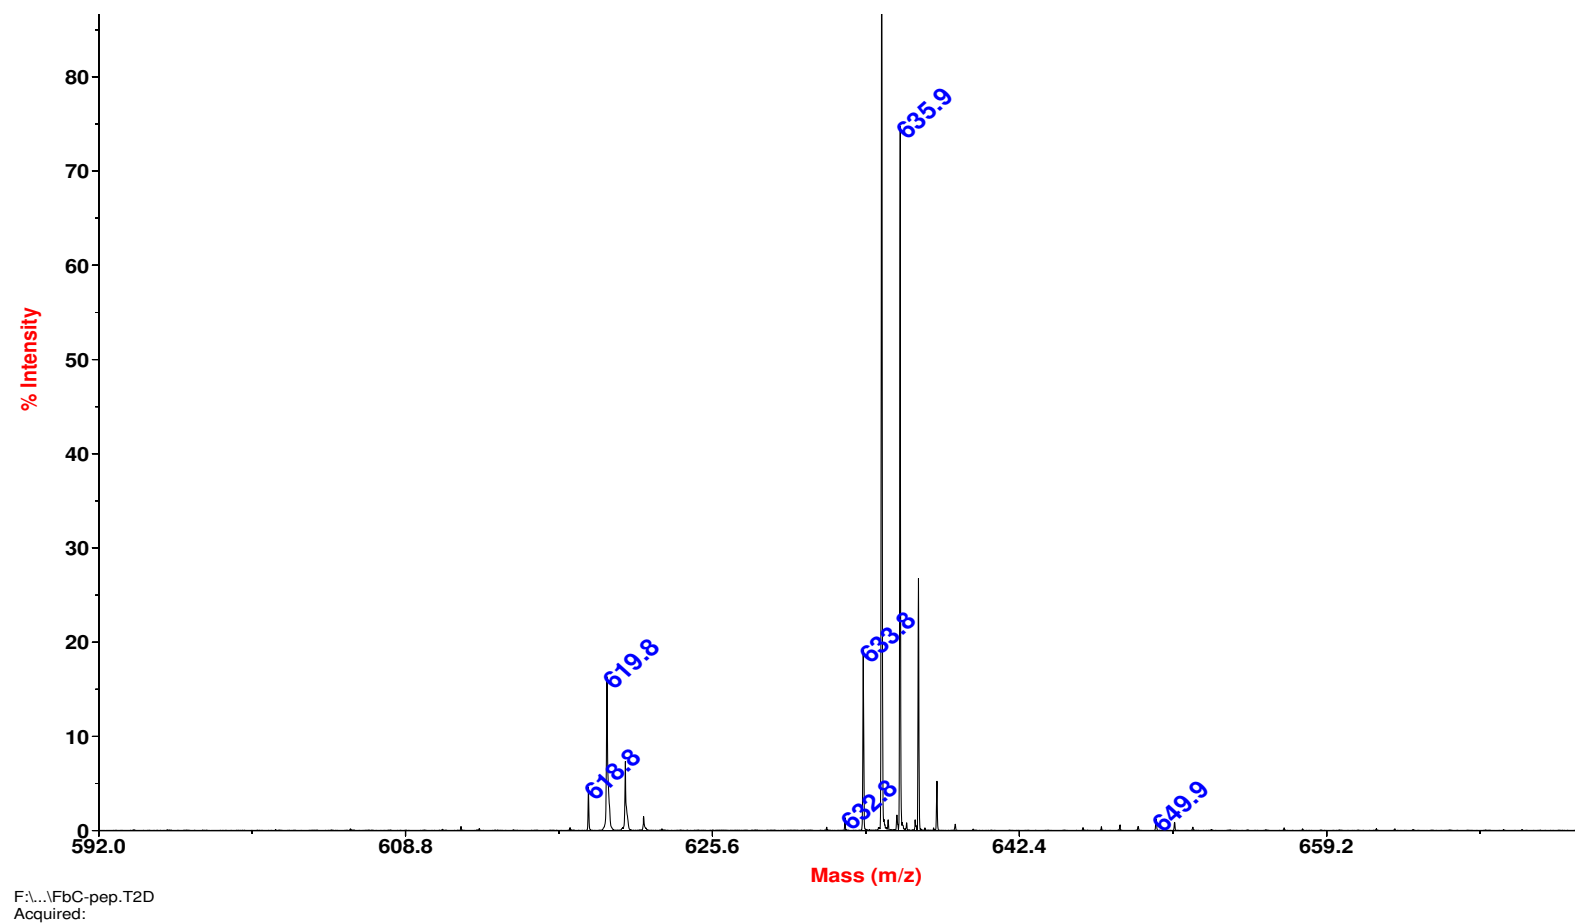

**Figure S22.** The MALDI-MS spectrum of **C-Ph**.

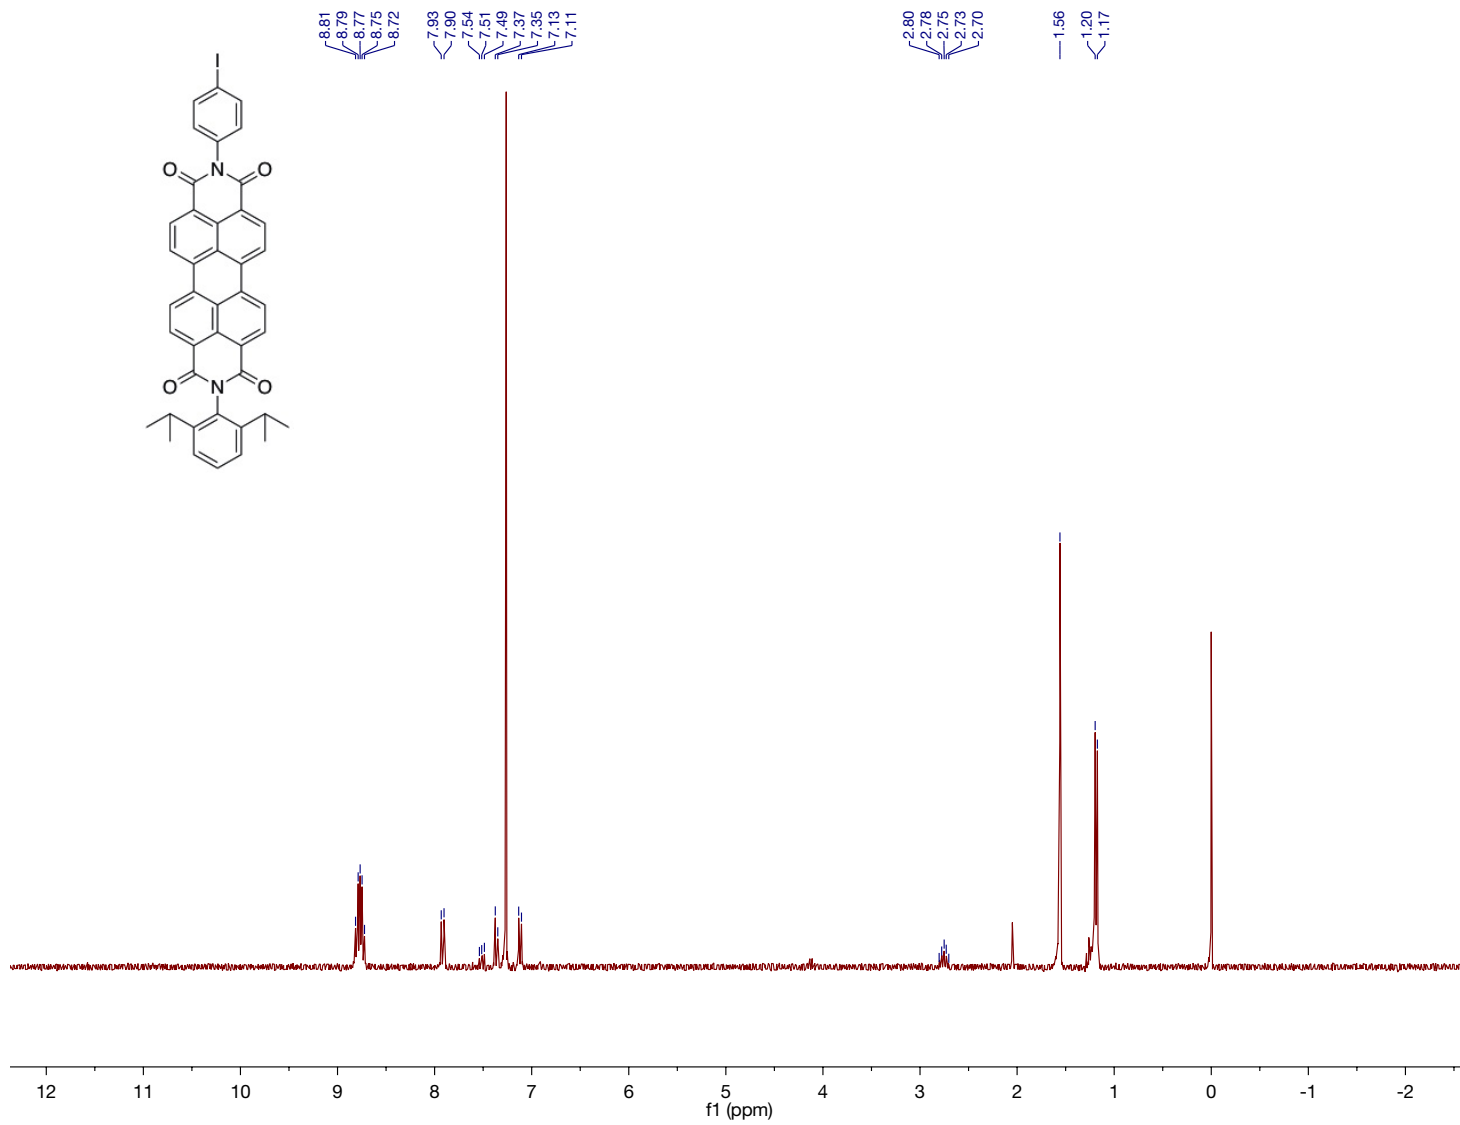

Figure S23. The <sup>1</sup>H NMR spectrum of 7.



| Sample | M <sub>Theoretical</sub>        | M <sub>Experimental</sub>       | ΔM (ppm) | Elemental Composition                                                        |
|--------|---------------------------------|---------------------------------|----------|------------------------------------------------------------------------------|
| PDI-I  | 753.12448<br>[M+H] <sup>+</sup> | 753.12351<br>[M+H] <sup>+</sup> | -1.283   | C <sub>42</sub> H <sub>29</sub> I <sub>1</sub> N <sub>2</sub> O <sub>4</sub> |

### MS Data

#### PDI-I Experimental and Theoretical Isotopic Distribution, C<sub>42</sub>H<sub>29</sub>I<sub>1</sub>N<sub>2</sub>O<sub>4</sub>, [M]<sup>+</sup> and [M+H]<sup>+</sup>

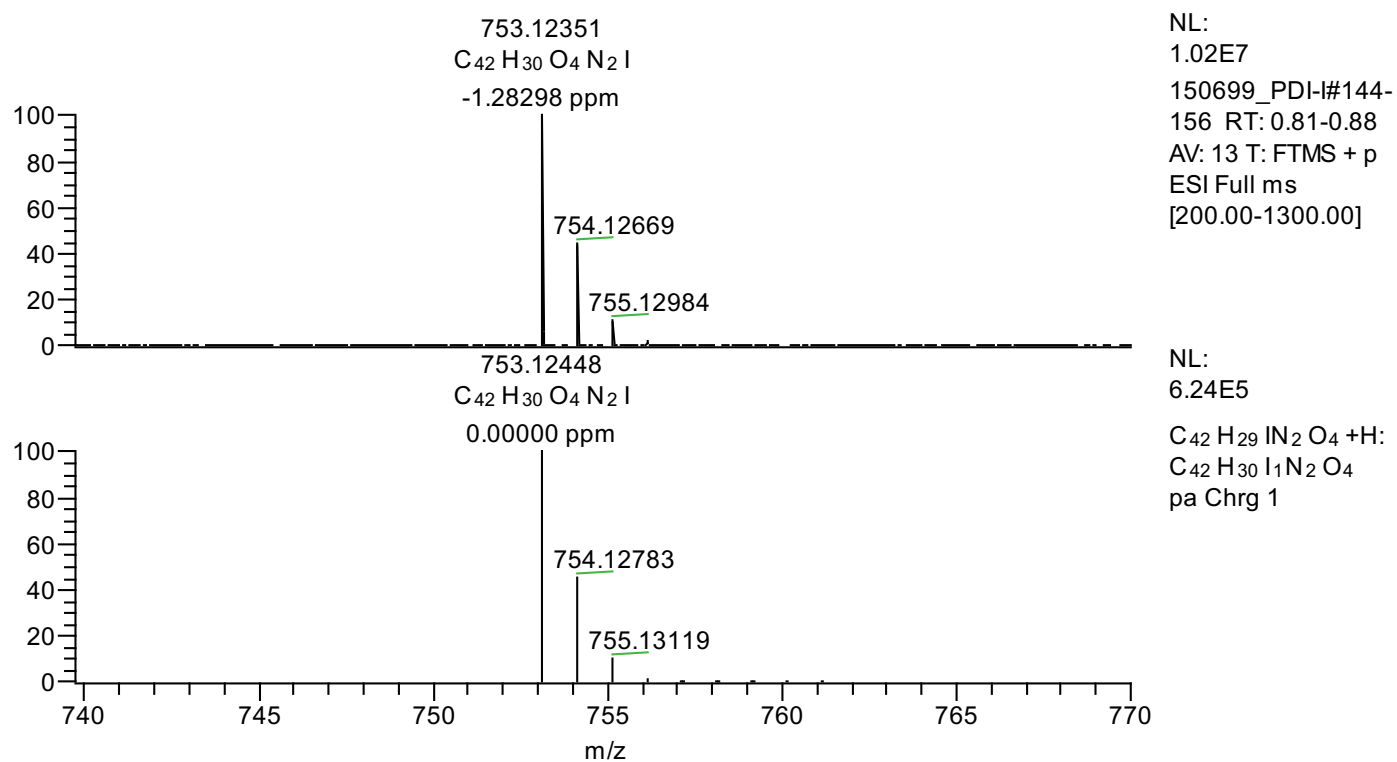

**Figure S24.** The ESI-MS spectrum of 7.

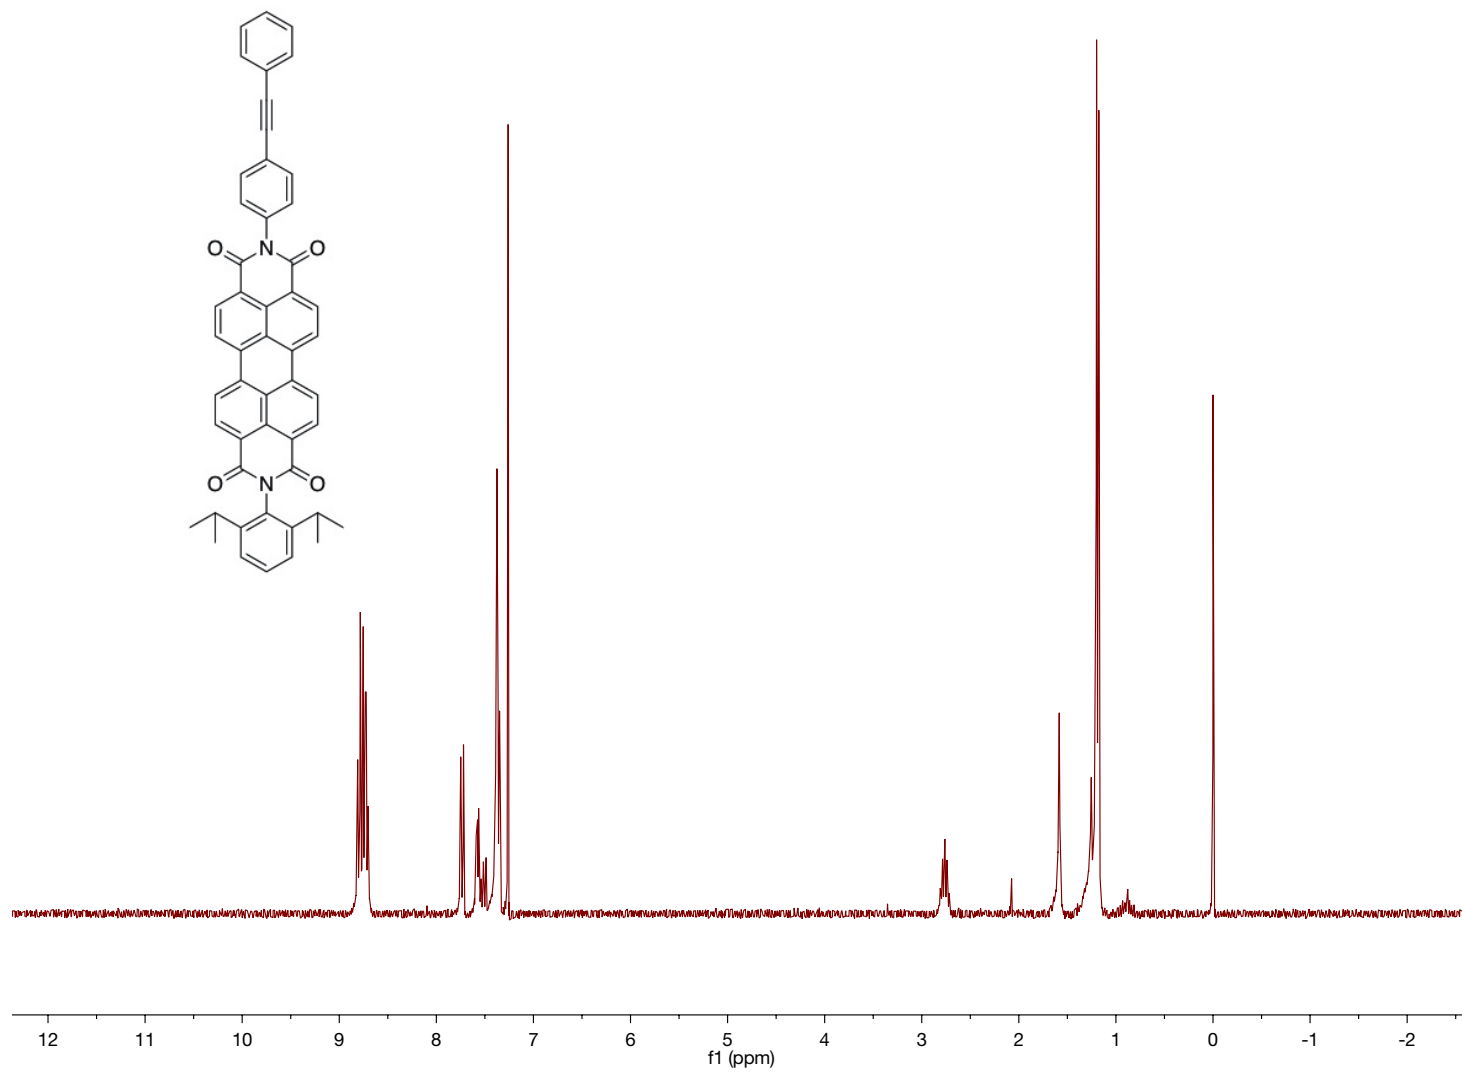

**Figure S25.** The <sup>1</sup>H NMR spectrum of **PDI-Ph**.

| Sample | M <sub>Theoretical</sub>        | M <sub>Experimental</sub>       | ΔM (ppm) | Elemental Composition                                         |
|--------|---------------------------------|---------------------------------|----------|---------------------------------------------------------------|
| PDI    | 727.25913<br>[M+H] <sup>+</sup> | 727.25526<br>[M+H] <sup>+</sup> | -1.204   | C <sub>50</sub> H <sub>34</sub> N <sub>2</sub> O <sub>4</sub> |

### MS Data

#### PDI Experimental and Theoretical Isotopic Distribution for C<sub>50</sub>H<sub>34</sub>N<sub>2</sub>O<sub>4</sub>, [M+H]<sup>+</sup>

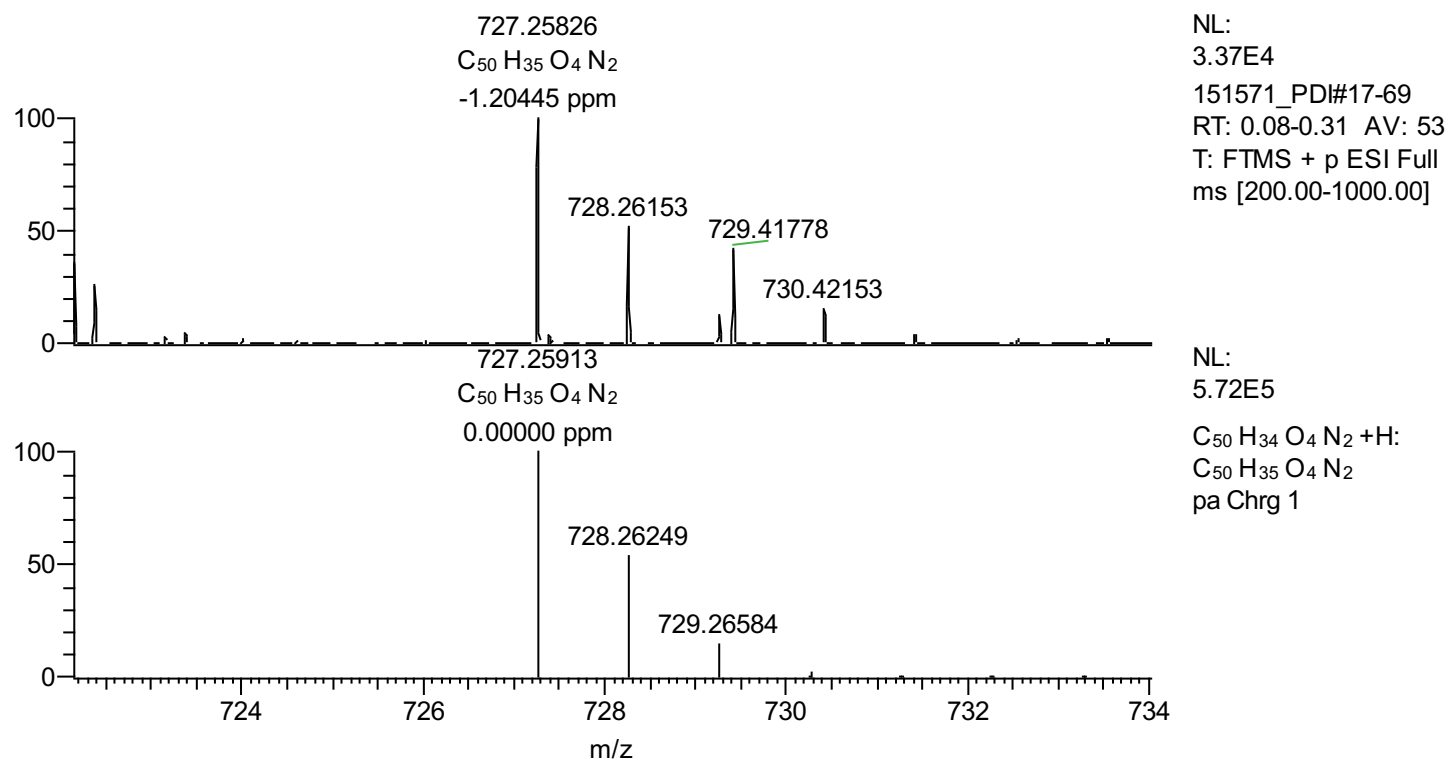

Figure S26. The ESI-MS spectrum of PDI-Ph.

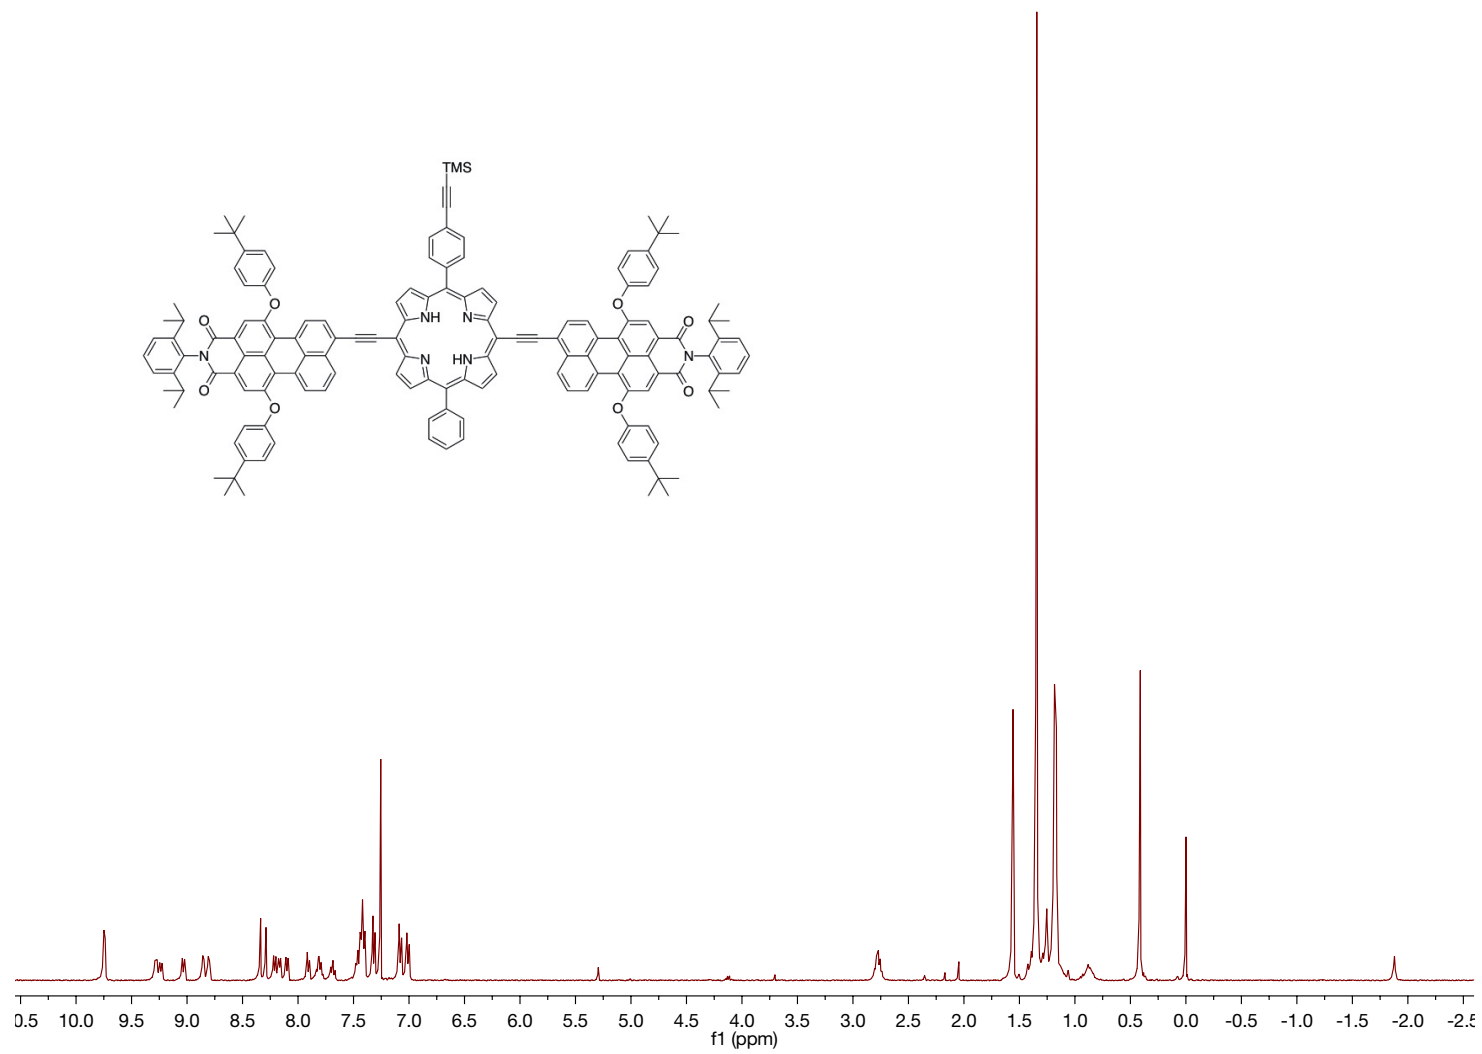

**Figure S27.** The <sup>1</sup>H NMR spectrum of **T-Ph**.

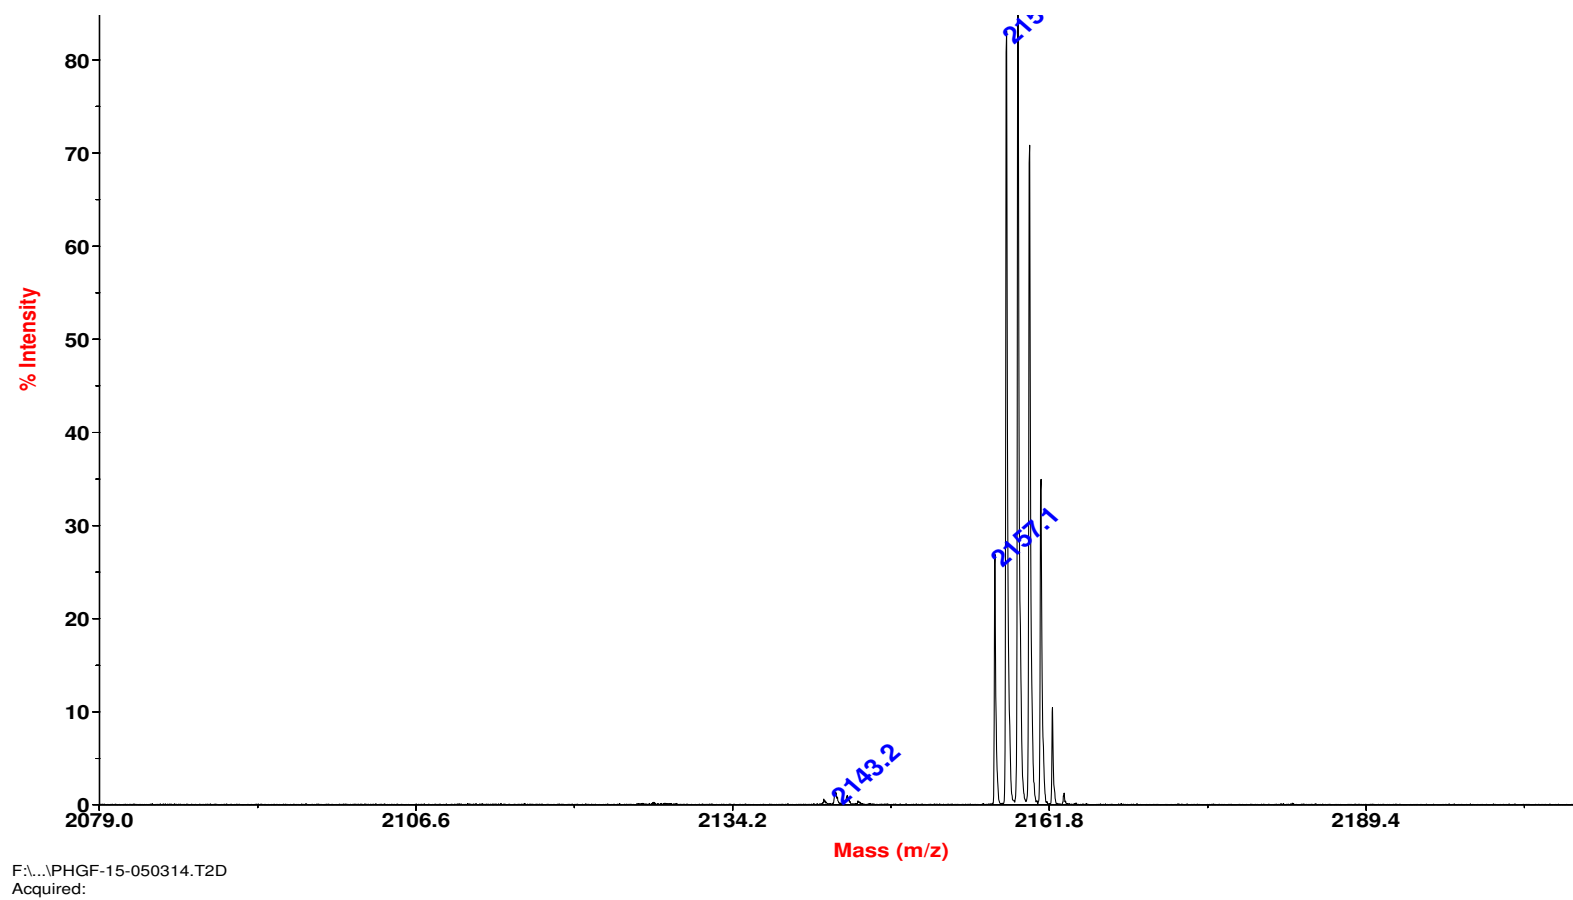

**Figure S28.** The MALDI-MS spectrum of **T-Ph**.

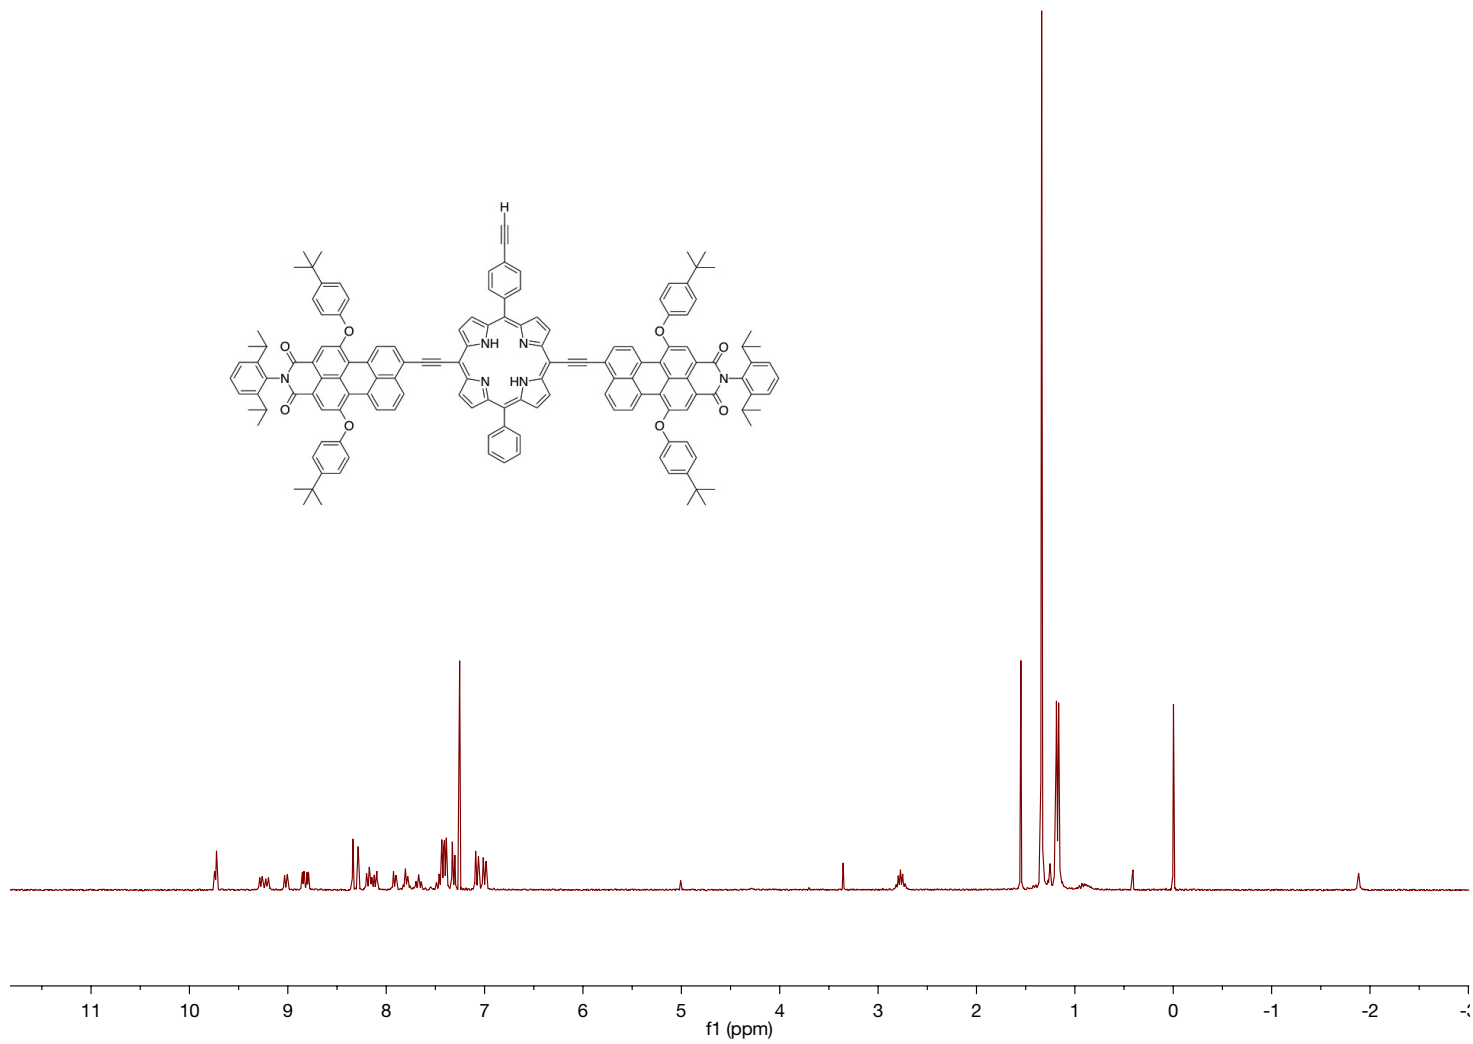

**Figure S29.** The <sup>1</sup>H NMR spectrum of **T-Ph-H**.

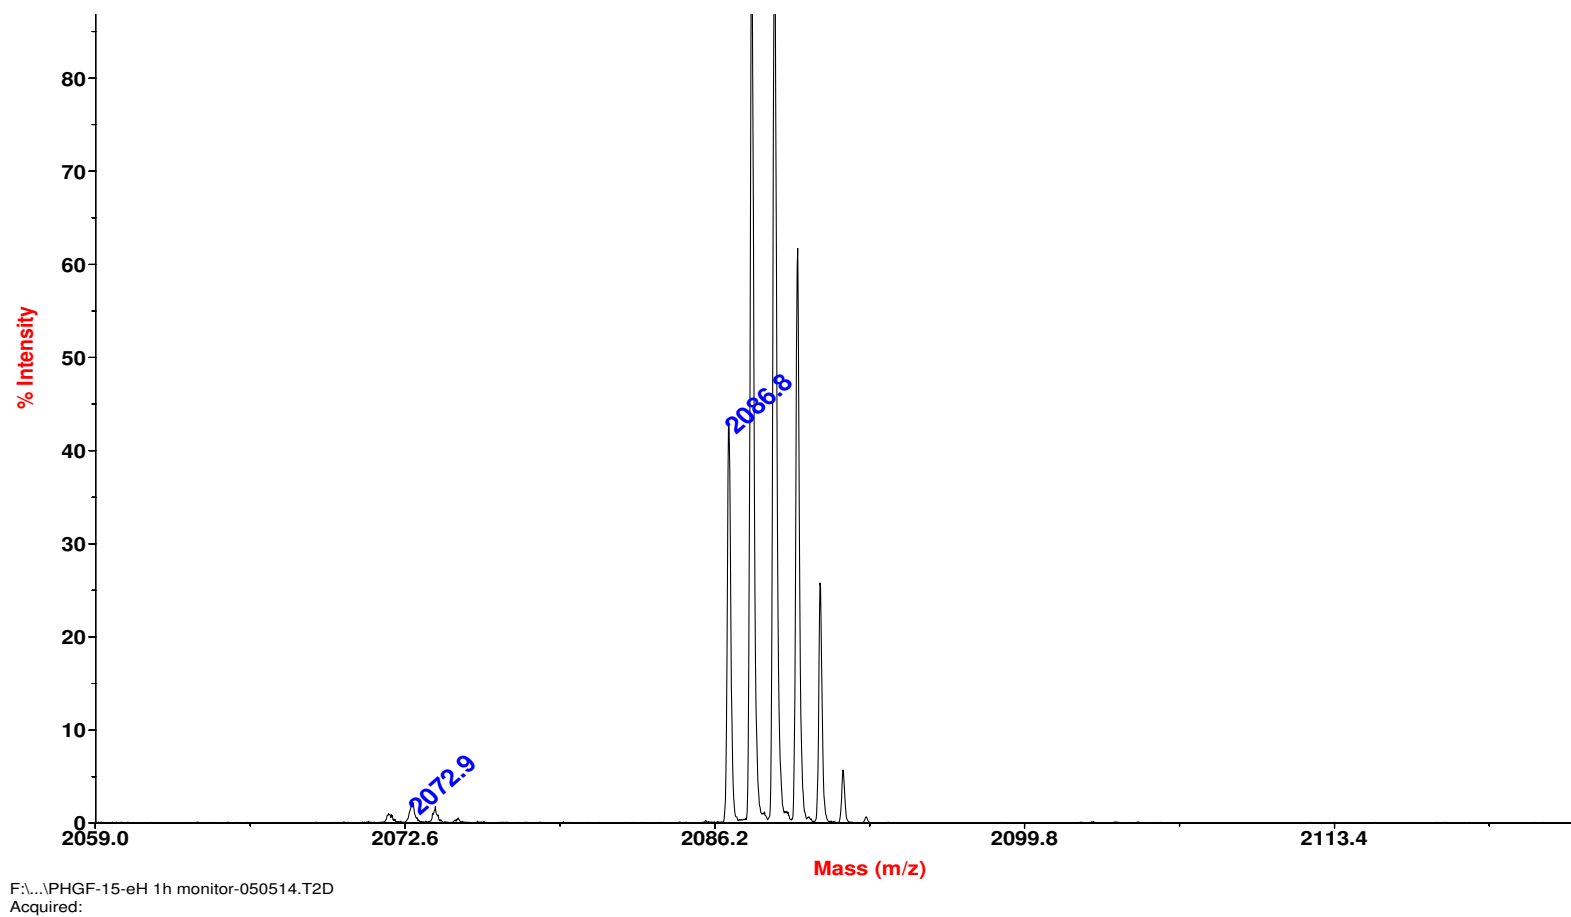

**Figure S30.** The MALDI-MS spectrum of **T-Ph-H**.

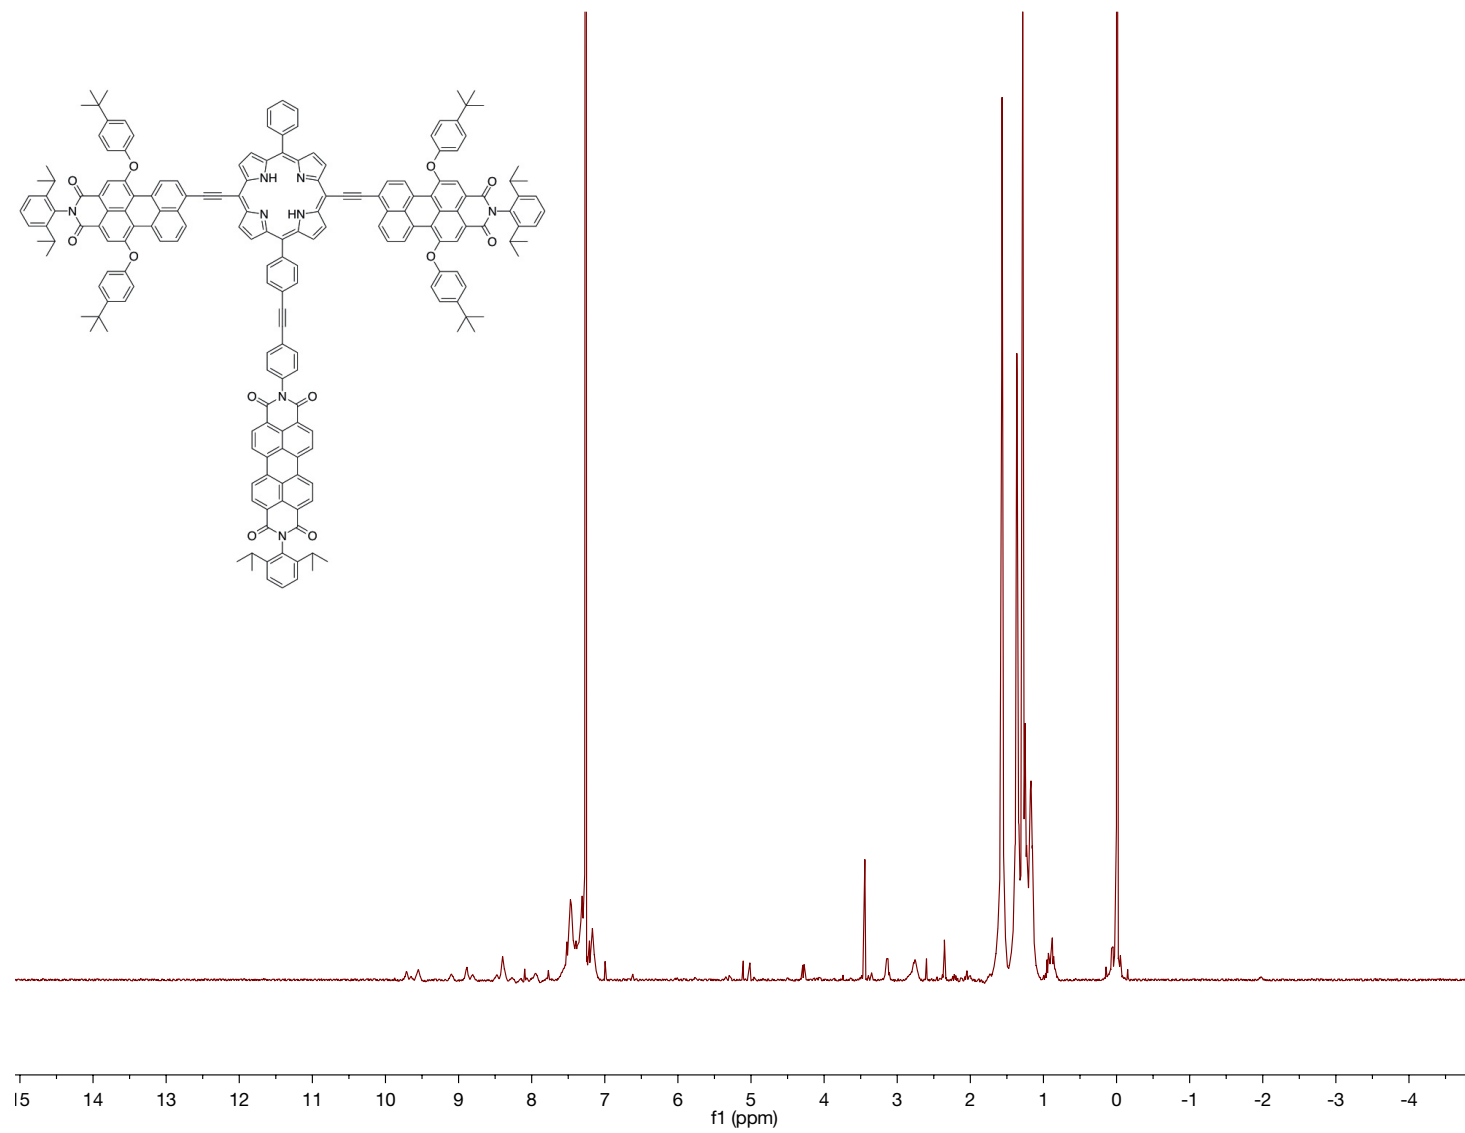

**Figure S31.** The  $^1\text{H}$  NMR spectrum of **T-PDI**.



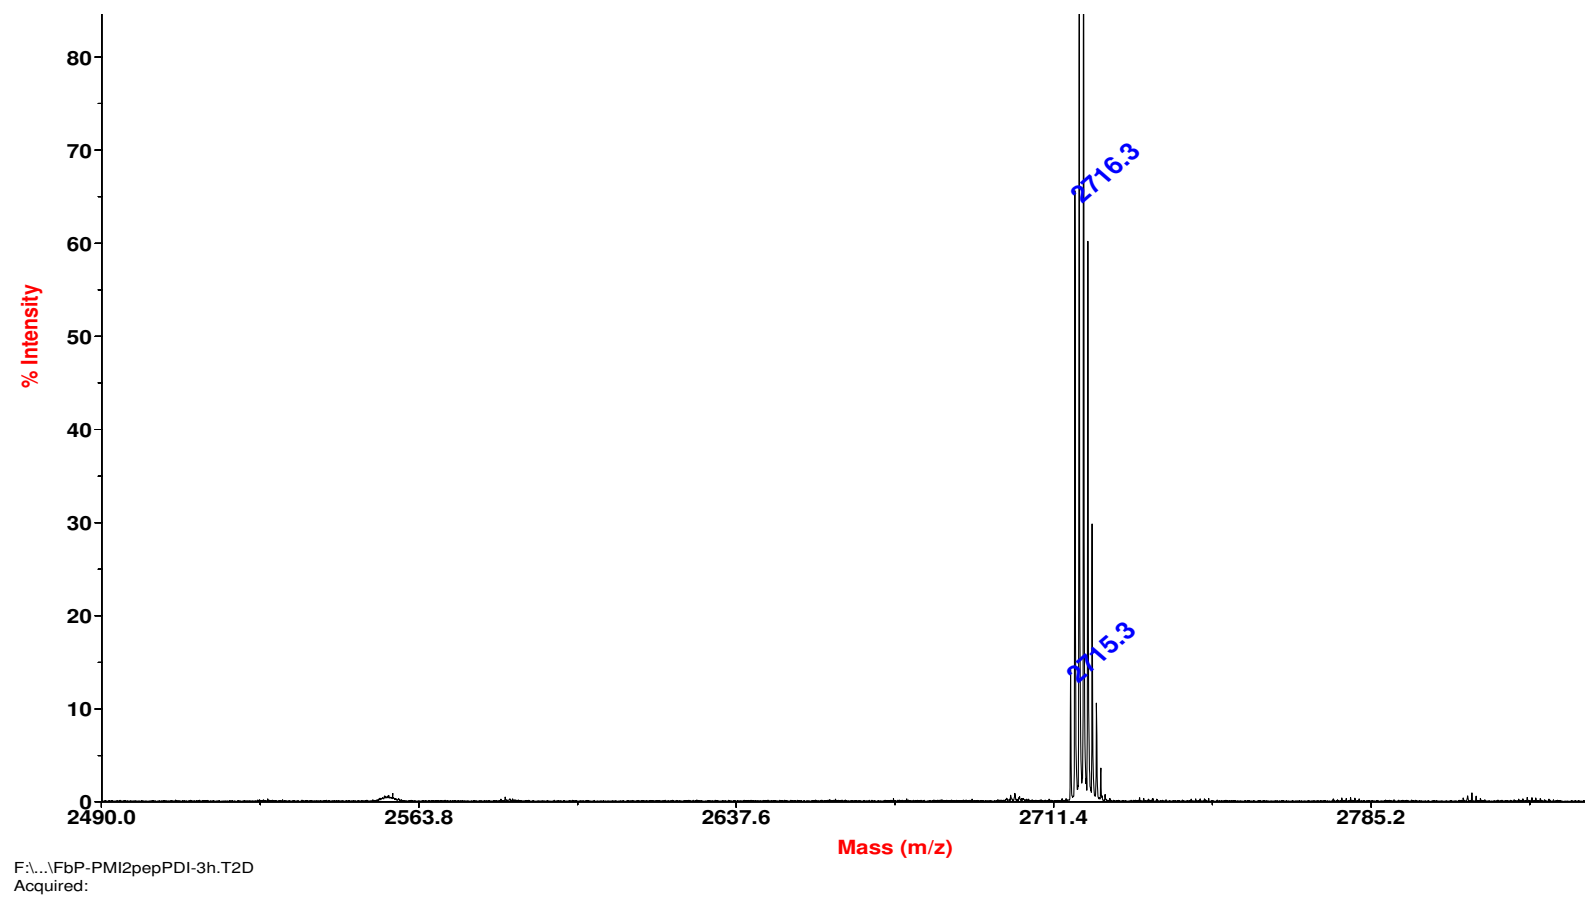

**Figure S32.** The MALDI-MS spectrum of **T-PDI**.

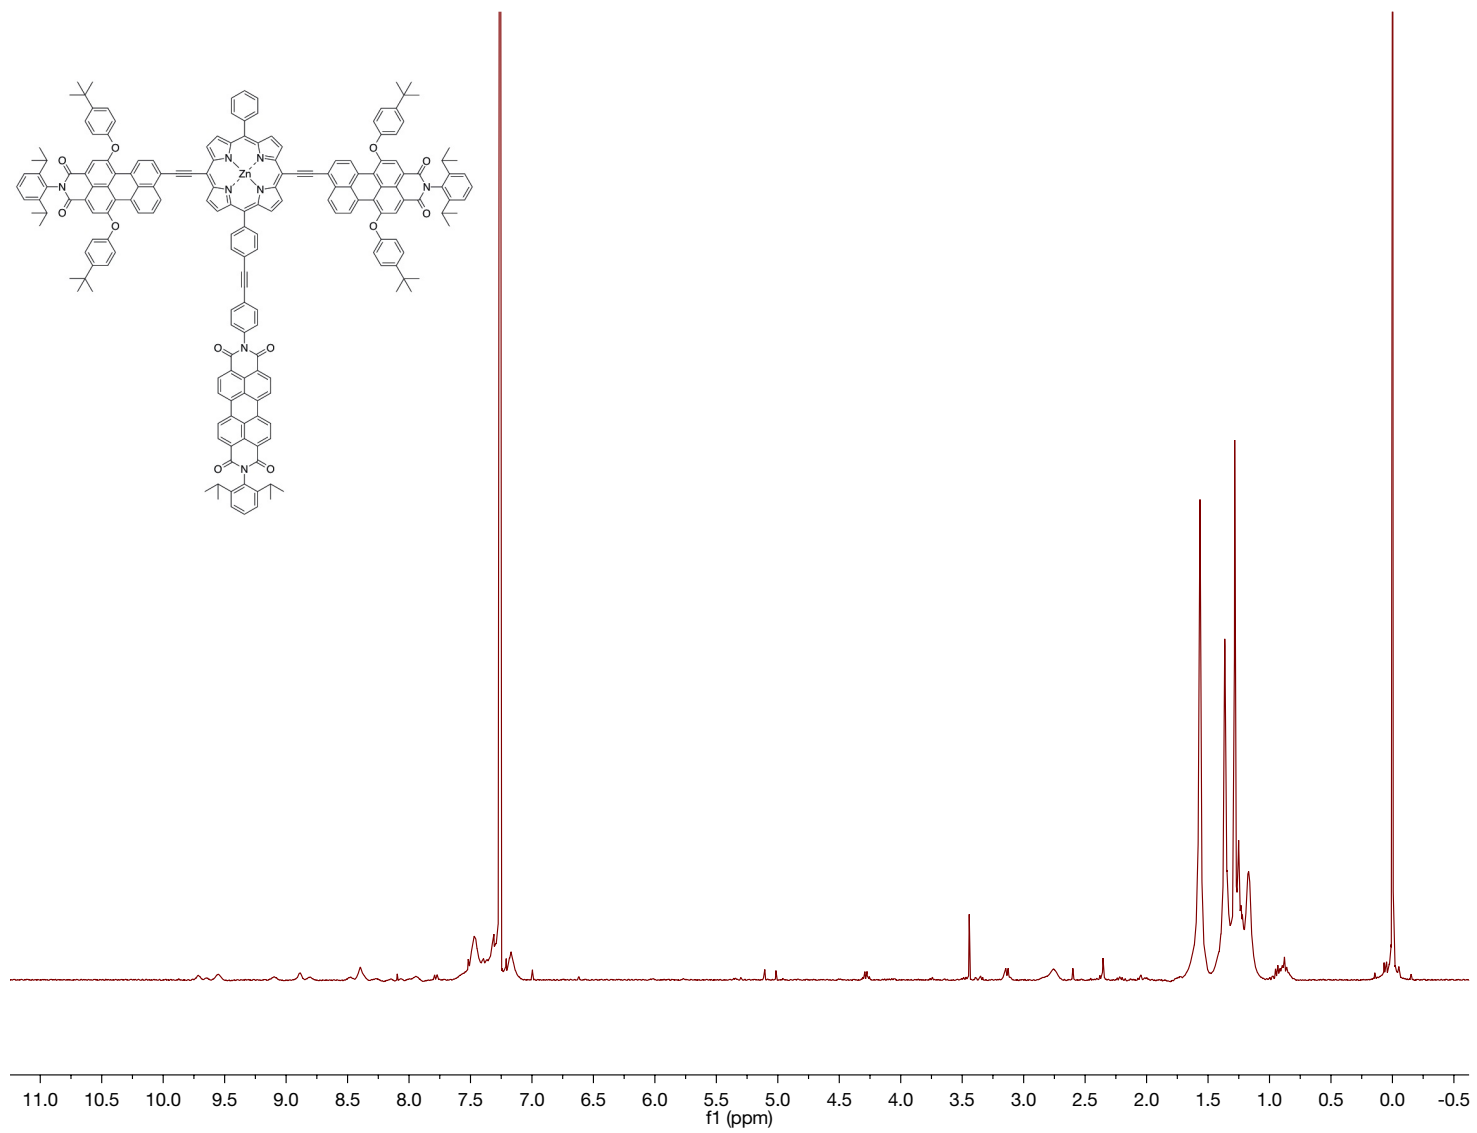

**Figure S33.** The <sup>1</sup>H NMR spectrum of **ZnT-PDI**.

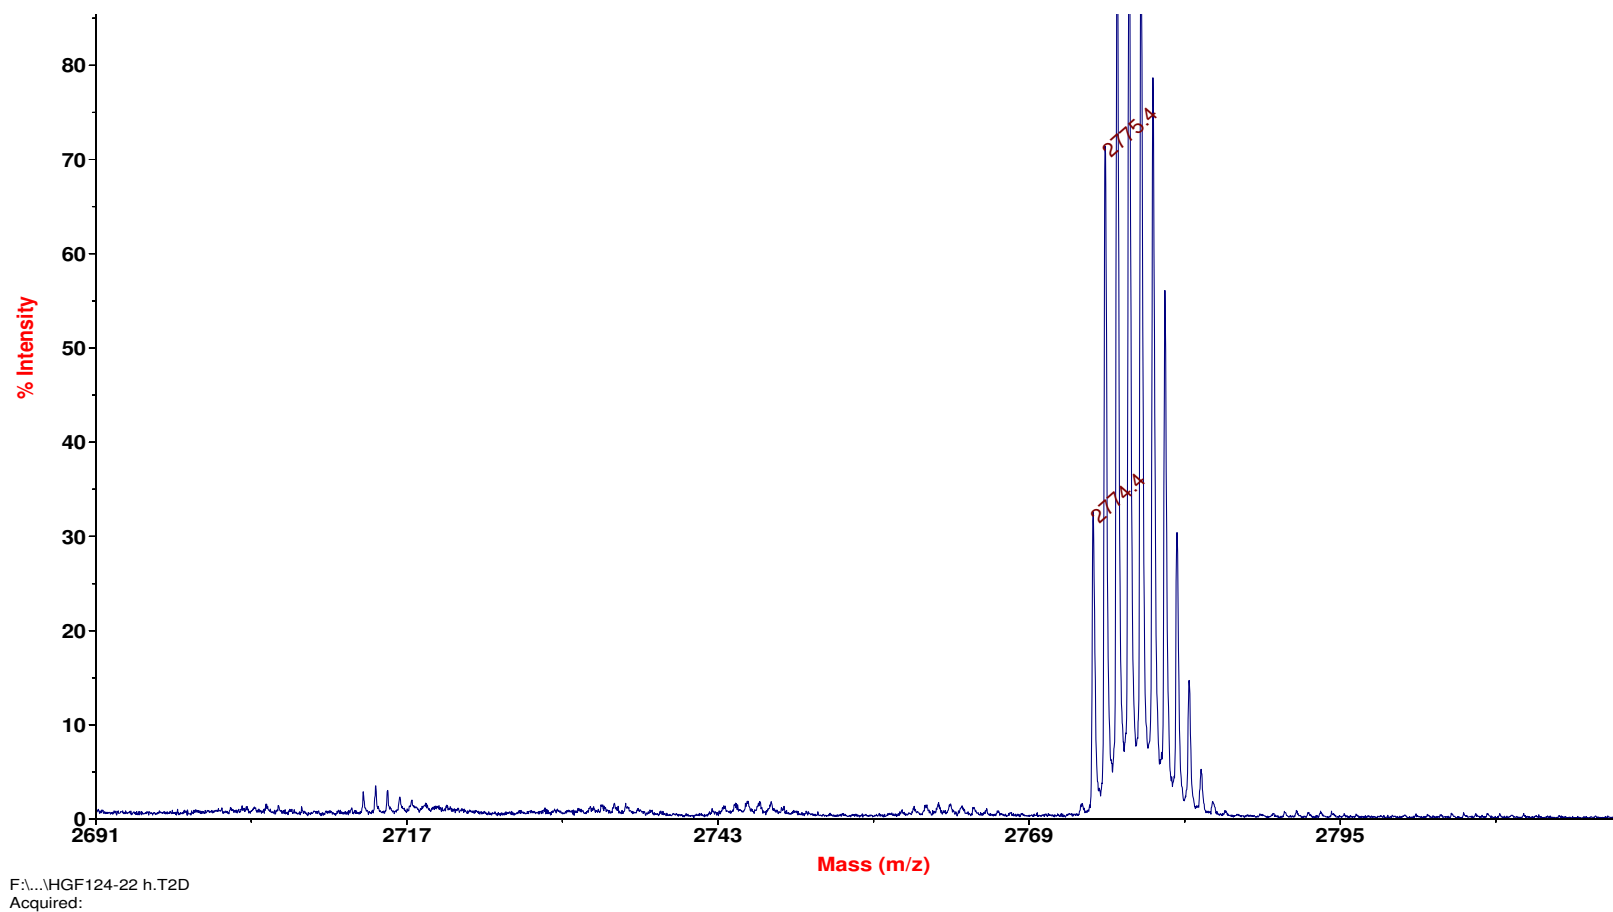

**Figure S34.** The MALDI-MS spectrum of **ZnT-PDI**.

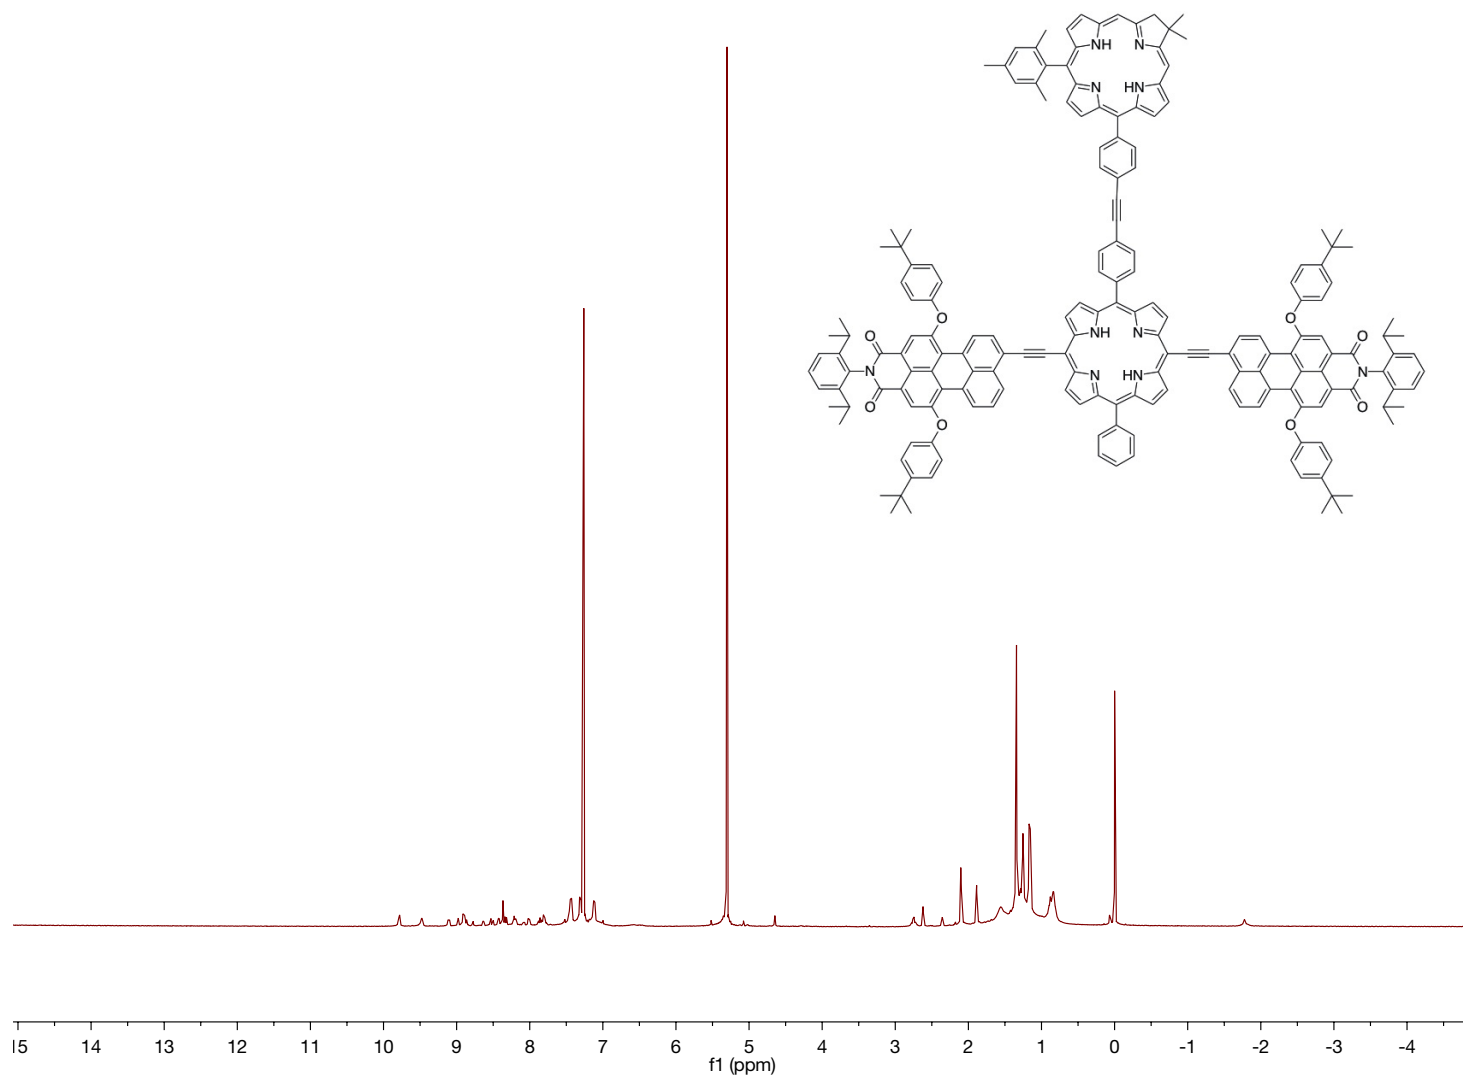

**Figure S35.** The <sup>1</sup>H NMR spectrum of C-T.

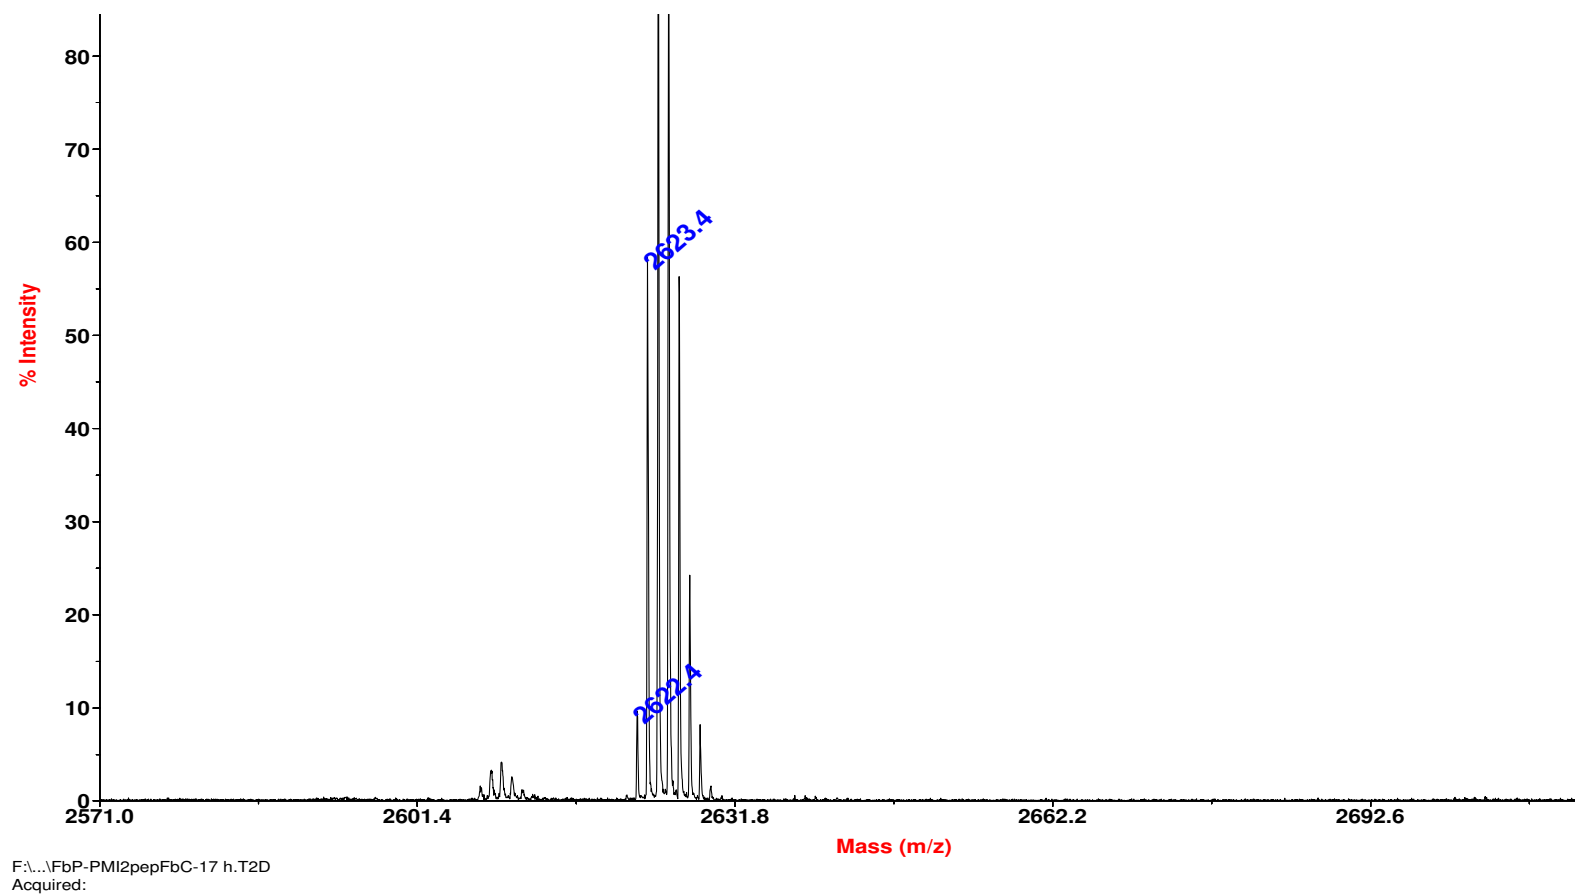

**Figure S36.** The MALDI-MS spectrum of **C-T**.

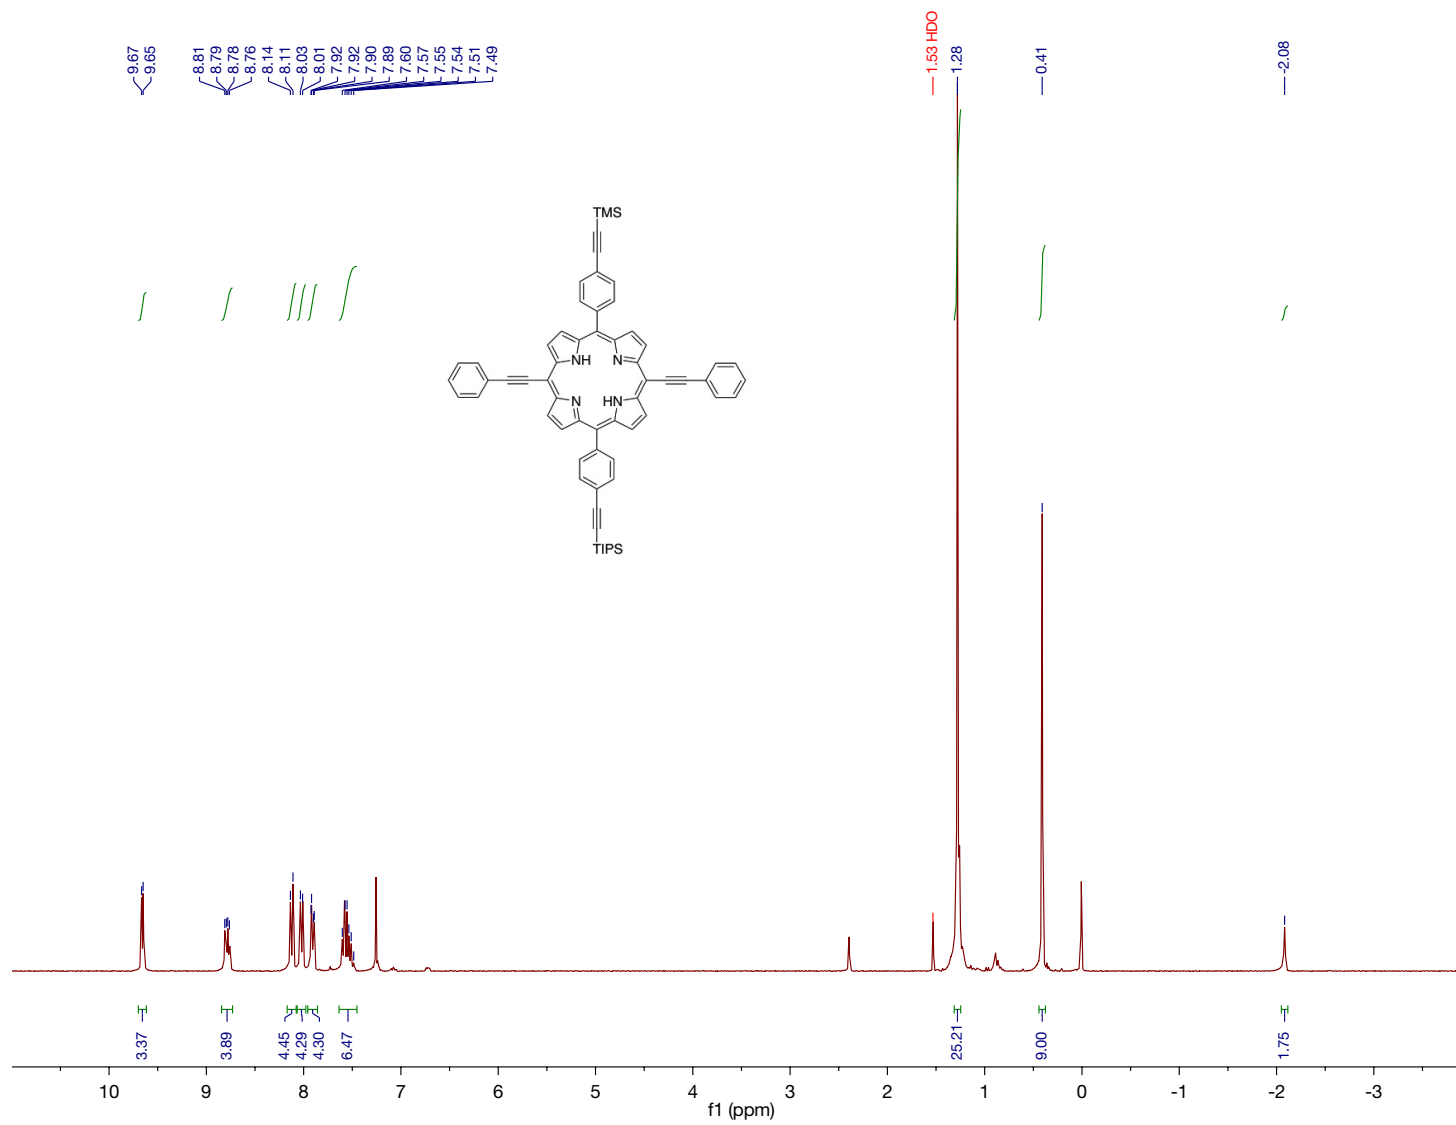

**Figure S37.** The  $^1\text{H}$  NMR spectrum of **P-TMS/TIPS**.

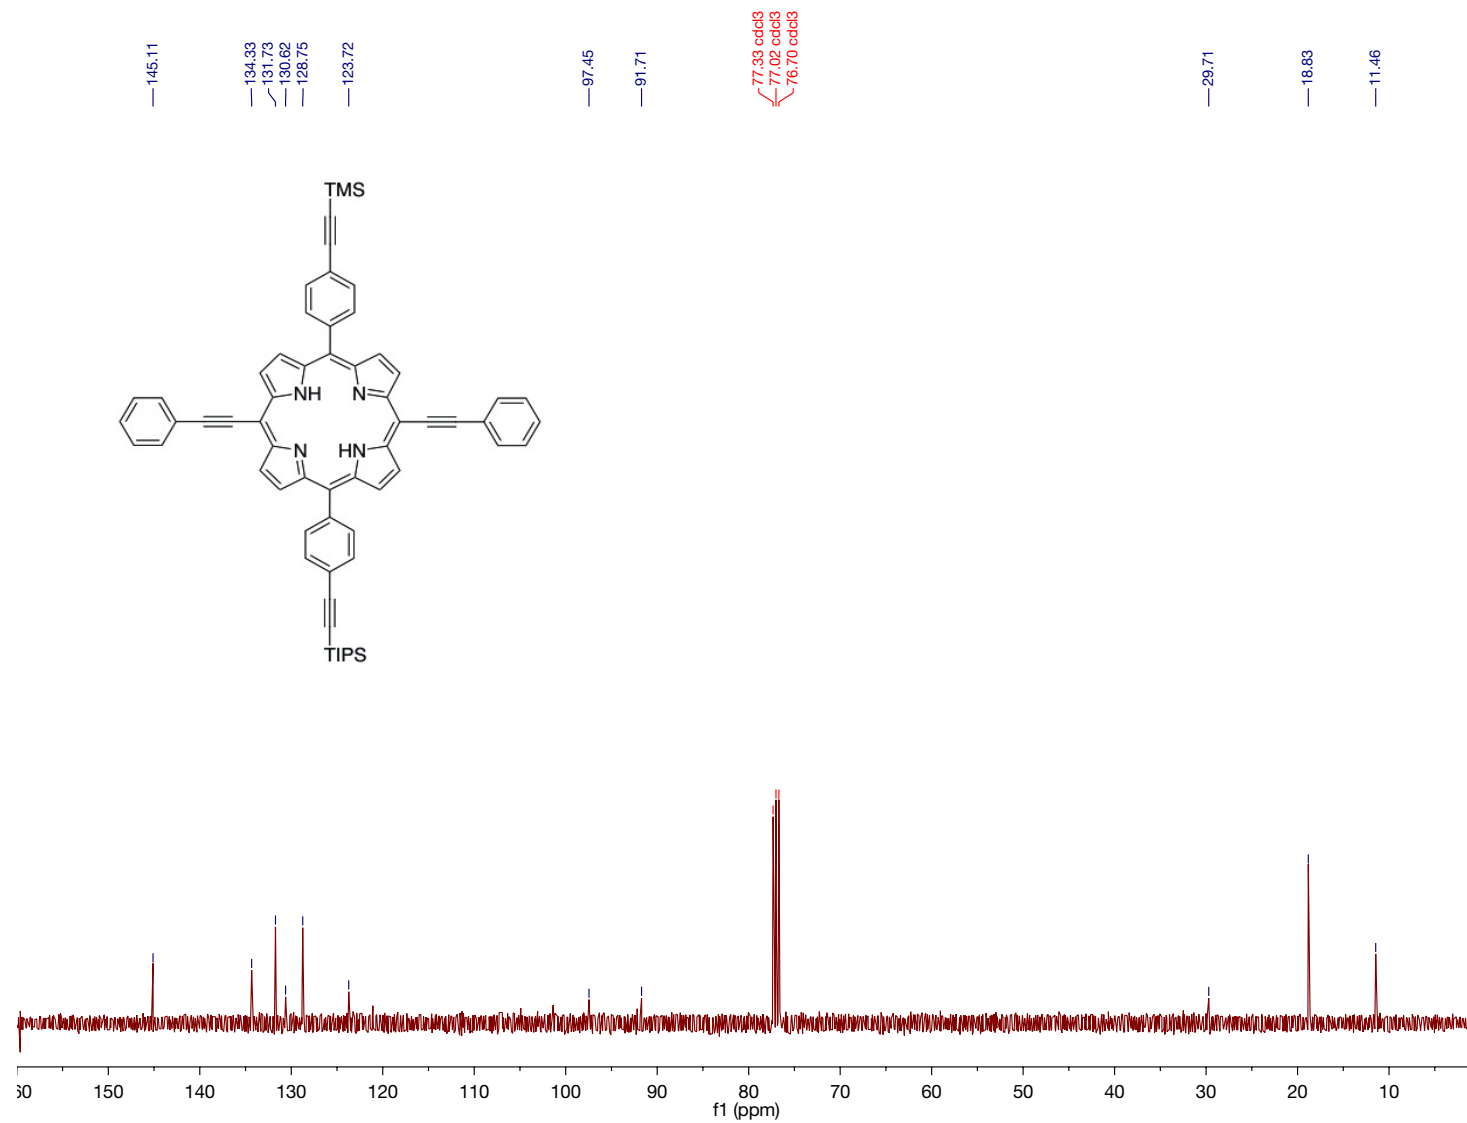

Figure S38. The  $^{13}\text{C}$  NMR spectrum of P-TMS/TIPS.

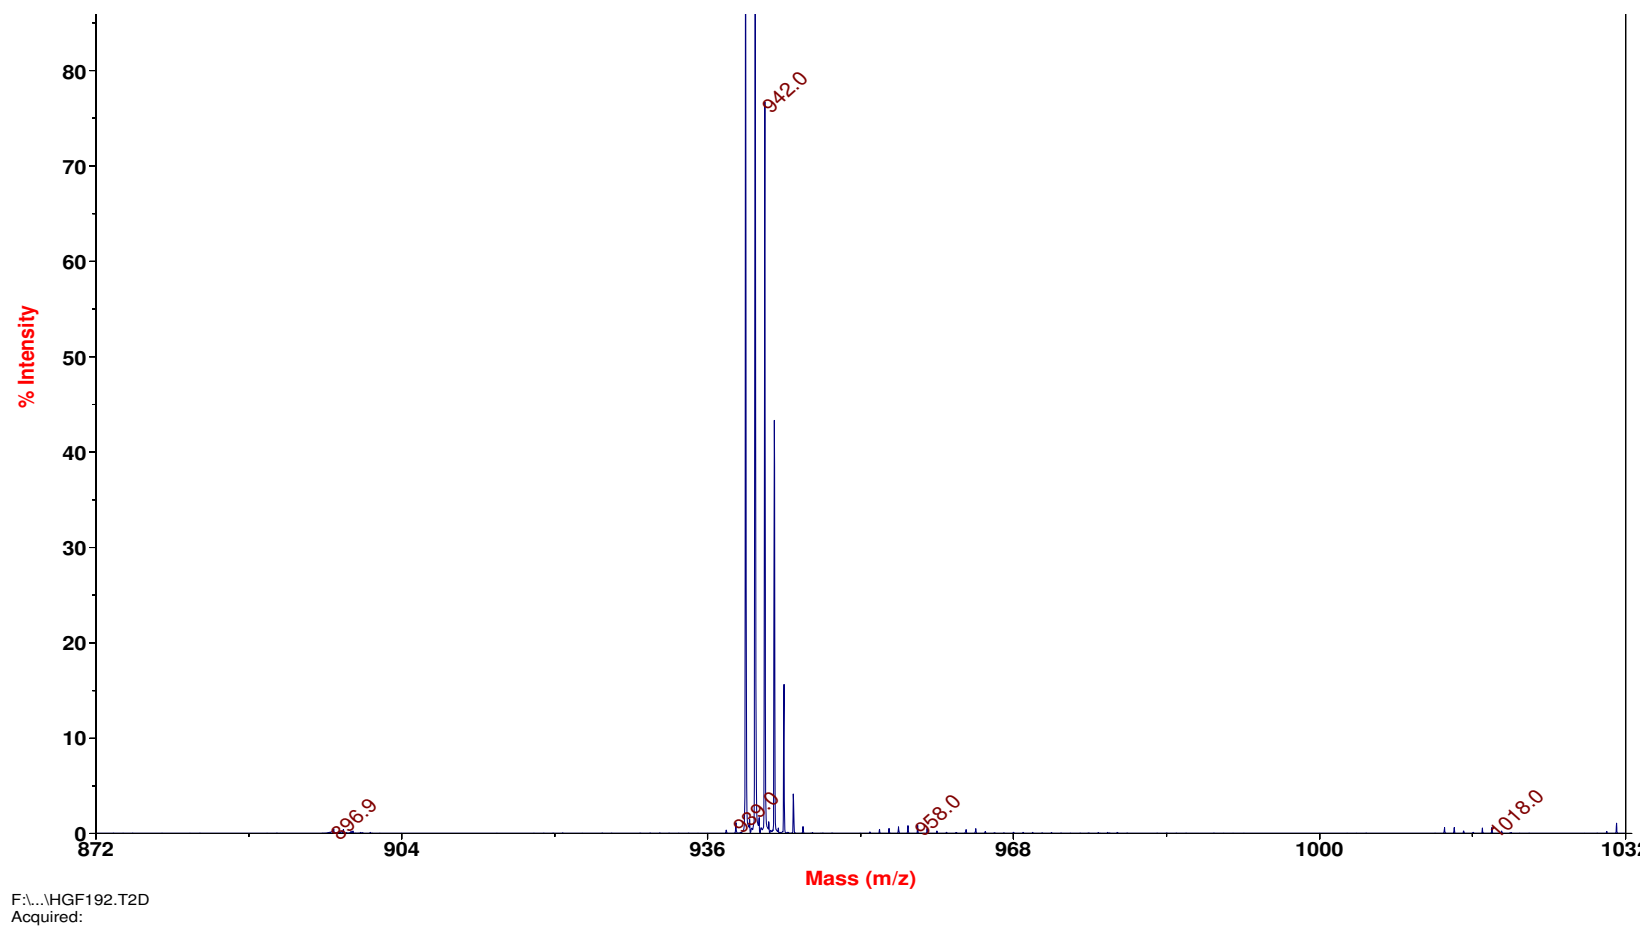

**Figure S39.** The MALDI-MS spectrum of **P-TMS/TIPS**.



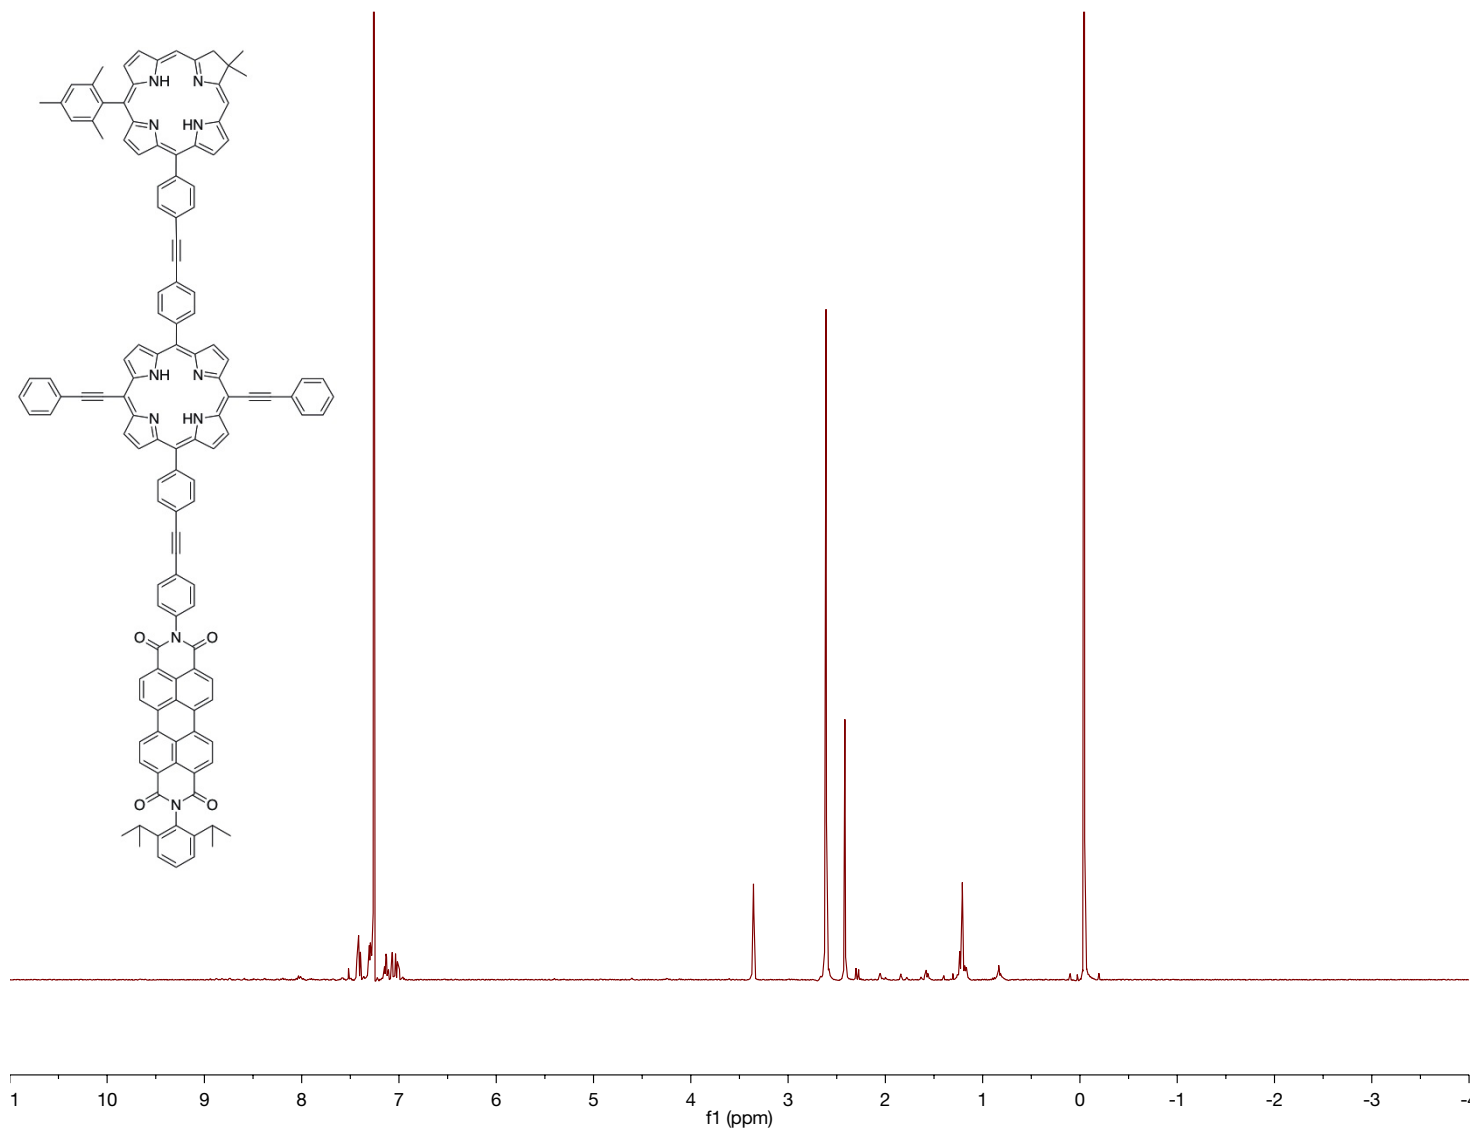

**Figure S40.** The <sup>1</sup>H NMR spectrum of **C-P-PDI**.

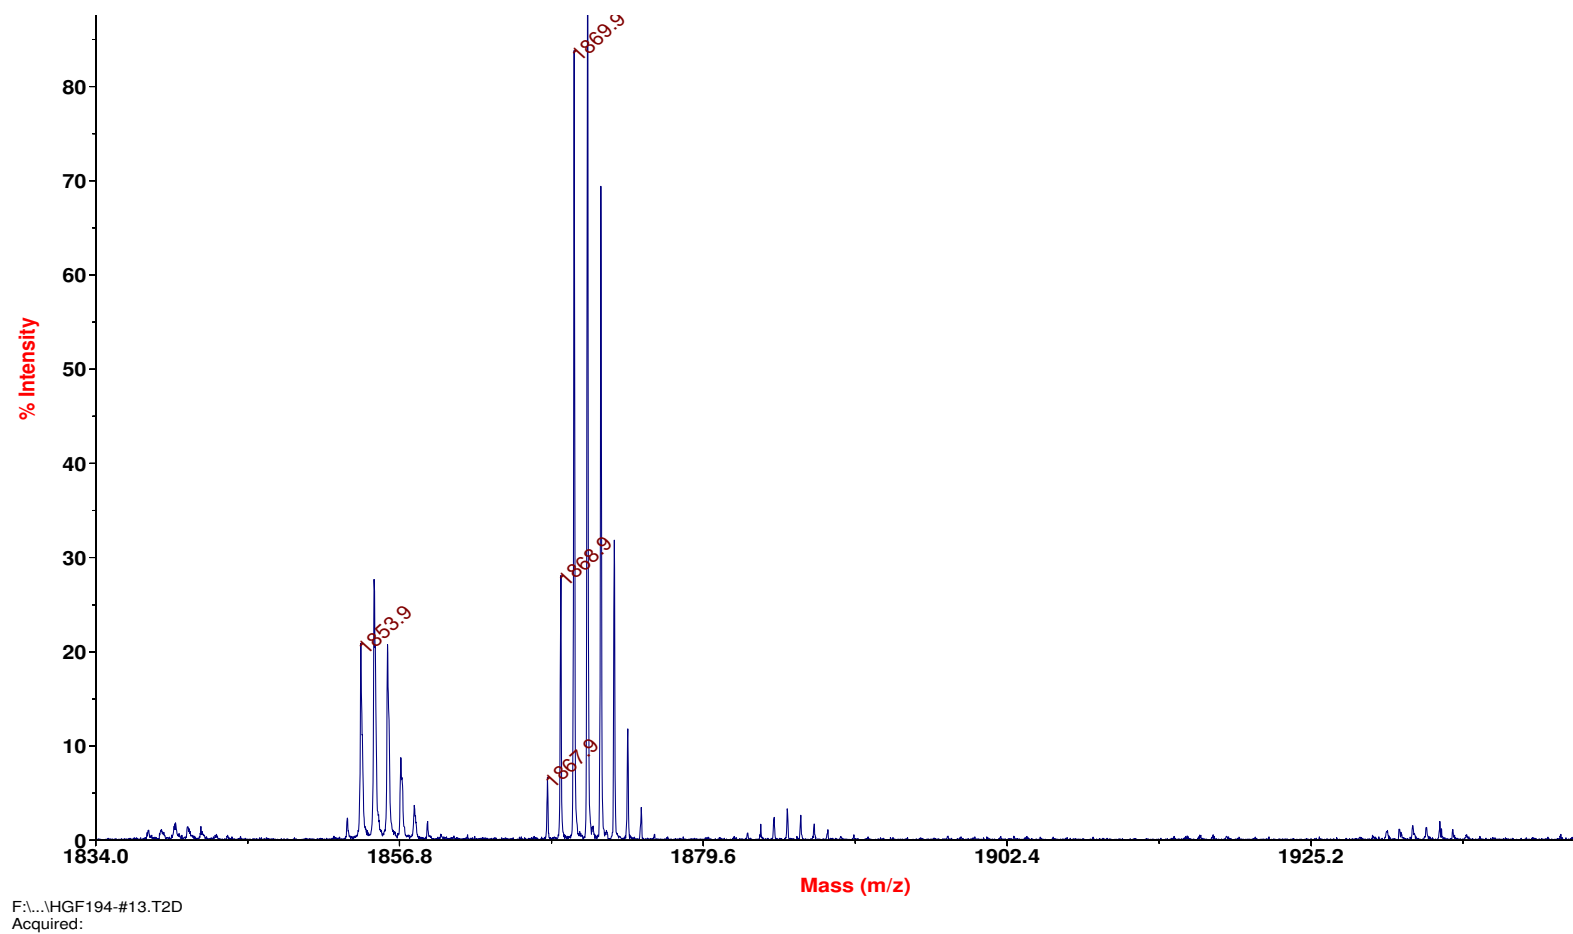

**Figure S41.** The MALDI-MS spectrum of **C-P-PDI**.



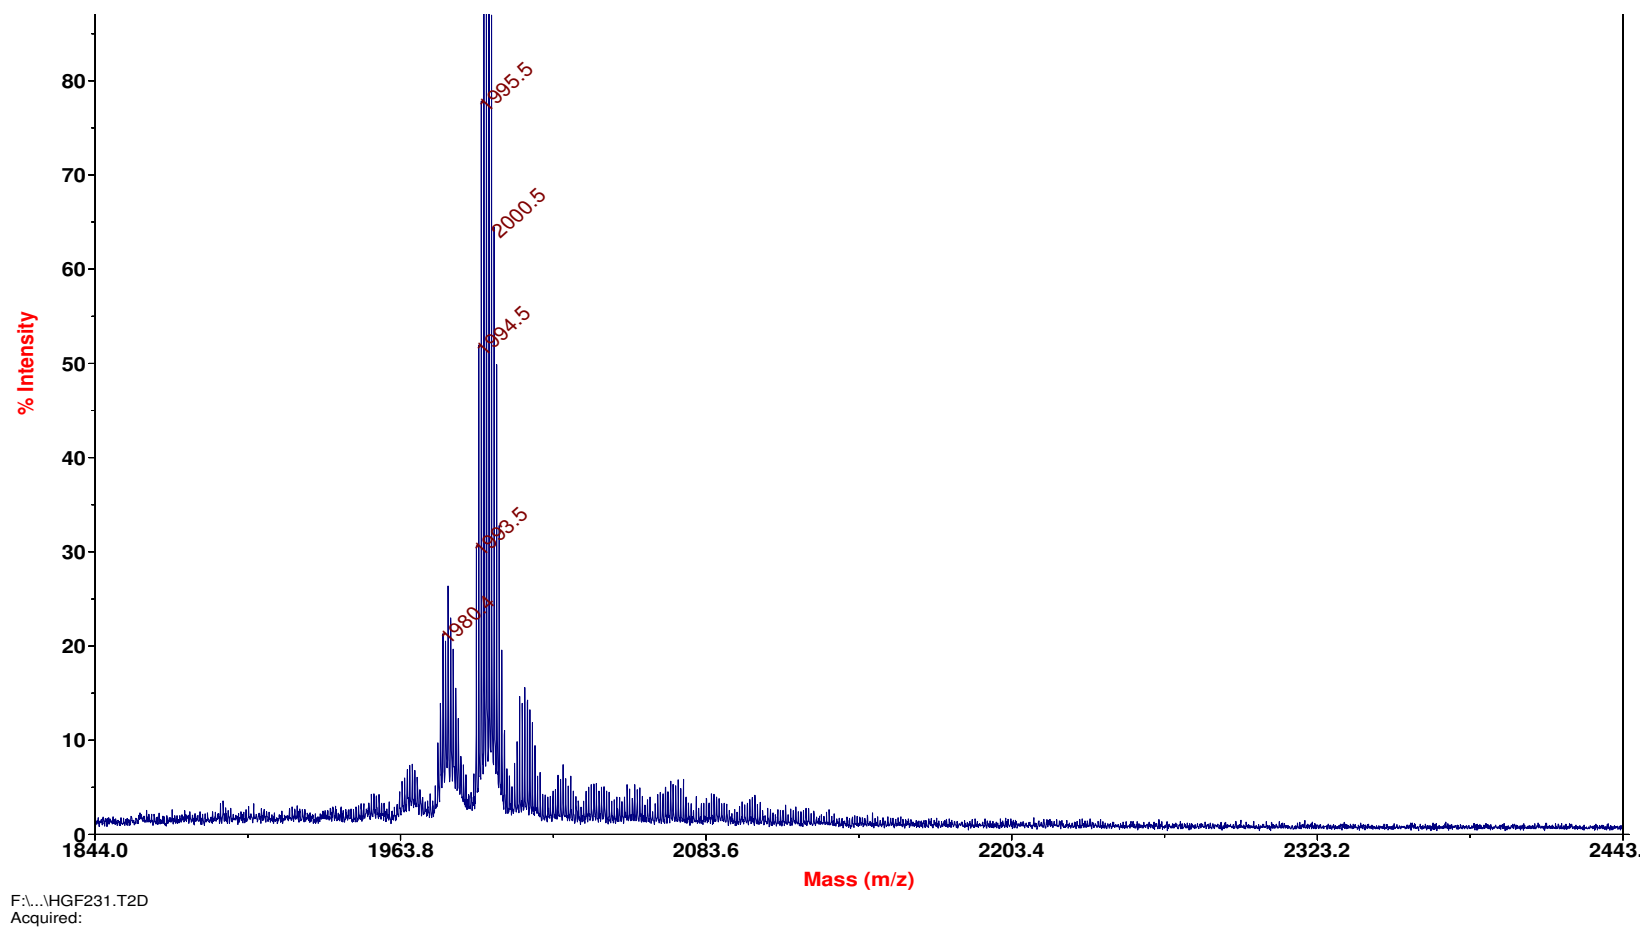

**Figure S43.** The MALDI-MS spectrum of **ZnC-ZnP-PDI**.

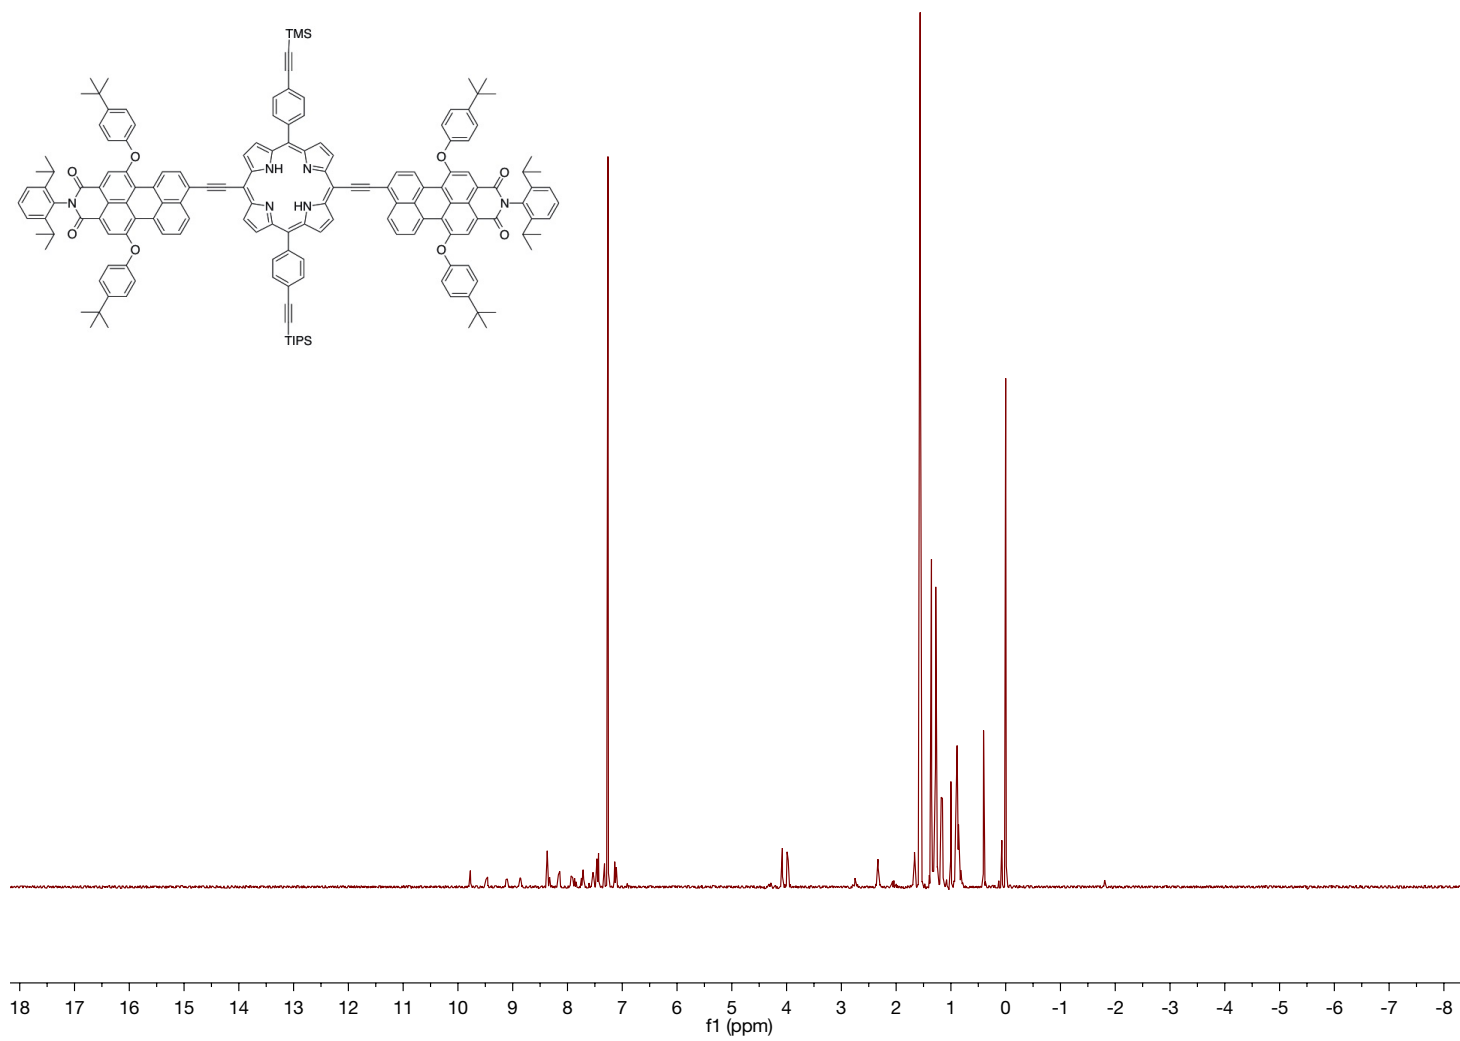

**Figure S44.** The <sup>1</sup>H NMR spectrum of T-TMS/TIPS.

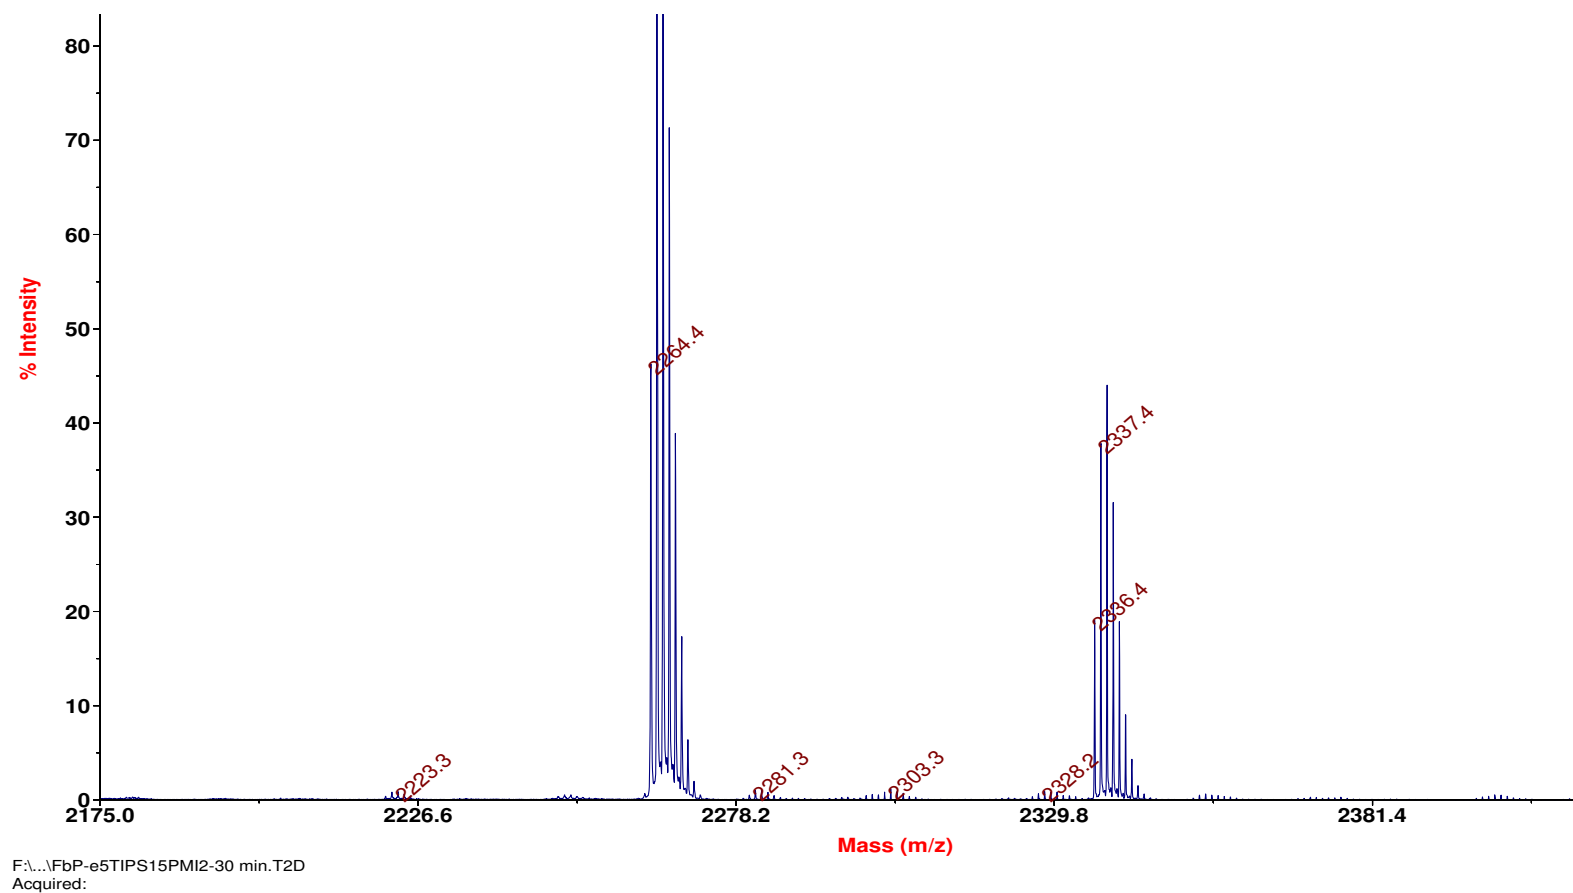

**Figure S45.** The MALDI-MS spectrum of T-TMS/TIPS.

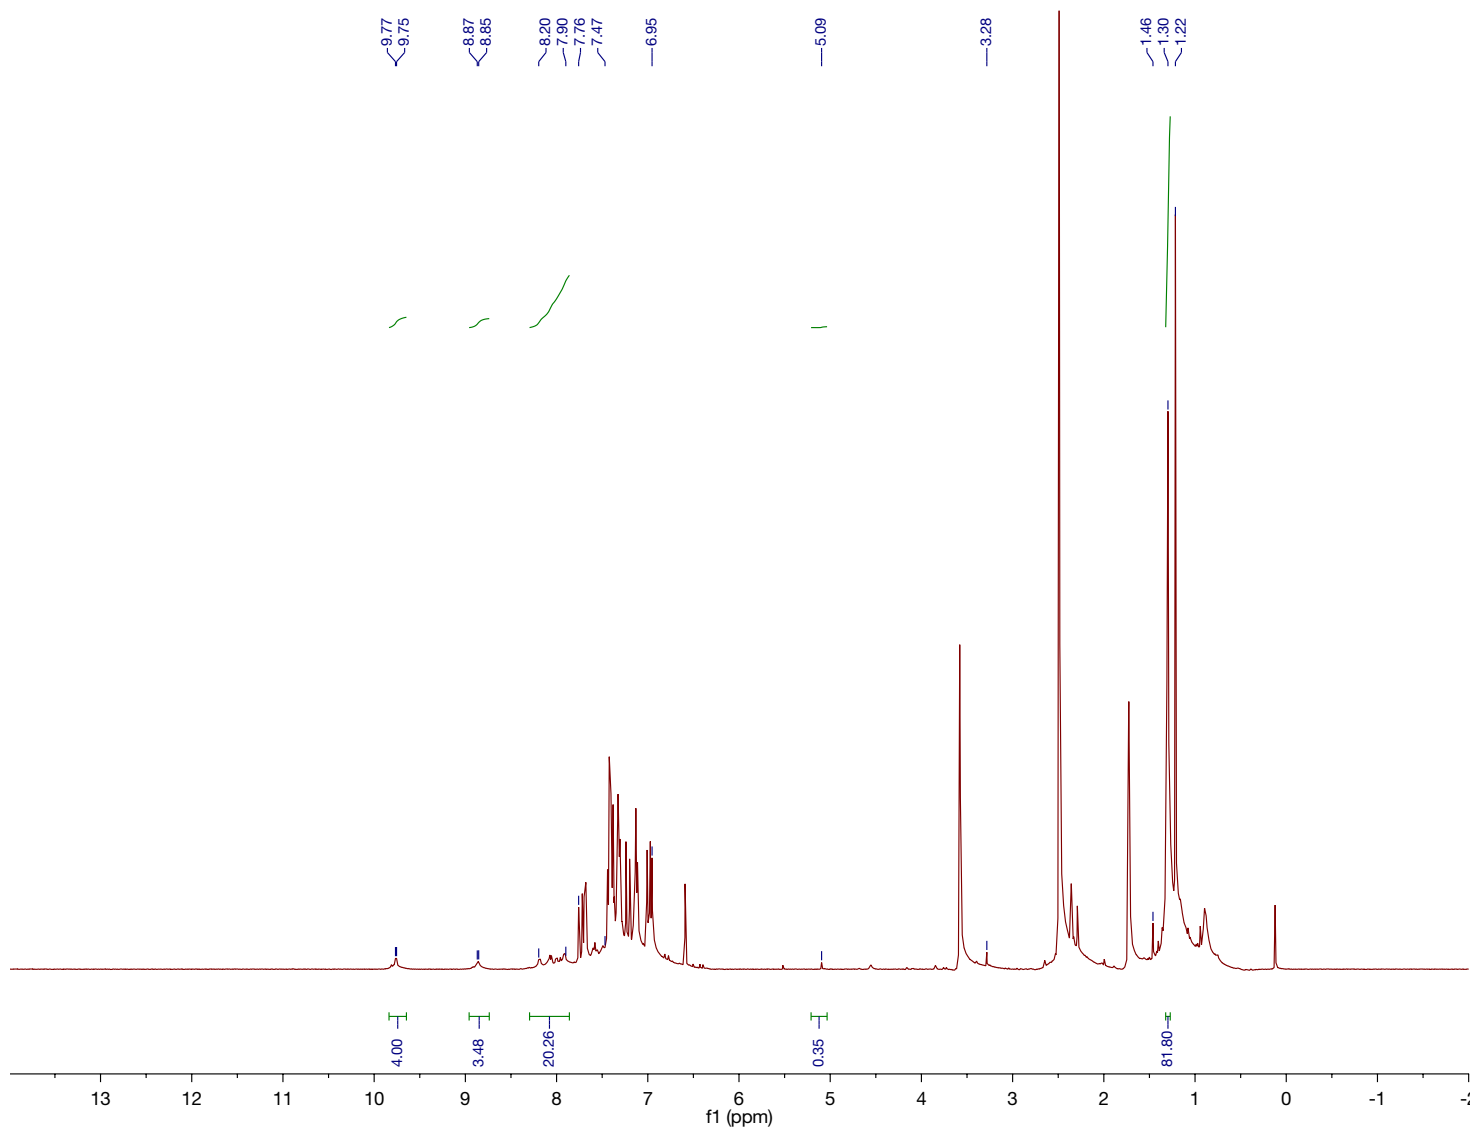

**Figure S46.** The  $^1\text{H}$  NMR spectrum of ZnP-H/TIPS.

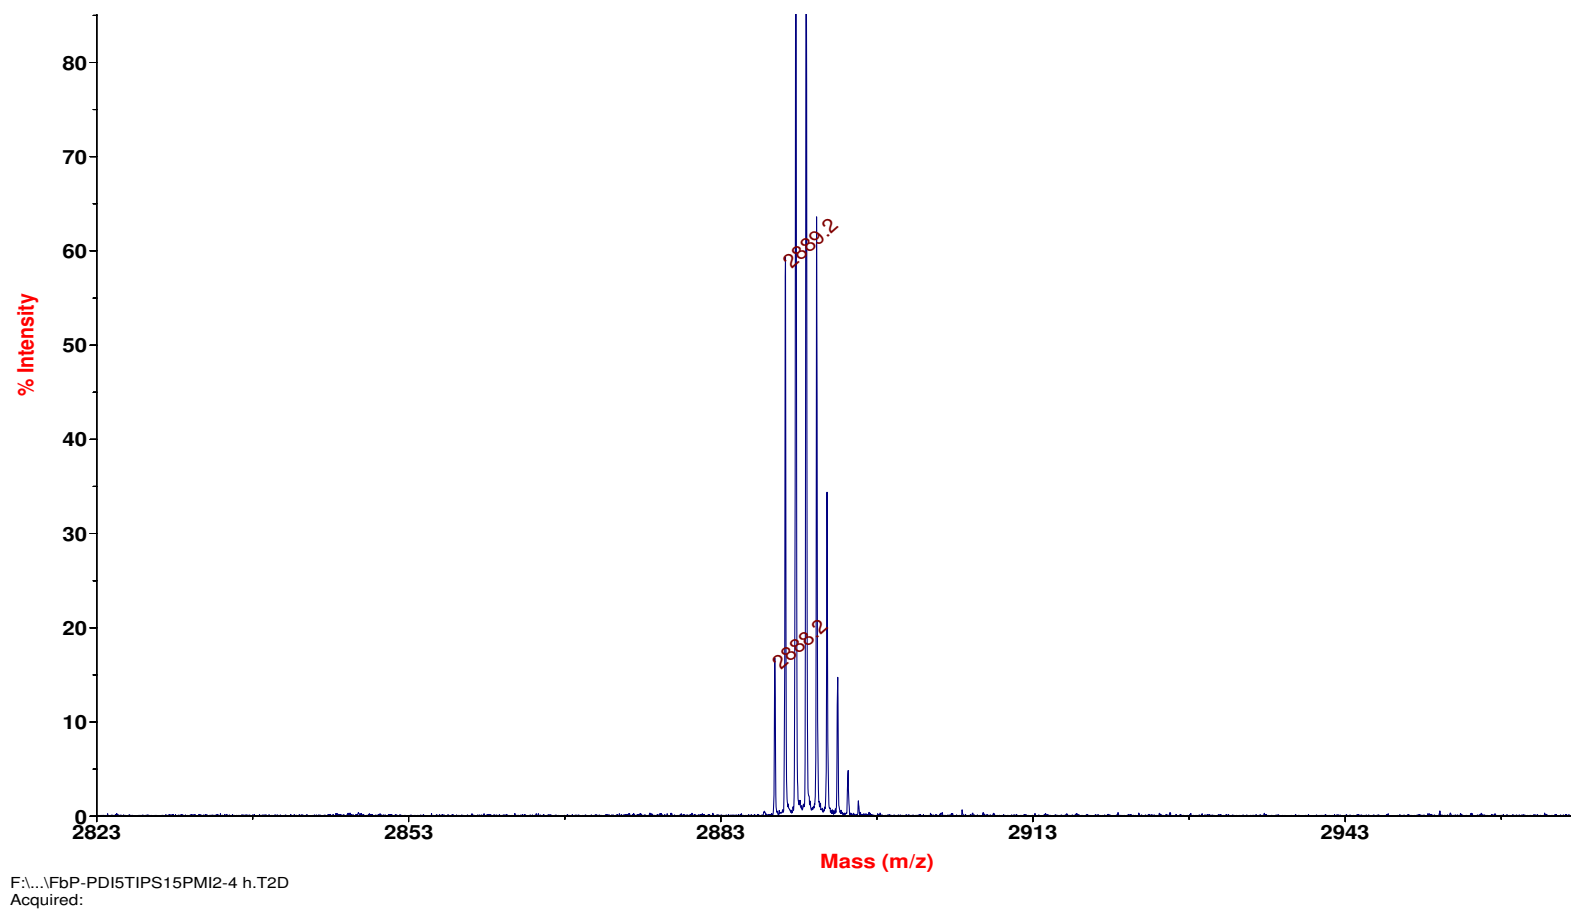

**Figure S47.** The MALDI-MS spectrum of **T-H/PDI**.



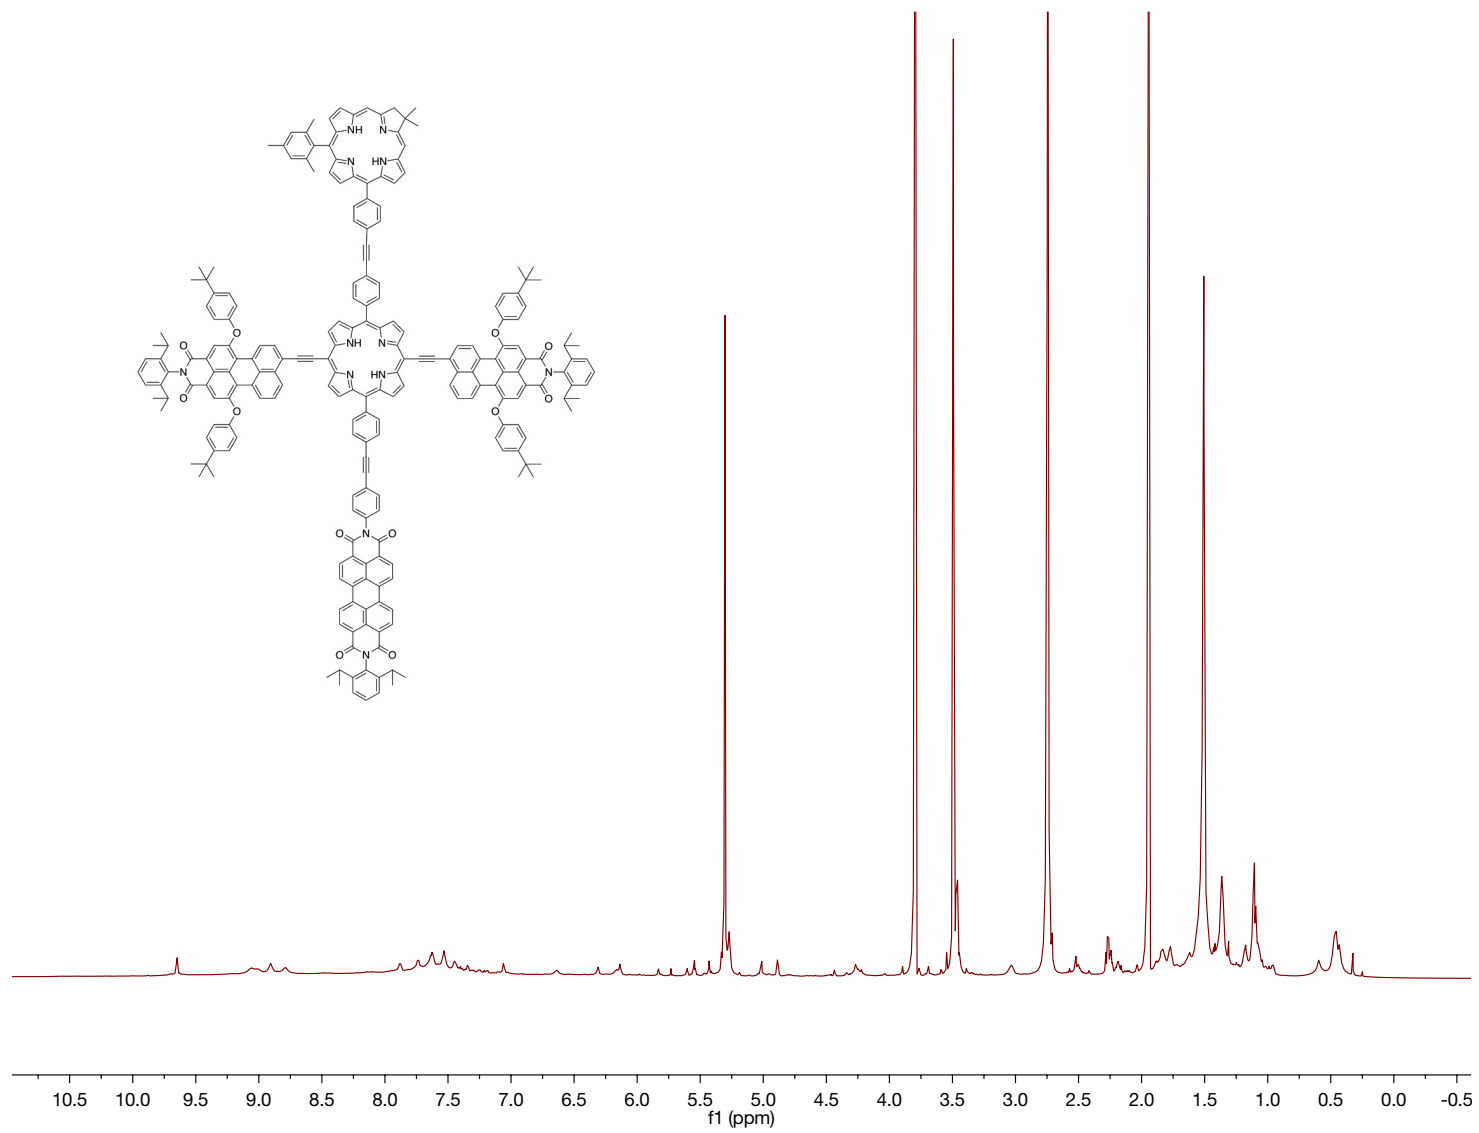

**Figure S48.** The <sup>1</sup>H NMR spectrum of **C-T-PDI**.

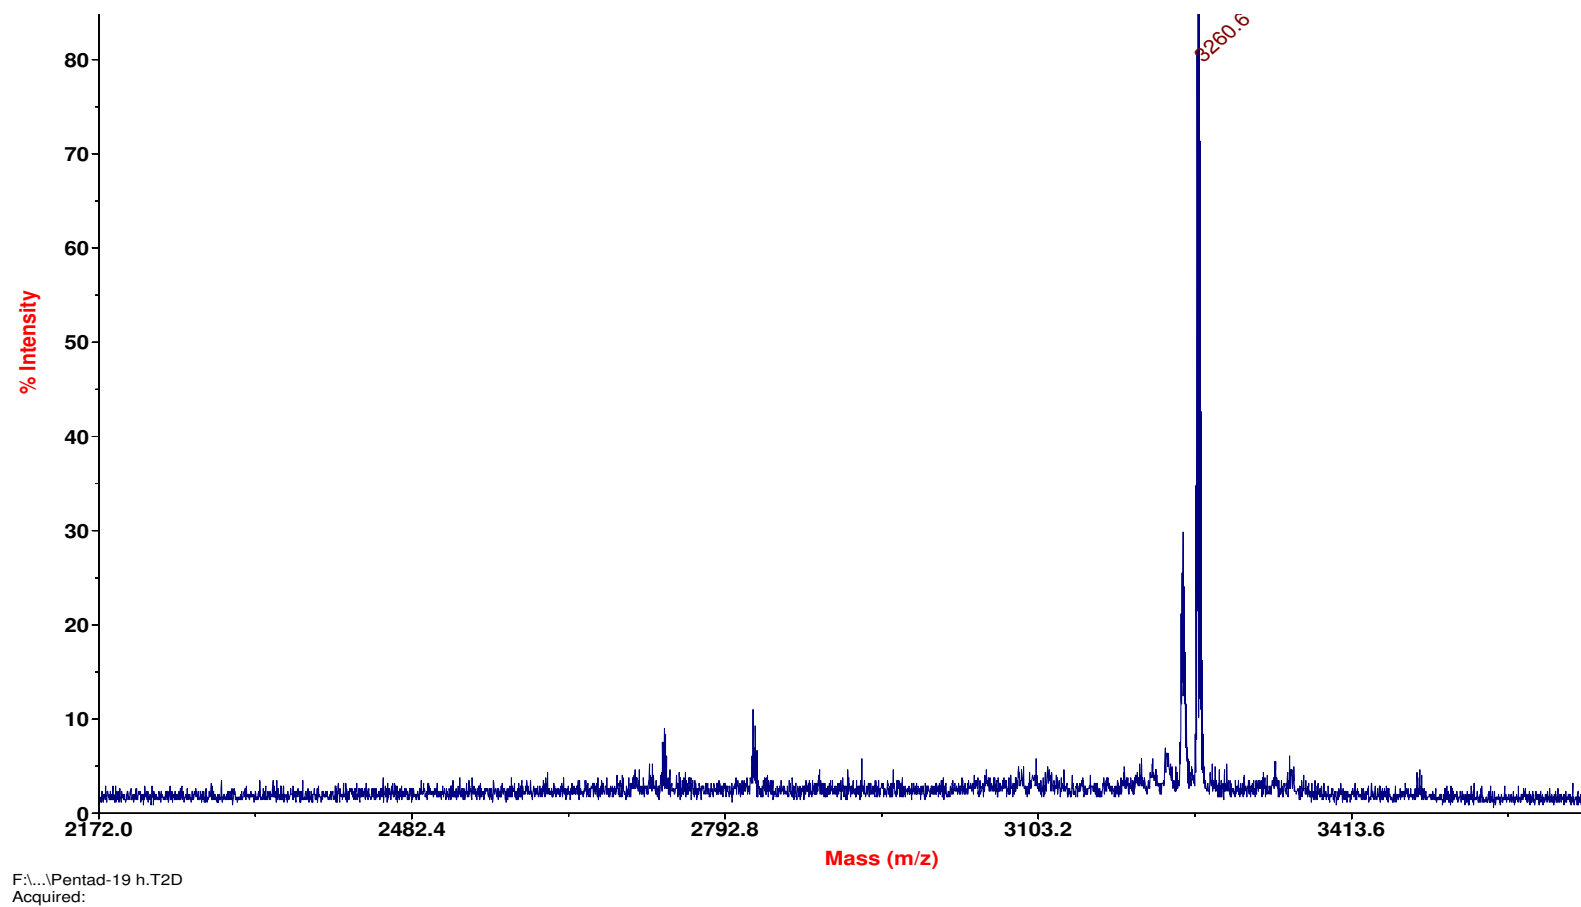

**Figure S49.** The MALDI-MS spectrum of **C-T-PDI**.

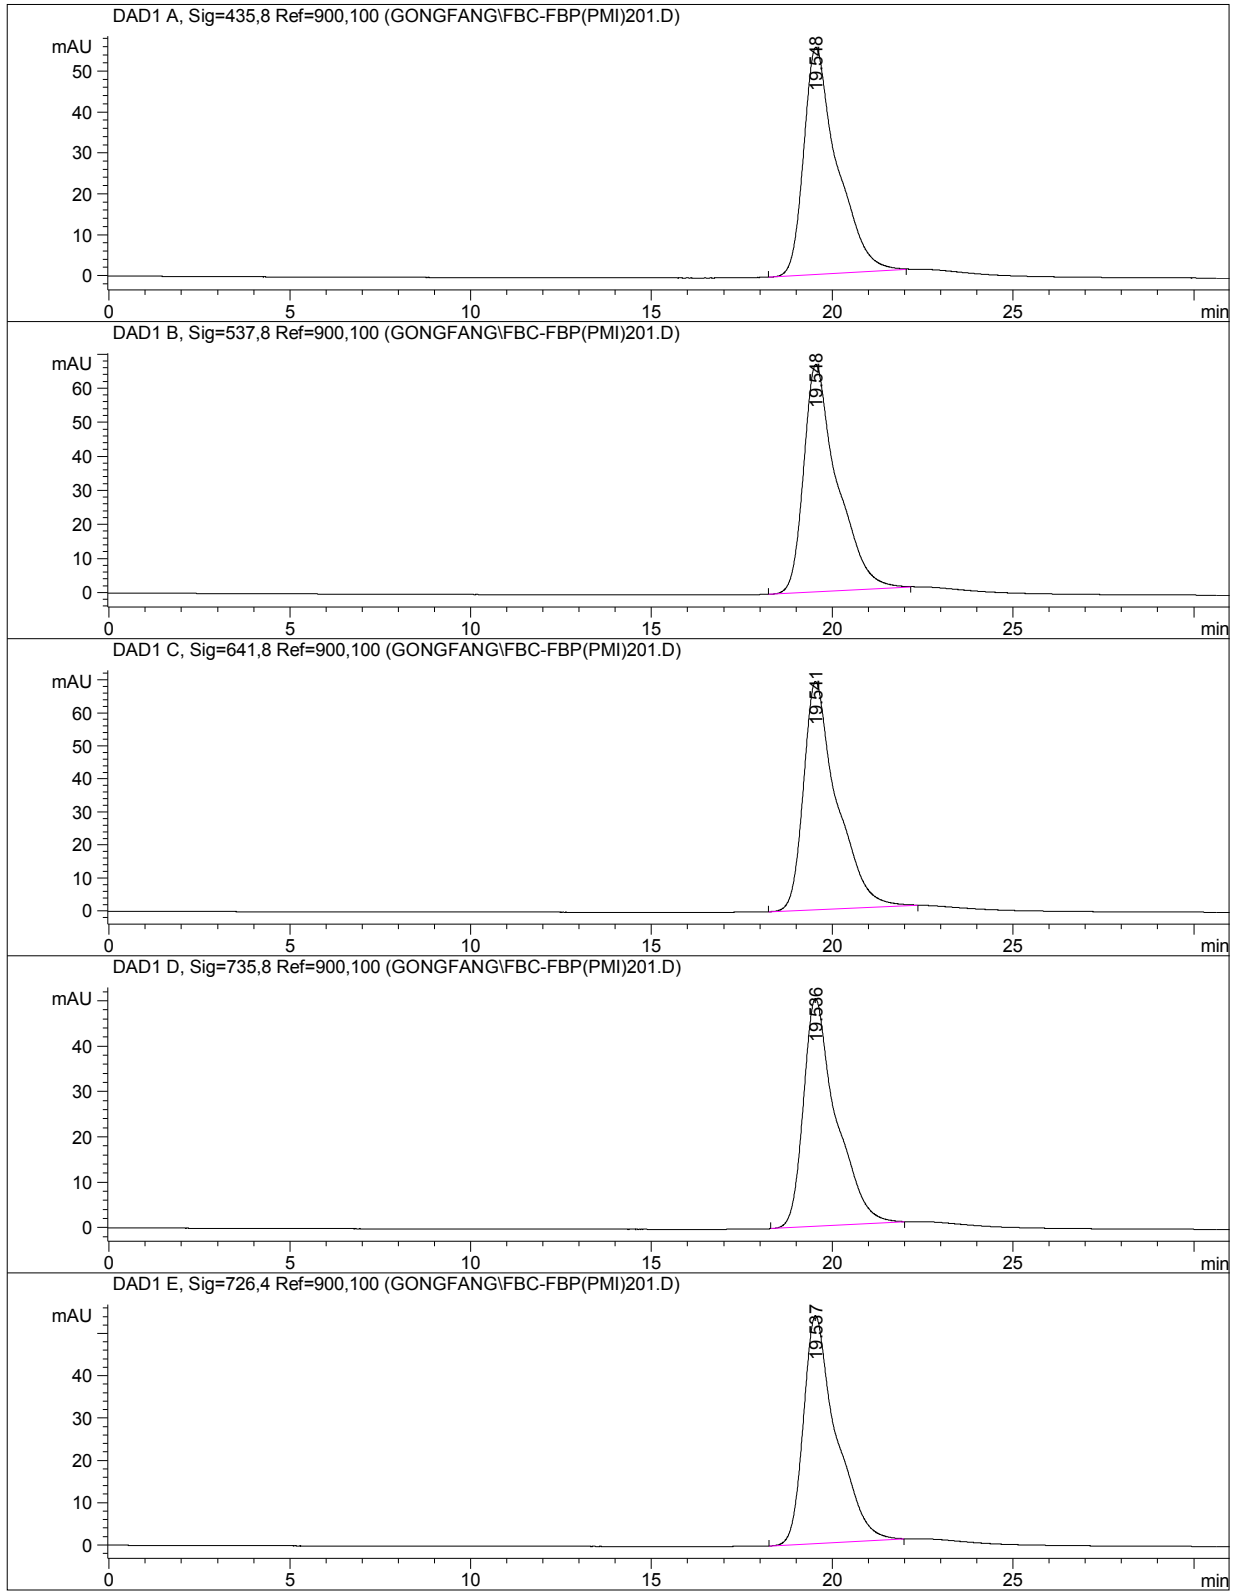

**Figure S50.** The HPLC trace of C-T.

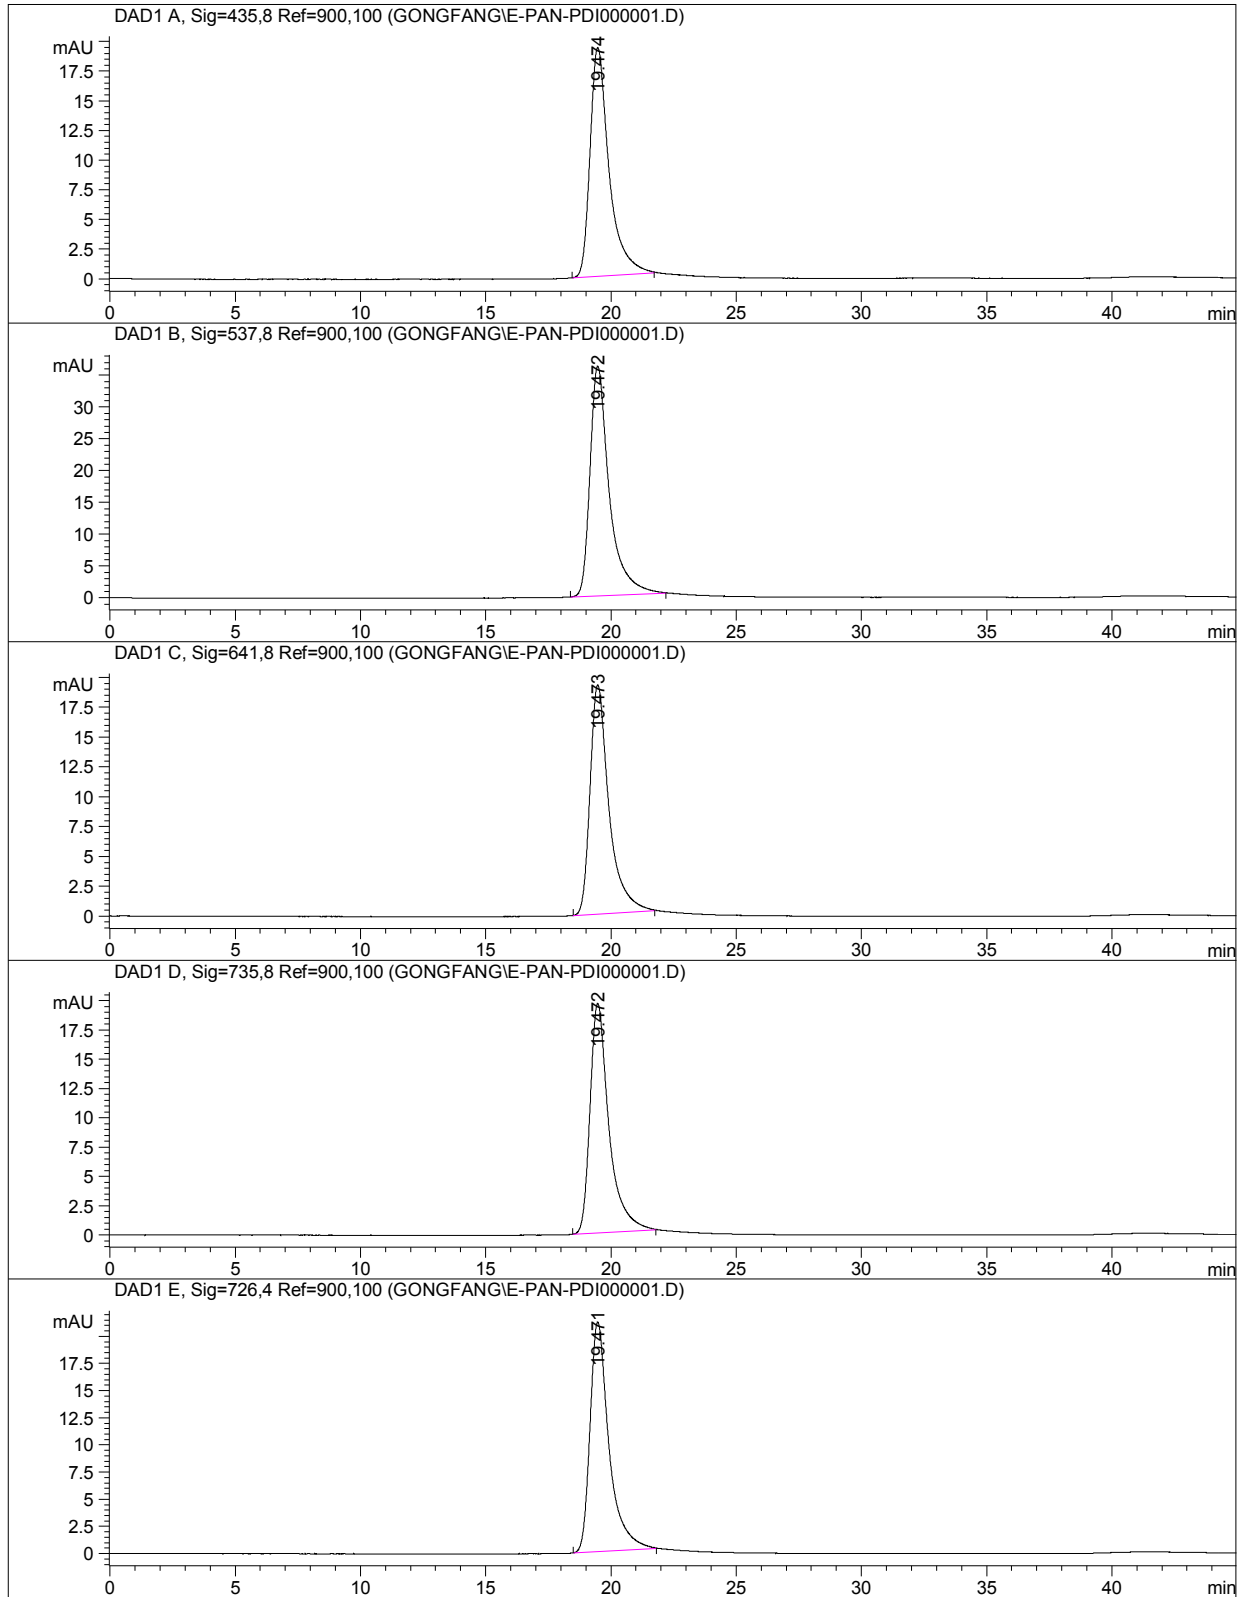

**Figure S51.** The HPLC trace of T-H/PDI

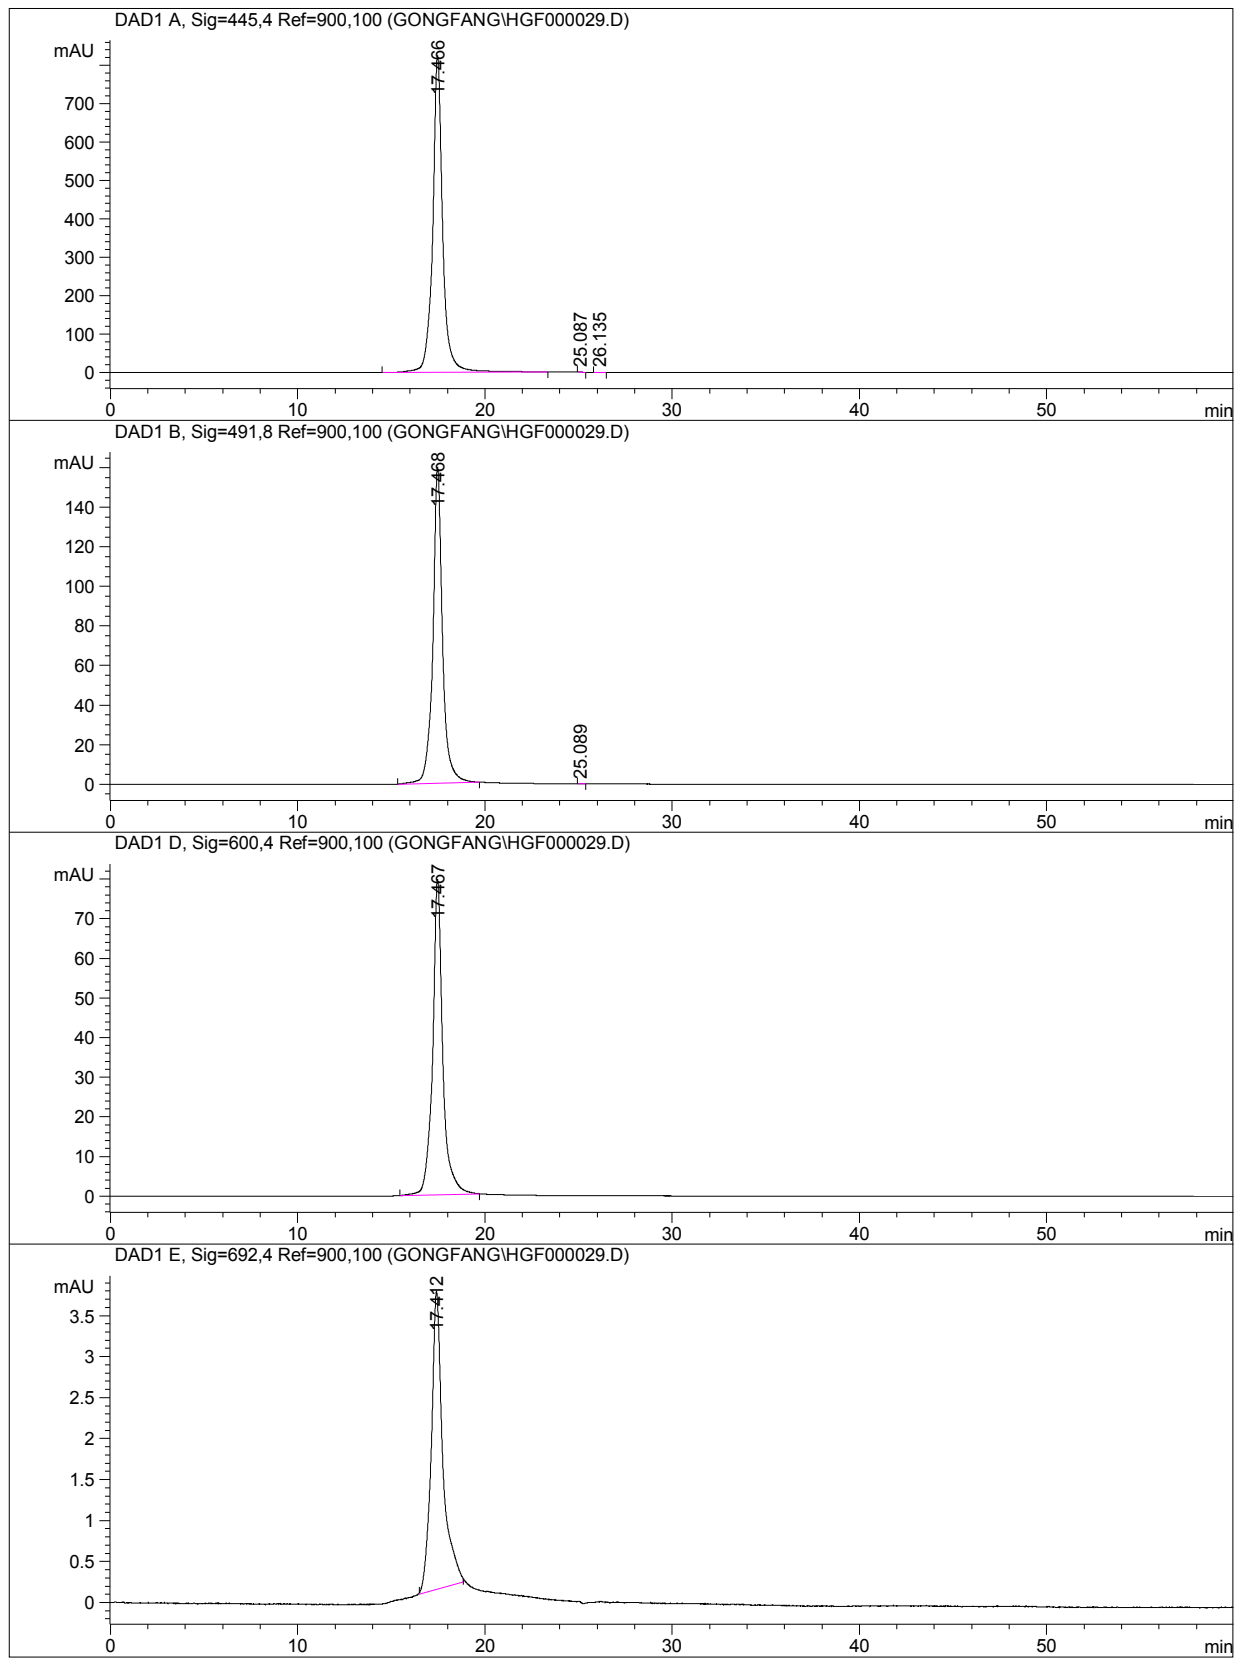

**Figure S52.** The HPLC trace of ZnC-ZnP-PDI.

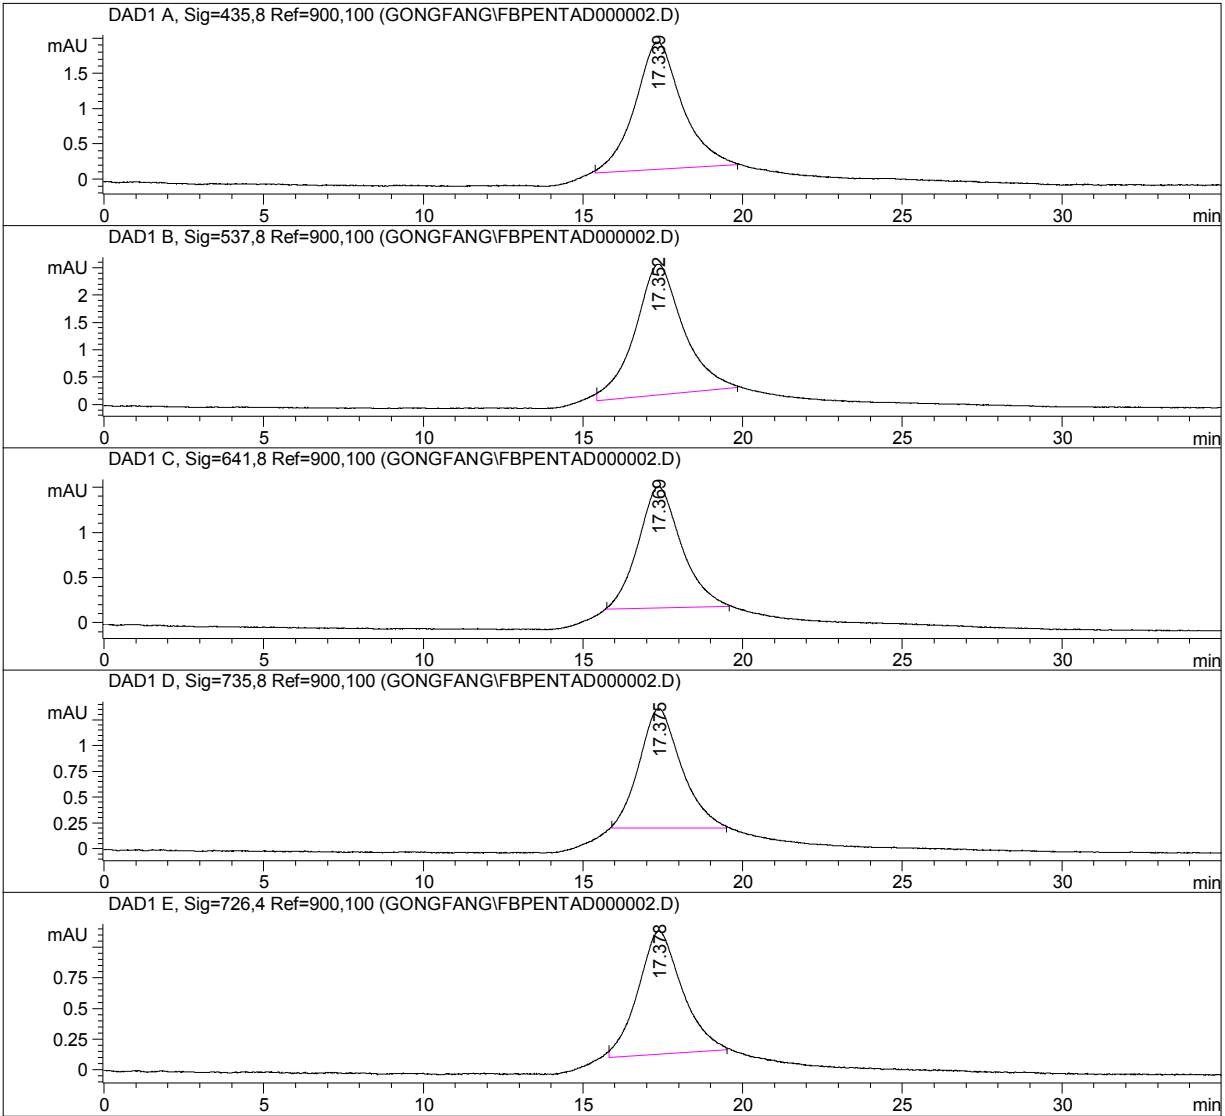

**Figure S53.** The HPLC trace of C-T-PDI.

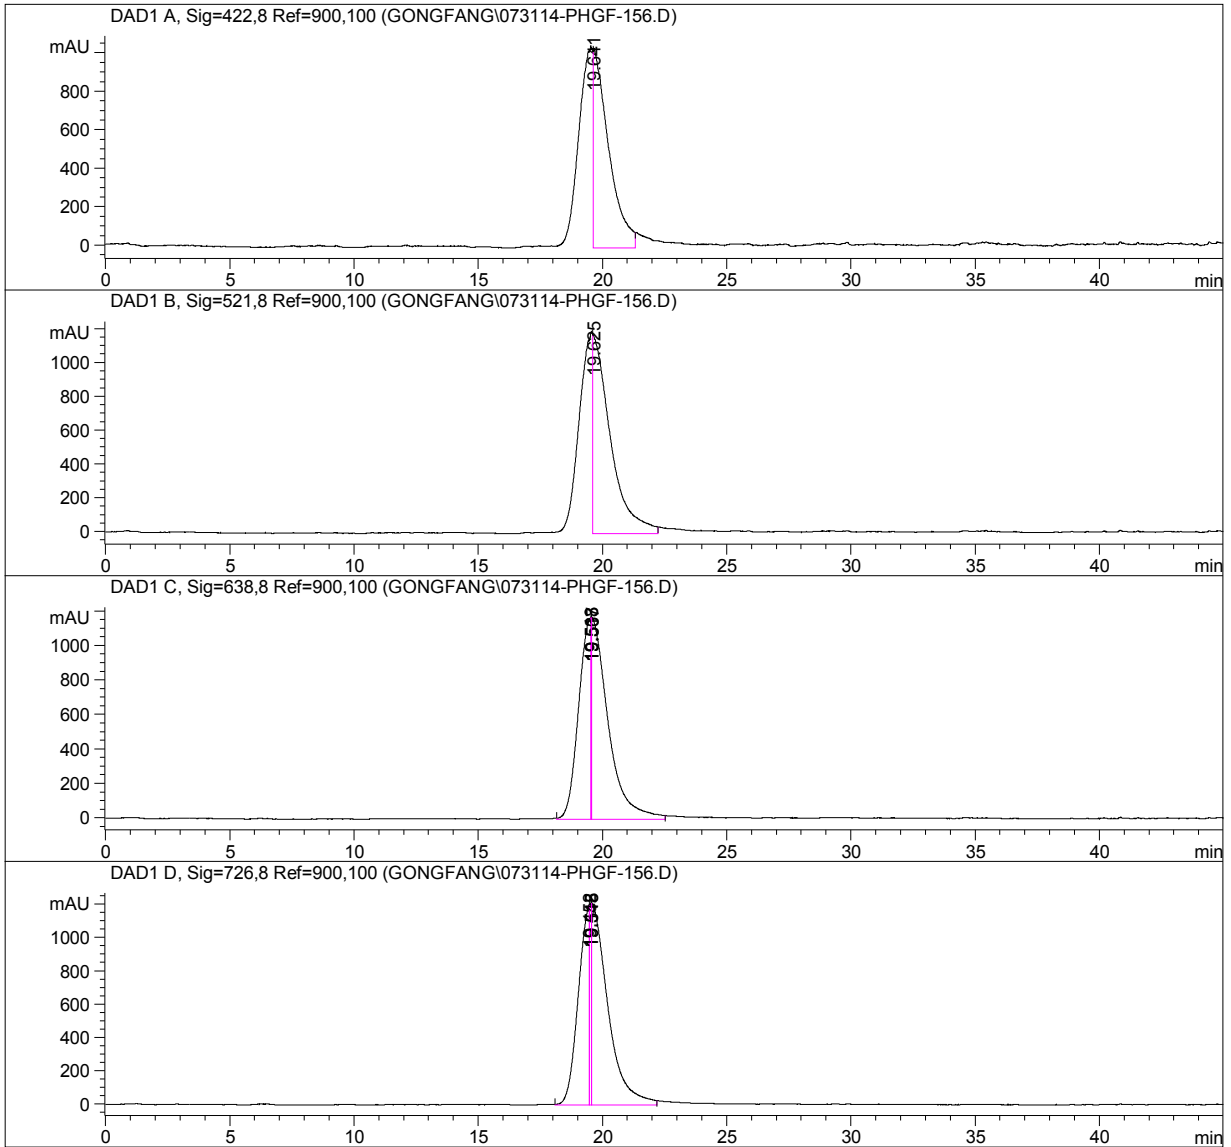

**Figure S54.** The HPLC trace of T-Ph.

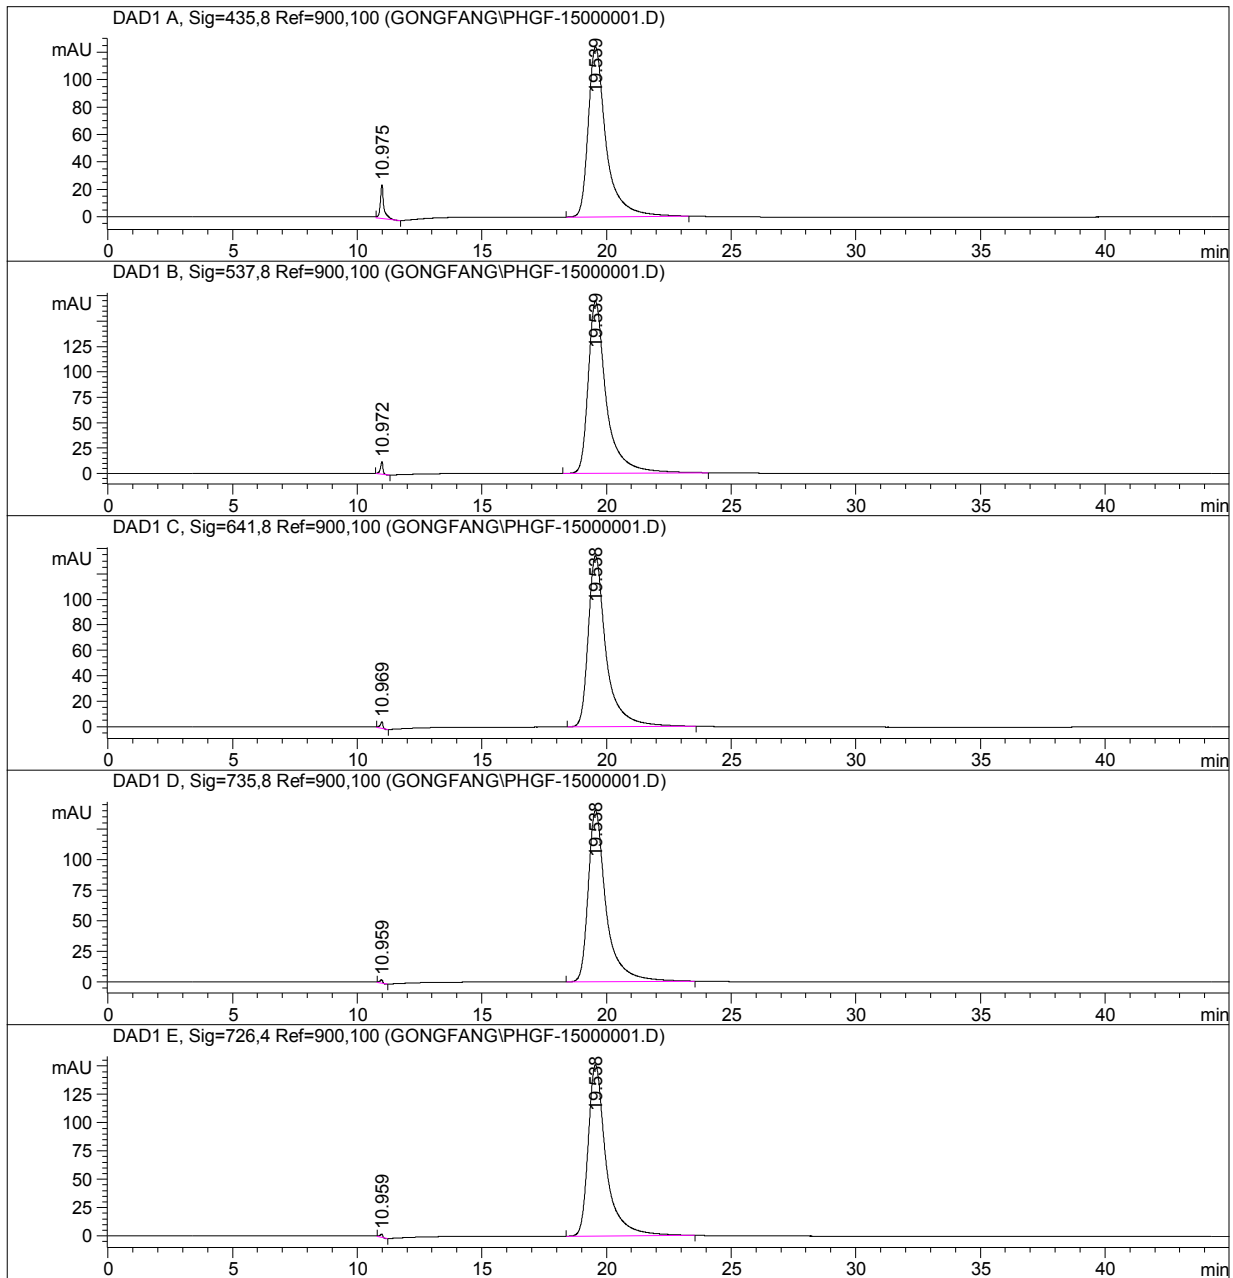

**Figure S55.** The HPLC trace of **T-Ph-H**.



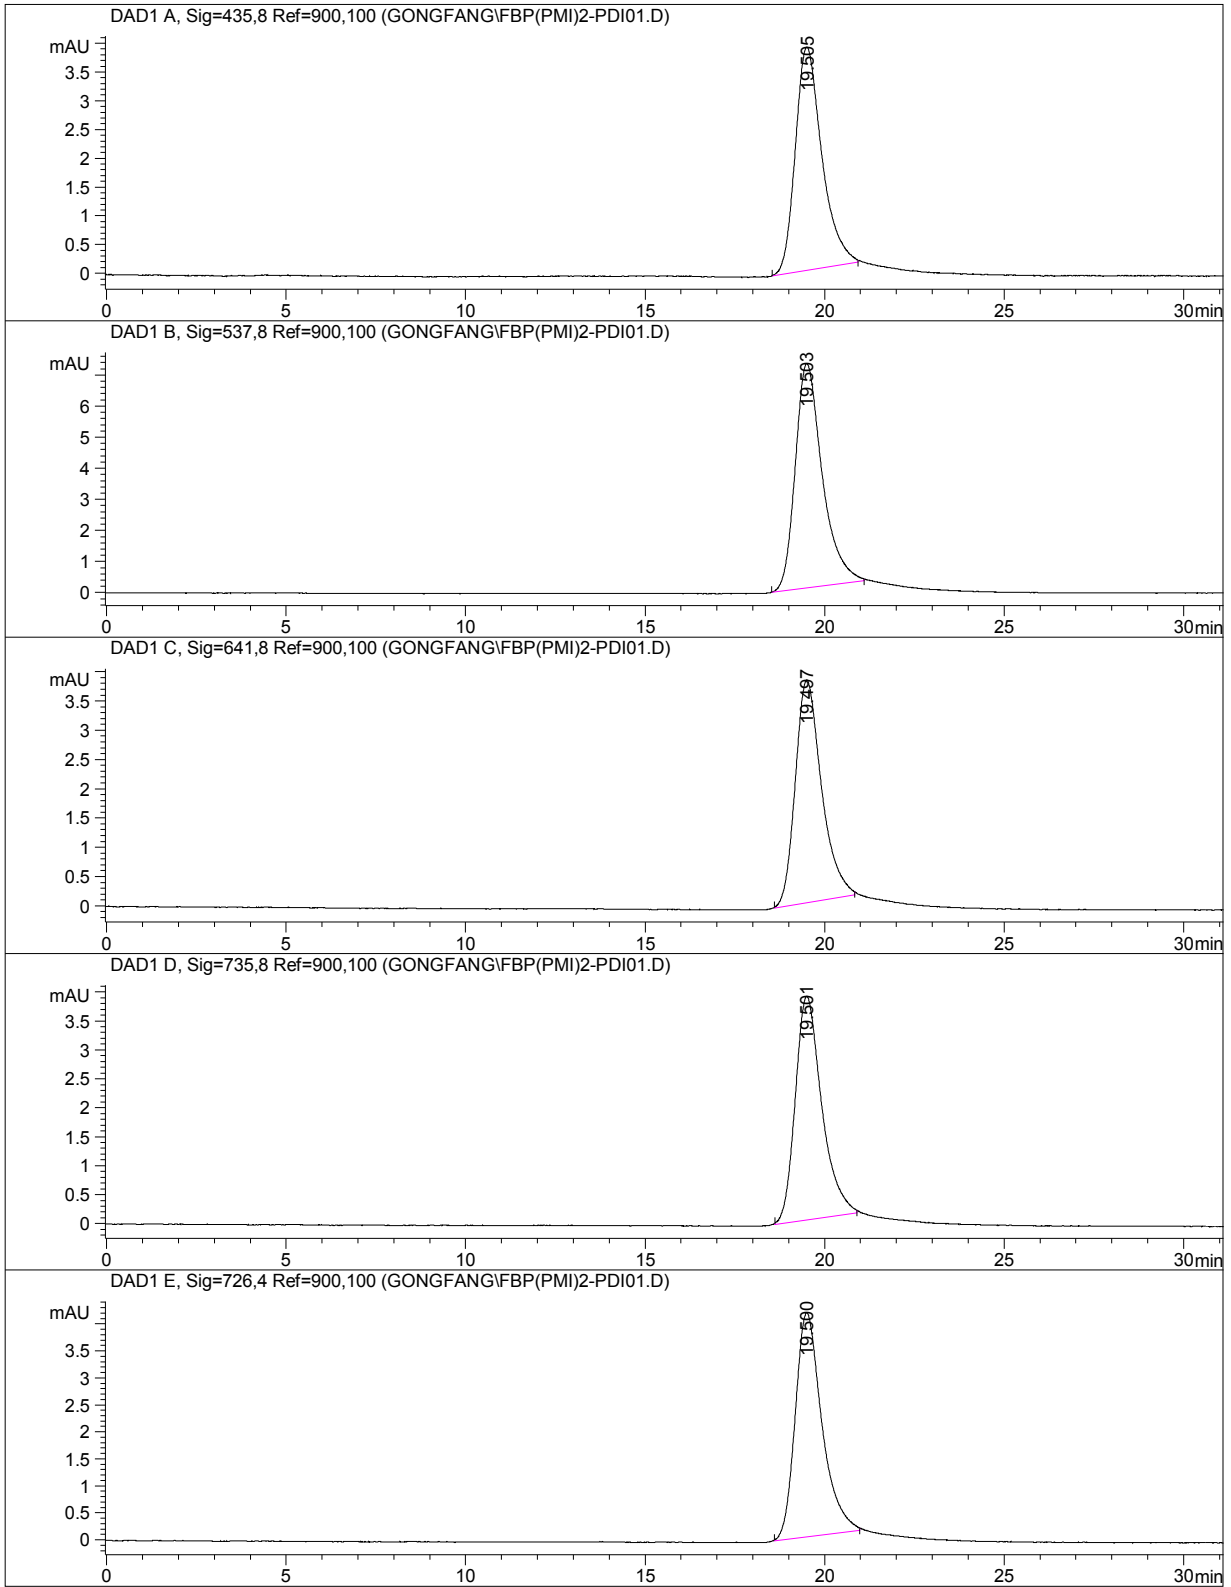

**Figure S56.** The HPLC trace of T-PDI.

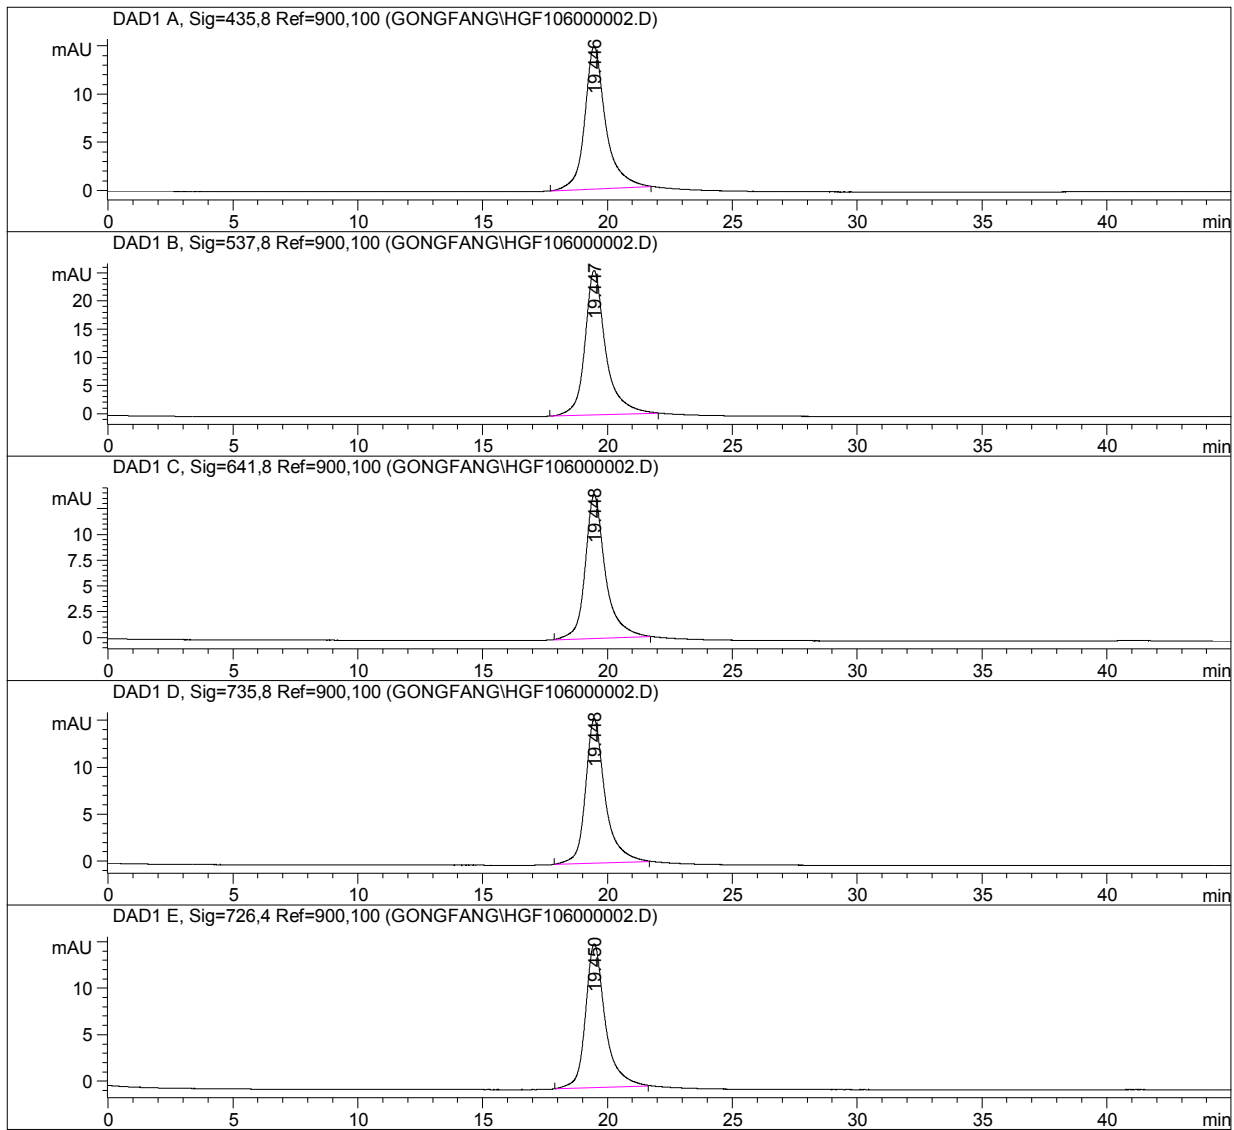

**Figure S57.** The HPLC trace of T-TMS/TIPS.

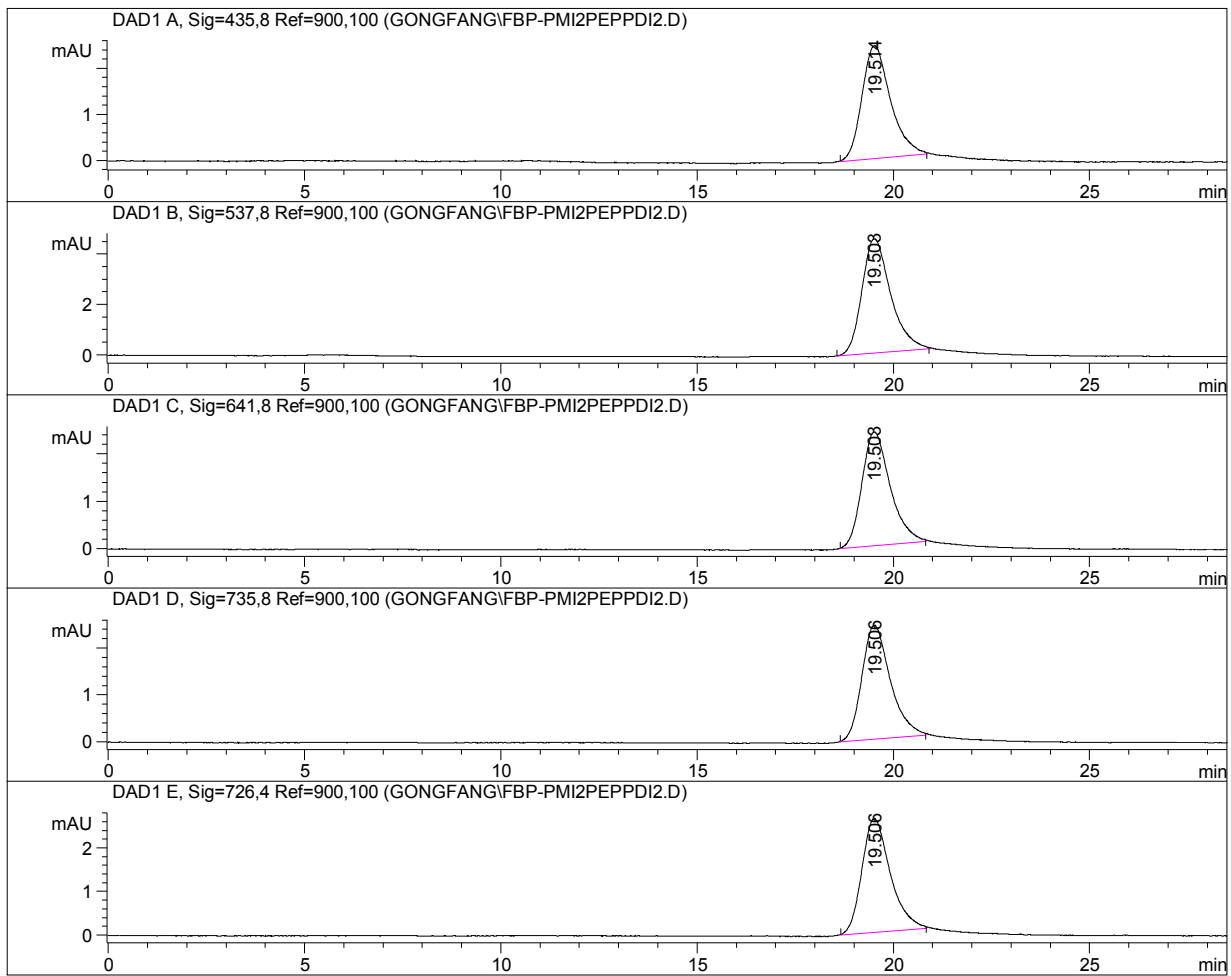

**Figure S58.** The HPLC trace of **ZnT-PDI**.

### Analytical SEC monitoring of the formation of pentad C-T-PDI.

The Sonogashira coupling reaction of **T-H/PDI** and **5** was monitored with analytical size exclusion chromatography (SEC), as has been done previously with multiporphyrin arrays.<sup>31,32</sup> The precursor **T-H/PDI** was determined to be 99% pure according to the analytical SEC trace (Figure S59, panel A). After the one-hour reaction, an aliquot of the reaction mixture was analyzed to show four peaks (panel B). The dominant peak was assigned to the unreacted **T-H/PDI** based on the retention time and corroborative MALDI-MS data. The retention time of the purified form of the pentad (panel C) and corroborative MALDI-MS and absorption data revealed that the leading peak in panel B was the desired pentad product. The other two small peaks were presumed to be some tetrapyrrolic impurities.

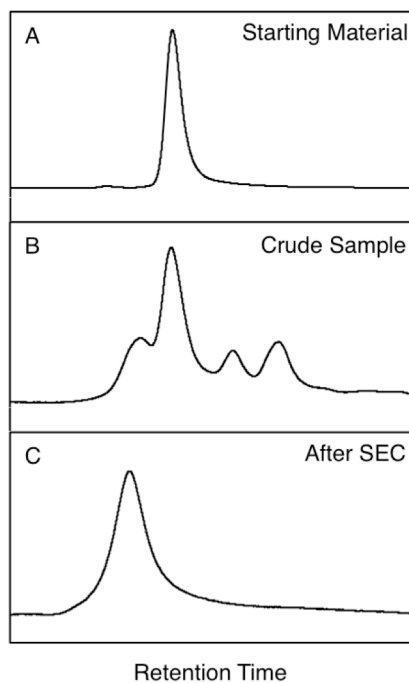

**Figure S59.** Analytical SEC traces of (A) **T-H/PDI**, (B) the crude reaction mixture, and (C) purified **C-T-PDI**.
